# Supplementary material
Source: PubMed Central journal article supplement (PMC4665795)
Supplement: JCI82871.sd.pdf [file JCI82871.sd.pdf]

Supplemental Table I. The gene expression of 27 acyltransferases in MOVAS-1 cells.

| Gene Name     | (pg)/18S(ng) | Gene Name     | (pg)/18S(ng) |
|---------------|--------------|---------------|--------------|
| <i>Acat1</i>  | 19.53        | <i>Gpat4</i>  | 9.75         |
| <i>Acat2</i>  | 0.04         | <i>Lclat1</i> | 1.05         |
| <i>Agpat1</i> | 34.31        | <i>Lpcat1</i> | 28.15        |
| <i>Agpat2</i> | 0.16         | <i>Lpcat2</i> | 0.22         |
| <i>Agpat3</i> | 71.11        | <i>Lpcat3</i> | 32.71        |
| <i>Agpat4</i> | 29.94        | <i>Lpcat4</i> | 9.49         |
| <i>Agpat5</i> | 3.30         | <i>Lpgat1</i> | 9.50         |
| <i>Awat1</i>  | N.D.         | <i>Mboat1</i> | 35.55        |
| <i>Awat2</i>  | N.D.         | <i>Mboat2</i> | N.D.         |
| <i>Dgat1</i>  | 0.02         | <i>Mboat7</i> | N.D.         |
| <i>Dgat2</i>  | 0.12         | <i>Mogat1</i> | N.D.         |
| <i>Gpat1</i>  | 13.21        | <i>Mogat2</i> | 1.09         |
| <i>Gpat2</i>  | N.D.         | <i>Sptlc1</i> | 0.12         |
| <i>Gpat3</i>  | 0.16         |               |              |

The quantitative expression values of 27 acyltransferase were calculated using the absolute standard curve method of real-time qPCR with plasmid templates containing each full length target gene.

Supplemental Table II. shRNA Clone IDs used for generating stable knockdown cells

| Gene Name     | Clone ID       |
|---------------|----------------|
| <i>Acat1</i>  | V2LMM_34791    |
| <i>Acat2</i>  | V3LMM_423666   |
| <i>Agpat1</i> | TRCN0000173860 |
| <i>Agpat2</i> | V2LMM_64946    |
| <i>Agpat3</i> | V3LMM_460834   |
| <i>Agpat4</i> | V3LMM_446166   |
| <i>Agpat5</i> | V3LMM_415929   |
| <i>Atf6</i>   | V3LMM_459160   |
| <i>Dgat1</i>  | TRCN0000124789 |
| <i>Dgat2</i>  | TRCN0000125476 |
| <i>Gpat1</i>  | TRCN0000012156 |
| <i>Gpat3</i>  | TRCN0000099285 |
| <i>Gpat4</i>  | V3LMM_414952   |
| <i>Ire1</i>   | V3LMM_425499   |
| <i>Lipin2</i> | TRCN0000098248 |
| <i>Lpcat1</i> | TRCN0000183242 |
| <i>Lpcat2</i> | V3LMM_508093   |
| <i>Lpcat3</i> | V3LMM_511114   |
| <i>Lpcat4</i> | V3LMM_451294   |
| <i>Lpgat1</i> | TRCN0000125609 |
| <i>Mboat1</i> | V3LMM_510216   |
| <i>Mogat2</i> | TRCN0000018442 |
| <i>Scd2</i>   | V3LMM_516055   |
| <i>Sptlc1</i> | TRCN0000103400 |

MOVAS-1 cells were infected with lentiviruses expressing *Acat* (1 or 2), *Agpat* (1, 2, 3, 4, or 5), *Atf6*, *Dgat*(1 or 2), *Gpat* (1, 3 or 4), *Ire1*, *Lipin2*, *Lpcat* (1, 2, 3, or 4), *Lpgat1*, *Mboat1*, *Mogat2*, *Scd2* or *Sptlc1* shRNA and selected with puromycin for 7 days. Each mRNA level was measured by real-time qPCR. Changes in gene expression are reported as ratios relative to the control empty shRNA.

**Supplemental Table III.****Fold changes of lipid contents in VSMCs treated with SCD inhibitor.**

| <b>Rank</b> |                    | <b>Fold change (vs. Veh)</b> | <b><i>p</i> value</b> |
|-------------|--------------------|------------------------------|-----------------------|
| 1           | PA-18:0/18:0       | 256.14                       | 0.00                  |
| 2           | PA-16:0/16:0       | 243.62                       | 0.00                  |
| 3           | PA-16:0/18:0       | 232.24                       | 0.00                  |
| 4           | PA-14:0/18:0       | 54.25                        | 0.00                  |
| 5           | LPA-18:0           | 9.13                         | 0.00                  |
| 6           | LPA-16:0           | 7.81                         | 0.00                  |
| 7           | DAG-16:0/18:0      | 7.10                         | 0.00                  |
| 8           | DAG-16:0/16:0      | 6.09                         | 0.01                  |
| 9           | PE-16:1/20:0       | 5.11                         | 0.00                  |
| 10          | PE-16:0/22:5       | 4.68                         | 0.03                  |
| 11          | LPS-18:2           | 4.67                         | 0.03                  |
| 12          | DAG-16:1/18:0      | 4.18                         | 0.00                  |
| 13          | DAG-18:0/18:0      | 4.07                         | 0.00                  |
| 14          | DAG-14:0/18:0      | 3.85                         | 0.00                  |
| 15          | LPS-16:0           | 3.78                         | 0.08                  |
| 16          | PE-16:0/16:1       | 3.77                         | 0.04                  |
| 17          | PE-16:0/18:3       | 3.70                         | 0.09                  |
| 18          | PS-17:0/17:6       | 3.68                         | 0.12                  |
| 19          | PS-18:1/22:4       | 3.63                         | 0.15                  |
| 20          | PS-16:1/18:0       | 3.41                         | 0.01                  |
| 21          | LPA-16:1           | 3.32                         | 0.07                  |
| 22          | PE-16:0/22:6       | 3.26                         | 0.18                  |
| 23          | TAG-18:0/18:0/18:0 | 3.21                         | 0.01                  |
| 24          | PE-18:3/20:0       | 3.14                         | 0.01                  |
| 25          | LPA-20:5           | 2.93                         | 0.03                  |
| 26          | PE-20:0/20:4       | 2.86                         | 0.00                  |
| 27          | PE-16:0/18:2       | 2.69                         | 0.00                  |
| 28          | PG-16:0/20:3       | 2.69                         | 0.22                  |
| 29          | DAG-18:0/18:1      | 2.62                         | 0.01                  |
| 30          | PG-16:0/16:0       | 2.48                         | 0.08                  |
| 31          | PG-16:0/20:1       | 2.48                         | 0.13                  |
| 32          | PE-16:1/18:0       | 2.46                         | 0.02                  |
| 33          | PS-16:1/18:06      | 2.37                         | 0.04                  |
| 34          | PE-18:0/20:5       | 2.37                         | 0.01                  |
| 35          | TAG-16:0/16:0/18:0 | 2.30                         | 0.00                  |
| 36          | PG-16:0/16:0       | 2.29                         | 0.10                  |
| 37          | PE-16:0/20:2       | 2.26                         | 0.06                  |
| 38          | LPC-16:0e          | 2.22                         | 0.01                  |
| 39          | PE-16:0/18:0       | 2.18                         | 0.23                  |
| 40          | PE-16:1/16:1       | 2.17                         | 0.05                  |
| 41          | PG-16:0/20:1       | 2.04                         | 0.19                  |

|    |                    |      |      |
|----|--------------------|------|------|
| 42 | DAG-14:0/18:1      | 1.98 | 0.03 |
| 43 | LPA-18:1           | 1.93 | 0.10 |
| 44 | PG-16:1/20:0       | 1.93 | 0.20 |
| 45 | PS-18:1/22:6       | 1.90 | 0.07 |
| 46 | LPS-22:6           | 1.88 | 0.20 |
| 47 | PE-18:2/22:5       | 1.86 | 0.02 |
| 48 | PS-18:1/20:3       | 1.83 | 0.17 |
| 49 | LPS-16:1           | 1.79 | 0.07 |
| 50 | PS-16:0/18:6       | 1.76 | 0.06 |
| 51 | LPC-18:0           | 1.76 | 0.07 |
| 52 | PI-18:0/18:0       | 1.75 | 0.19 |
| 53 | DAG-16:0/18:1      | 1.73 | 0.07 |
| 54 | PA-18:0/20:4       | 1.72 | 0.18 |
| 55 | PG-16:0/16:1       | 1.71 | 0.28 |
| 56 | CER-18:0           | 1.70 | 0.00 |
| 57 | DAG-16:0/20:3      | 1.66 | 0.23 |
| 58 | PE-16:0/18:1       | 1.63 | 0.15 |
| 59 | PE-18:0/18:2       | 1.62 | 0.15 |
| 60 | LPA-22:6           | 1.59 | 0.37 |
| 61 | LPS-18:1           | 1.58 | 0.07 |
| 62 | PE-16:1/22:4       | 1.58 | 0.21 |
| 63 | PS-18:0/22:5       | 1.55 | 0.24 |
| 64 | PE-18:2/20:3       | 1.54 | 0.19 |
| 65 | SM-22:0            | 1.51 | 0.09 |
| 66 | TAG-16:0/16:0/16:0 | 1.51 | 0.09 |
| 67 | PA-16:0/18:1       | 1.50 | 0.14 |
| 68 | PC-36:0            | 1.49 | 0.03 |
| 69 | PC-36:7            | 1.45 | 0.03 |
| 70 | CE-22:6            | 1.44 | 0.28 |
| 71 | PE-16:1/22:5       | 1.44 | 0.07 |
| 72 | PE-18:1/18:2       | 1.43 | 0.14 |
| 73 | LPA-18:2           | 1.43 | 0.33 |
| 74 | PE-18:0/22:6       | 1.42 | 0.15 |
| 75 | PE-18:0/18:3       | 1.39 | 0.14 |
| 76 | PE-16:1/18:1       | 1.37 | 0.25 |
| 77 | PI-18:0/20:4       | 1.36 | 0.29 |
| 78 | PS-20:1/20:4       | 1.35 | 0.35 |
| 79 | PS-16:0/18:0       | 1.34 | 0.32 |
| 80 | PA-16:0/16:1       | 1.34 | 0.27 |
| 81 | CER-24:0           | 1.34 | 0.01 |
| 82 | PI-16:0/16:0       | 1.33 | 0.35 |
| 83 | PA-16:0/20:1       | 1.32 | 0.32 |
| 84 | PS-18:1/22:5       | 1.32 | 0.18 |
| 85 | PE-16:1/18:2       | 1.26 | 0.33 |

|     |                    |      |      |
|-----|--------------------|------|------|
| 86  | CE-20:4            | 1.26 | 0.28 |
| 87  | CER-20:0           | 1.25 | 0.16 |
| 88  | LPS-18:0           | 1.22 | 0.37 |
| 89  | PE-16:0/20:3       | 1.22 | 0.17 |
| 90  | PE-18:0/22:5       | 1.21 | 0.21 |
| 91  | PE-18:1/22:4       | 1.21 | 0.25 |
| 92  | PE-18:2/20:2       | 1.21 | 0.41 |
| 93  | DAG-16:1/18:1      | 1.20 | 0.34 |
| 94  | DAG-18:0/20:4      | 1.18 | 0.25 |
| 95  | PS-17:0/17:0       | 1.18 | 0.25 |
| 96  | PS-16:1/18:1       | 1.18 | 0.12 |
| 97  | PE-16:0/20:4       | 1.16 | 0.34 |
| 98  | PE-18:1/22:5       | 1.15 | 0.28 |
| 99  | PE-18:2/20:1       | 1.15 | 0.36 |
| 100 | PE-18:0/20:4       | 1.14 | 0.28 |
| 101 | PE-16:1/20:2       | 1.13 | 0.40 |
| 102 | PE-16:1/22:6       | 1.12 | 0.33 |
| 103 | PS-20:0/20:4       | 1.12 | 0.34 |
| 104 | LPI-18:1           | 1.11 | 0.39 |
| 105 | PE-18:1/20:2       | 1.10 | 0.36 |
| 106 | PS-18:1/20:4       | 1.10 | 0.41 |
| 107 | PE-18:2/18:2       | 1.10 | 0.44 |
| 108 | PE-18:1/20:3       | 1.09 | 0.39 |
| 109 | PE-14:0/18:1       | 1.09 | 0.44 |
| 110 | TAG-16:0/17:0/18:0 | 1.09 | 0.45 |
| 111 | LPI-18:0           | 1.09 | 0.44 |
| 112 | SM-20:0            | 1.08 | 0.41 |
| 113 | PE-16:0/16:0       | 1.08 | 0.39 |
| 114 | PA-16:1/18:0       | 1.08 | 0.30 |
| 115 | PC-36:1            | 1.07 | 0.35 |
| 116 | PE-16:1/20:4       | 1.06 | 0.44 |
| 117 | PA-18:0/20:3       | 1.06 | 0.46 |
| 118 | PE-18:3/20:1       | 1.06 | 0.46 |
| 119 | TAG-16:1/16:1/16:1 | 1.05 | 0.47 |
| 120 | LPA-20:3           | 1.05 | 0.48 |
| 121 | PI-16:0/20:4       | 1.05 | 0.45 |
| 122 | PE-16:0/22:4       | 1.04 | 0.46 |
| 123 | PS-16:0/16:1       | 1.03 | 0.48 |
| 124 | PC-28:0            | 1.03 | 0.41 |
| 125 | PE-18:1/18:1       | 1.03 | 0.46 |
| 126 | SM-24:0            | 1.03 | 0.46 |
| 127 | DAG-18:1/20:4      | 1.02 | 0.49 |
| 128 | PE-18:0/20:3       | 1.02 | 0.48 |
| 129 | DAG-18:1/18:1      | 1.01 | 0.49 |

|     |                    |      |      |
|-----|--------------------|------|------|
| 130 | CER-16:0           | 1.00 | 0.50 |
| 131 | DAG-16:0/18:2      | 1.00 | 0.50 |
| 132 | LPC-22:0           | 0.99 | 0.49 |
| 133 | PG-16:0/18:0       | 0.98 | 0.47 |
| 134 | LPC-18:1           | 0.97 | 0.46 |
| 135 | SM-22:1            | 0.96 | 0.45 |
| 136 | PE-16:1/20:1       | 0.96 | 0.45 |
| 137 | PA-18:0/18:1       | 0.96 | 0.42 |
| 138 | SM-24:1            | 0.95 | 0.42 |
| 139 | PS-18:0/20:3       | 0.90 | 0.28 |
| 140 | SM-20:1            | 0.89 | 0.37 |
| 141 | PA-16:1/18:1       | 0.89 | 0.45 |
| 142 | PS-18:0/20:4       | 0.88 | 0.30 |
| 143 | PE-18:1/22:6       | 0.88 | 0.11 |
| 144 | PG-16:0/18:1       | 0.88 | 0.40 |
| 145 | PE-18:1/20:5       | 0.87 | 0.38 |
| 146 | PE-18:0/22:4       | 0.87 | 0.29 |
| 147 | PE-16:0/20:1       | 0.86 | 0.42 |
| 148 | PA-18:0/18:2       | 0.85 | 0.24 |
| 149 | TAG-16:0/16:1/17:0 | 0.84 | 0.36 |
| 150 | CER-24:1           | 0.84 | 0.29 |
| 151 | PG-16:0/18:0       | 0.84 | 0.31 |
| 152 | PC-36:8            | 0.84 | 0.26 |
| 153 | DAG-18:0/18:2      | 0.83 | 0.32 |
| 154 | PC-30:1            | 0.82 | 0.16 |
| 155 | TAG-14:0/17:0/18:1 | 0.82 | 0.30 |
| 156 | PE-20:0/22:6       | 0.81 | 0.34 |
| 157 | PG-18:0/18:2       | 0.81 | 0.36 |
| 158 | PG-16:0/18:1       | 0.81 | 0.34 |
| 159 | PE-18:1/18:3       | 0.80 | 0.27 |
| 160 | PG-16:1/18:0       | 0.80 | 0.39 |
| 161 | PC-32:1            | 0.79 | 0.08 |
| 162 | PE-16:1/22:2       | 0.79 | 0.31 |
| 163 | PE-18:1/20:4       | 0.78 | 0.10 |
| 164 | PS-16:0/18:2       | 0.78 | 0.31 |
| 165 | SM-18:2            | 0.77 | 0.07 |
| 166 | TAG-18:0/18:0/18:1 | 0.76 | 0.32 |
| 167 | DAG-18:1/18:2      | 0.76 | 0.25 |
| 168 | TAG-16:0/18:0/18:1 | 0.76 | 0.27 |
| 169 | PE-16:0/20:5       | 0.74 | 0.34 |
| 170 | PC-32:3            | 0.74 | 0.03 |
| 171 | PC-34:1            | 0.73 | 0.07 |
| 172 | PG-16:1/18:1       | 0.73 | 0.35 |
| 173 | PG-16:0/18:2       | 0.73 | 0.05 |

|     |                    |      |      |
|-----|--------------------|------|------|
| 174 | PS-16:0/18:1       | 0.72 | 0.31 |
| 175 | PA-18:1/18:2       | 0.72 | 0.31 |
| 176 | LPC-24:0           | 0.71 | 0.26 |
| 177 | TAG-16:1/16:1/18:0 | 0.71 | 0.07 |
| 178 | PC-32:2            | 0.70 | 0.02 |
| 179 | LPC-18:0e          | 0.70 | 0.07 |
| 180 | PE-18:0/18:1       | 0.69 | 0.15 |
| 181 | LPC-16:1           | 0.69 | 0.22 |
| 182 | CE-20:5            | 0.69 | 0.37 |
| 183 | TAG-14:0/18:0/18:1 | 0.68 | 0.14 |
| 184 | PC-30:0            | 0.68 | 0.02 |
| 185 | CE-18:2            | 0.68 | 0.03 |
| 186 | PC-30:2            | 0.66 | 0.00 |
| 187 | CE-16:0            | 0.66 | 0.27 |
| 188 | TAG-18:1/18:1/20:4 | 0.66 | 0.33 |
| 189 | TAG-14:0/16:0/18:2 | 0.65 | 0.10 |
| 190 | PC-34:2            | 0.65 | 0.01 |
| 191 | PE-16:1/20:3       | 0.65 | 0.21 |
| 192 | PG-16:0/18:2       | 0.64 | 0.06 |
| 193 | PC-32:0            | 0.64 | 0.00 |
| 194 | PC-28:1            | 0.63 | 0.00 |
| 195 | PE-20:4/22:5       | 0.63 | 0.18 |
| 196 | PC-34:5            | 0.63 | 0.03 |
| 197 | PC-38:2            | 0.63 | 0.02 |
| 198 | TAG-14:0/16:0/18:1 | 0.63 | 0.11 |
| 199 | PE-20:1/20:4       | 0.62 | 0.16 |
| 200 | TAG-16:0/17:0/18:1 | 0.62 | 0.24 |
| 201 | PS-16:0/18:16      | 0.61 | 0.04 |
| 202 | PA-18:1/18:1       | 0.60 | 0.11 |
| 203 | LPC-16:0           | 0.60 | 0.05 |
| 204 | PG-18:1/18:3       | 0.60 | 0.31 |
| 205 | LPC-18:2           | 0.59 | 0.07 |
| 206 | CE-18:0            | 0.59 | 0.21 |
| 207 | PC-36:6            | 0.59 | 0.01 |
| 208 | PC-28:2            | 0.59 | 0.00 |
| 209 | PC-40:5            | 0.58 | 0.02 |
| 210 | PC-40:6            | 0.58 | 0.03 |
| 211 | PC-36:2            | 0.57 | 0.01 |
| 212 | PC-36:3            | 0.56 | 0.02 |
| 213 | PC-33:1            | 0.54 | 0.02 |
| 214 | PC-34:3            | 0.54 | 0.00 |
| 215 | LPC-18:3           | 0.52 | 0.18 |
| 216 | PC-38:3            | 0.52 | 0.00 |
| 217 | PC-40:4            | 0.52 | 0.00 |

|     |                    |      |      |
|-----|--------------------|------|------|
| 218 | TAG-18:2/18:2/18:2 | 0.51 | 0.02 |
| 219 | PC-38:7            | 0.50 | 0.02 |
| 220 | TAG-15:0/18:1/18:1 | 0.49 | 0.06 |
| 221 | LPS-20:3           | 0.49 | 0.07 |
| 222 | TAG-15:0/16:0/18:1 | 0.49 | 0.16 |
| 223 | LPC-22:1           | 0.48 | 0.15 |
| 224 | CE-18:1            | 0.48 | 0.11 |
| 225 | PS-16:1/22:4       | 0.48 | 0.18 |
| 226 | LPC-20:0           | 0.47 | 0.00 |
| 227 | TAG-14:1/18:0/18:2 | 0.47 | 0.10 |
| 228 | TAG-14:0/16:1/18:1 | 0.47 | 0.11 |
| 229 | TAG-14:1/16:1/18:0 | 0.47 | 0.11 |
| 230 | PC-34:4            | 0.47 | 0.01 |
| 231 | PC-40:7            | 0.45 | 0.00 |
| 232 | DAG-18:1/20:3      | 0.44 | 0.05 |
| 233 | PC-38:6            | 0.44 | 0.00 |
| 234 | PC-38:4            | 0.43 | 0.00 |
| 235 | PC-36:4            | 0.42 | 0.00 |
| 236 | LPI-20:3           | 0.41 | 0.18 |
| 237 | PC-36:5            | 0.41 | 0.01 |
| 238 | TAG-14:1/16:0/18:1 | 0.41 | 0.13 |
| 239 | TAG-18:1/18:1/22:6 | 0.41 | 0.12 |
| 240 | PC-38:5            | 0.41 | 0.00 |
| 241 | CE-16:1            | 0.40 | 0.05 |
| 242 | TAG-18:0/18:1/18:1 | 0.40 | 0.06 |
| 243 | PG-16:1/20:1       | 0.40 | 0.30 |
| 244 | LPI-20:4           | 0.39 | 0.16 |
| 245 | TAG-16:1/16:1/18:1 | 0.39 | 0.02 |
| 246 | TAG-16:0/16:0/18:2 | 0.37 | 0.04 |
| 247 | TAG-18:1/18:1/18:1 | 0.36 | 0.10 |
| 248 | PG-18:1/18:1       | 0.35 | 0.08 |
| 249 | PG-18:2/18:2       | 0.34 | 0.13 |
| 250 | LPI-20:3           | 0.34 | 0.17 |
| 251 | TAG-16:0/16:1/18:1 | 0.34 | 0.04 |
| 252 | TAG-16:0/18:1/18:1 | 0.33 | 0.05 |
| 253 | PS-18:0/22:4       | 0.33 | 0.03 |
| 254 | TAG-18:1/18:2/18:2 | 0.33 | 0.07 |
| 255 | CE-20:3            | 0.32 | 0.05 |
| 256 | LPI-20:4           | 0.32 | 0.15 |
| 257 | PG-18:1/18:2       | 0.30 | 0.16 |
| 258 | TAG-16:0/18:2/18:2 | 0.29 | 0.06 |
| 259 | PE-18:2/20:4       | 0.28 | 0.15 |
| 260 | LPC-20:3           | 0.27 | 0.03 |
| 261 | LPI-18:2           | 0.26 | 0.19 |



|            |                    |      |      |
|------------|--------------------|------|------|
| <b>262</b> | TAG-16:0/18:1/18:2 | 0.26 | 0.07 |
| <b>263</b> | TAG-16:1/17:0/18:1 | 0.26 | 0.05 |
| <b>264</b> | TAG-16:1/18:1/18:2 | 0.26 | 0.04 |
| <b>265</b> | TAG-16:1/18:1/18:2 | 0.26 | 0.04 |
| <b>266</b> | LPC-20:4           | 0.25 | 0.09 |
| <b>267</b> | TAG-18:0/18:2/18:2 | 0.24 | 0.06 |
| <b>268</b> | TAG-18:1/18:1/18:2 | 0.23 | 0.03 |
| <b>269</b> | LPI-18:2           | 0.21 | 0.18 |
| <b>270</b> | PG-14:0/18:1       | 0.20 | 0.14 |
| <b>271</b> | PG-14:0/18:1       | 0.20 | 0.16 |
| <b>272</b> | TAG-17:0/18:1/18:1 | 0.16 | 0.03 |
| <b>273</b> | TAG-17:0/18:1/18:1 | 0.16 | 0.03 |
| <b>274</b> | TAG-14:1/18:1/18:1 | 0.16 | 0.07 |
| <b>275</b> | TAG-16:1/18:1/18:1 | 0.15 | 0.02 |
| <b>276</b> | TAG-16:0/17:0/18:2 | 0.15 | 0.02 |
| <b>277</b> | PG-16:0/20:4       | 0.00 | 0.19 |
| <b>278</b> | PG-16:1/20:3       | 0.00 | 0.03 |
| <b>279</b> | PG-18:0/18:3       | 0.00 | 0.19 |

---

VSMCs were treated with 300nM CAY10566 for 24 hours.

Total lipids were extracted using Bligh & Dyer's method and analyzed with LC-MS/MS.

CE; choletseryl ester, DAG; CER; ceramide, diacylglycerol, LPA; lysophosphatidic acid;

LPC; lysophosphatidylcholine, LPE; lysophosphatidiyl ethanolamine,

LPI; lysophosphatidylinsitol, LPS; lysophosphatidylserinePA; phosphatidic acid,

PC; phosphatidylcholine, PE; phosphatidylethanolamine, PG; phosphatidylglycerol

PI; phosphatidylinositol, PS; phosphatidylserine, SM; sphingomyelin; TAG; triacylglycerol,

**Supplemental Table IV.****Fold changes of lipid content in the medail layer of aortas from SMC-Scd1/2 KO mice**

| <b>Rank</b> |                    | <b>Fold change (vs control)</b> | <b><i>P</i> value</b> |
|-------------|--------------------|---------------------------------|-----------------------|
| 1           | PA-18:0/18:0       | 63.00                           | 0.00                  |
| 2           | PA-16:0/18:0       | 11.29                           | 0.00                  |
| 3           | PA-14:0/18:0       | 7.71                            | 0.00                  |
| 4           | PA-16:0/16:0       | 7.22                            | 0.00                  |
| 5           | PG-16:0/16:0       | 4.25                            | 0.09                  |
| 6           | PG-16:0/20:1       | 4.15                            | 0.10                  |
| 7           | PE-16:1/20:0       | 4.08                            | 0.01                  |
| 8           | LPS-16:0           | 3.73                            | 0.04                  |
| 9           | LPA-18:0           | 3.69                            | 0.00                  |
| 10          | LPC-20:0           | 3.65                            | 0.02                  |
| 11          | DAG-16:0/18:0      | 3.55                            | 0.01                  |
| 12          | PE-16:1/22:4       | 3.35                            | 0.01                  |
| 13          | LPS-16:1           | 3.19                            | 0.18                  |
| 14          | LPI-18:0           | 3.10                            | 0.05                  |
| 15          | PI-16:0/16:0       | 3.02                            | 0.07                  |
| 16          | TAG-16:0/17:0/18:0 | 2.95                            | 0.09                  |
| 17          | PG-16:1/18:0       | 2.93                            | 0.20                  |
| 18          | PS-16:1/18:0       | 2.75                            | 0.06                  |
| 19          | PE-20:0/20:4       | 2.50                            | 0.03                  |
| 20          | DAG-16:1/18:0      | 2.44                            | 0.02                  |
| 21          | LPI-18:2           | 2.39                            | 0.15                  |
| 22          | CE-20:5            | 2.34                            | 0.09                  |
| 23          | PS-16:0/18:6       | 2.29                            | 0.06                  |
| 24          | LPS-22:6           | 2.28                            | 0.02                  |
| 25          | PS-16:1/22:4       | 2.22                            | 0.08                  |
| 26          | PS-18:0/22:4       | 2.17                            | 0.10                  |
| 27          | DAG-18:0/18:1      | 2.16                            | 0.00                  |
| 28          | CER-18:0           | 2.15                            | 0.01                  |
| 29          | PS-18:1/20:4       | 2.13                            | 0.18                  |
| 30          | PG-16:0/18:1       | 2.12                            | 0.23                  |
| 31          | DAG-14:0/18:0      | 2.09                            | 0.05                  |
| 32          | PS-18:1/22:4       | 2.05                            | 0.26                  |
| 33          | PS-16:0/18:0       | 2.02                            | 0.24                  |
| 34          | PA-16:0/20:1       | 2.00                            | 0.13                  |
| 35          | PG-18:0/18:2       | 1.97                            | 0.18                  |
| 36          | DAG-16:0/16:0      | 1.90                            | 0.01                  |
| 37          | DAG-18:0/18:0      | 1.90                            | 0.09                  |
| 38          | PS-16:0/18:2       | 1.86                            | 0.10                  |
| 39          | PE-18:0/22:6       | 1.85                            | 0.01                  |
| 40          | LPI-18:1           | 1.84                            | 0.20                  |
| 41          | LPI-20:3           | 1.83                            | 0.16                  |
| 42          | PG-16:0/16:1       | 1.82                            | 0.29                  |
| 43          | PE-18:2/20:4       | 1.82                            | 0.20                  |
| 44          | PS-18:1/22:6       | 1.81                            | 0.15                  |

|    |                    |      |      |
|----|--------------------|------|------|
| 45 | LPC-16:0e          | 1.79 | 0.12 |
| 46 | SM-22:0            | 1.78 | 0.00 |
| 47 | PE-16:0/22:6       | 1.75 | 0.21 |
| 48 | TAG-16:0/16:0/18:0 | 1.75 | 0.20 |
| 49 | PE-16:0/20:1       | 1.74 | 0.14 |
| 50 | LPE-18:0           | 1.70 | 0.21 |
| 51 | LPA-16:0           | 1.70 | 0.04 |
| 52 | TAG-18:0/18:0/18:0 | 1.69 | 0.12 |
| 53 | PA-16:1/18:0       | 1.69 | 0.03 |
| 54 | PG-16:1/20:1       | 1.63 | 0.34 |
| 55 | PS-16:0/16:1       | 1.63 | 0.04 |
| 56 | CER-24:0           | 1.61 | 0.03 |
| 57 | CE-18:0            | 1.61 | 0.27 |
| 58 | LPC-18:0           | 1.59 | 0.03 |
| 59 | LPC-16:1           | 1.58 | 0.12 |
| 60 | PS-20:0/20:4       | 1.56 | 0.19 |
| 61 | PI-18:0/18:0       | 1.56 | 0.19 |
| 62 | LPI-20:4           | 1.55 | 0.21 |
| 63 | PE-16:0/18:0       | 1.54 | 0.08 |
| 64 | LPC-22:0           | 1.53 | 0.23 |
| 65 | PE-16:0/20:4       | 1.52 | 0.08 |
| 66 | DAG-18:1/20:4      | 1.49 | 0.24 |
| 67 | LPE-18:1           | 1.46 | 0.32 |
| 68 | PS-18:0/20:4       | 1.44 | 0.27 |
| 69 | CE-16:0            | 1.44 | 0.19 |
| 70 | PE-18:0/18:2       | 1.41 | 0.04 |
| 71 | SM-16:0            | 1.41 | 0.07 |
| 72 | PS-18:1/22:5       | 1.41 | 0.06 |
| 73 | PE-16:1/20:3       | 1.41 | 0.19 |
| 74 | PE-16:1/18:0       | 1.40 | 0.09 |
| 75 | PG-16:0/18:2       | 1.39 | 0.36 |
| 76 | LPA-20:3           | 1.38 | 0.39 |
| 77 | PC-36:0            | 1.36 | 0.01 |
| 78 | PI-16:0/20:4       | 1.34 | 0.36 |
| 79 | PE-16:0/16:0       | 1.34 | 0.15 |
| 80 | PE-18:0/22:5       | 1.30 | 0.15 |
| 81 | PE-18:1/22:5       | 1.29 | 0.04 |
| 82 | PE-18:1/22:6       | 1.29 | 0.26 |
| 83 | PE-18:0/20:4       | 1.28 | 0.13 |
| 84 | PE-18:2/20:3       | 1.28 | 0.30 |
| 85 | SM-18:0            | 1.28 | 0.06 |
| 86 | TAG-16:0/16:0/16:0 | 1.27 | 0.33 |
| 87 | PA-18:0/18:1       | 1.27 | 0.16 |
| 88 | SM-20:0            | 1.27 | 0.00 |
| 89 | PG-16:0/18:0       | 1.25 | 0.41 |
| 90 | PI-18:0/20:4       | 1.22 | 0.25 |
| 91 | LPC-24:0           | 1.21 | 0.25 |

|            |                    |      |      |
|------------|--------------------|------|------|
| <b>92</b>  | PE-18:0/18:1       | 1.20 | 0.14 |
| <b>93</b>  | PE-16:1/20:2       | 1.20 | 0.33 |
| <b>94</b>  | PE-18:0/18:3       | 1.20 | 0.33 |
| <b>95</b>  | PS-16:1/18:1       | 1.19 | 0.36 |
| <b>96</b>  | PC-36:7            | 1.19 | 0.05 |
| <b>97</b>  | DAG-18:0/18:2      | 1.19 | 0.28 |
| <b>98</b>  | PE-16:1/22:5       | 1.18 | 0.32 |
| <b>99</b>  | PE-16:0/18:1       | 1.17 | 0.21 |
| <b>100</b> | CE-20:3            | 1.17 | 0.43 |
| <b>101</b> | PE-16:0/16:1       | 1.16 | 0.32 |
| <b>102</b> | PE-18:0/20:5       | 1.16 | 0.41 |
| <b>103</b> | LPC-18:0e          | 1.15 | 0.32 |
| <b>104</b> | LPS-18:0           | 1.14 | 0.35 |
| <b>105</b> | SM-22:1            | 1.13 | 0.09 |
| <b>106</b> | PE-16:0/20:3       | 1.12 | 0.37 |
| <b>107</b> | PA-18:0/18:2       | 1.12 | 0.32 |
| <b>108</b> | SM-18:1            | 1.12 | 0.22 |
| <b>109</b> | PE-18:2/22:5       | 1.12 | 0.33 |
| <b>110</b> | CE-20:4            | 1.12 | 0.35 |
| <b>111</b> | SM-24:0            | 1.11 | 0.18 |
| <b>112</b> | PE-16:0/18:2       | 1.09 | 0.33 |
| <b>113</b> | PE-16:1/20:1       | 1.08 | 0.29 |
| <b>114</b> | PC-36:1            | 1.07 | 0.23 |
| <b>115</b> | SM-24:1            | 1.07 | 0.27 |
| <b>116</b> | LPC-18:1           | 1.07 | 0.43 |
| <b>117</b> | PE-16:0/22:4       | 1.07 | 0.46 |
| <b>118</b> | PE-18:0/20:3       | 1.06 | 0.41 |
| <b>119</b> | PC-28:0            | 1.06 | 0.25 |
| <b>120</b> | PE-18:1/18:1       | 1.06 | 0.40 |
| <b>121</b> | PA-16:0/18:1       | 1.06 | 0.38 |
| <b>122</b> | LPC-16:0           | 1.06 | 0.41 |
| <b>123</b> | PE-18:1/20:5       | 1.06 | 0.46 |
| <b>124</b> | DAG-14:0/18:1      | 1.05 | 0.38 |
| <b>125</b> | TAG-14:0/18:0/18:1 | 1.04 | 0.46 |
| <b>126</b> | LPC-18:3           | 1.04 | 0.47 |
| <b>127</b> | PE-20:0/22:6       | 1.03 | 0.48 |
| <b>128</b> | LPA-18:2           | 1.02 | 0.49 |
| <b>129</b> | PE-18:0/22:4       | 1.00 | 0.49 |
| <b>130</b> | PI-18:0/20:3       | 1.00 | 0.50 |
| <b>131</b> | PA-18:0/20:3       | 1.00 | 0.50 |
| <b>132</b> | DAG-18:0/20:4      | 1.00 | 0.49 |
| <b>133</b> | PS-16:0/18:1       | 1.00 | 0.50 |
| <b>134</b> | TAG-16:0/18:0/18:1 | 0.99 | 0.50 |
| <b>135</b> | PE-18:2/20:2       | 0.98 | 0.49 |
| <b>136</b> | PG-16:1/18:1       | 0.98 | 0.49 |
| <b>137</b> | PS-16:0/18:1       | 0.98 | 0.49 |
| <b>138</b> | SM-20:1            | 0.97 | 0.41 |

|     |                    |      |      |
|-----|--------------------|------|------|
| 139 | PC-36:8            | 0.93 | 0.29 |
| 140 | PE-16:1/22:2       | 0.93 | 0.40 |
| 141 | PG-16:0/20:3       | 0.92 | 0.47 |
| 142 | PS-18:1/20:3       | 0.92 | 0.45 |
| 143 | CE-18:2            | 0.91 | 0.42 |
| 144 | DAG-16:0/18:1      | 0.89 | 0.20 |
| 145 | PS-18:0/20:3       | 0.89 | 0.43 |
| 146 | PE-18:1/22:4       | 0.87 | 0.23 |
| 147 | PE-16:1/18:2       | 0.86 | 0.15 |
| 148 | CE-22:6            | 0.86 | 0.38 |
| 149 | CER-20:0           | 0.85 | 0.08 |
| 150 | PE-20:4/22:5       | 0.85 | 0.40 |
| 151 | PA-18:0/20:4       | 0.84 | 0.26 |
| 152 | SM-18:2            | 0.83 | 0.17 |
| 153 | PE-18:3/20:0       | 0.83 | 0.38 |
| 154 | PE-16:0/20:2       | 0.82 | 0.29 |
| 155 | TAG-16:0/16:1/17:0 | 0.81 | 0.32 |
| 156 | LPS-18:1           | 0.80 | 0.26 |
| 157 | PS-20:1/20:4       | 0.80 | 0.39 |
| 158 | PE-16:0/18:3       | 0.79 | 0.26 |
| 159 | PE-18:1/20:2       | 0.79 | 0.26 |
| 160 | PE-14:0/18:1       | 0.78 | 0.32 |
| 161 | PG-18:1/18:1       | 0.78 | 0.37 |
| 162 | PS-16:1/18:0       | 0.78 | 0.40 |
| 163 | PE-18:1/20:3       | 0.77 | 0.10 |
| 164 | LPC-20:3           | 0.77 | 0.16 |
| 165 | PG-18:1/18:2       | 0.76 | 0.37 |
| 166 | CE-18:1            | 0.76 | 0.18 |
| 167 | PE-18:2/18:2       | 0.76 | 0.37 |
| 168 | LPE-16:0           | 0.74 | 0.42 |
| 169 | PE-16:1/22:6       | 0.74 | 0.32 |
| 170 | PS-16:0/16:0       | 0.73 | 0.37 |
| 171 | PS-18:0/22:5       | 0.73 | 0.32 |
| 172 | PE-16:1/20:4       | 0.72 | 0.32 |
| 173 | LPC-22:1           | 0.71 | 0.16 |
| 174 | PC-32:1            | 0.71 | 0.01 |
| 175 | PC-34:1            | 0.70 | 0.00 |
| 176 | PE-18:3/20:1       | 0.70 | 0.10 |
| 177 | TAG-18:0/18:0/18:1 | 0.69 | 0.17 |
| 178 | PE-18:1/18:3       | 0.69 | 0.20 |
| 179 | PA-18:1/18:2       | 0.69 | 0.14 |
| 180 | PE-16:1/18:1       | 0.69 | 0.03 |
| 181 | PE-18:1/20:4       | 0.68 | 0.09 |
| 182 | CER-24:1           | 0.68 | 0.03 |
| 183 | DAG-16:1/18:1      | 0.68 | 0.04 |
| 184 | PC-30:1            | 0.67 | 0.03 |
| 185 | PC-30:0            | 0.67 | 0.05 |

|     |                    |      |      |
|-----|--------------------|------|------|
| 186 | PE-18:1/18:2       | 0.66 | 0.05 |
| 187 | PE-20:1/20:4       | 0.65 | 0.09 |
| 188 | PC-32:3            | 0.65 | 0.03 |
| 189 | TAG-18:0/18:1/18:1 | 0.65 | 0.16 |
| 190 | PC-28:2            | 0.63 | 0.01 |
| 191 | PC-40:6            | 0.62 | 0.00 |
| 192 | DAG-18:1/18:2      | 0.62 | 0.10 |
| 193 | CER-16:0           | 0.62 | 0.15 |
| 194 | PC-30:2            | 0.61 | 0.00 |
| 195 | PC-36:2            | 0.60 | 0.00 |
| 196 | PC-34:2            | 0.59 | 0.00 |
| 197 | DAG-16:0/18:2      | 0.59 | 0.07 |
| 198 | PC-32:2            | 0.59 | 0.00 |
| 199 | PE-18:2/20:1       | 0.59 | 0.12 |
| 200 | PC-38:2            | 0.59 | 0.00 |
| 201 | TAG-16:1/16:1/18:0 | 0.58 | 0.21 |
| 202 | PC-32:0            | 0.58 | 0.00 |
| 203 | DAG-18:1/18:1      | 0.57 | 0.00 |
| 204 | PC-34:5            | 0.57 | 0.00 |
| 205 | TAG-16:0/17:0/18:1 | 0.56 | 0.15 |
| 206 | PC-33:1            | 0.56 | 0.00 |
| 207 | PC-40:5            | 0.56 | 0.00 |
| 208 | TAG-14:0/16:0/18:1 | 0.56 | 0.08 |
| 209 | LPA-18:1           | 0.56 | 0.23 |
| 210 | PC-36:3            | 0.55 | 0.00 |
| 211 | PC-28:1            | 0.55 | 0.00 |
| 212 | PA-18:1/18:1       | 0.55 | 0.00 |
| 213 | DAG-16:0/20:3      | 0.52 | 0.08 |
| 214 | LPS-18:2           | 0.51 | 0.18 |
| 215 | PC-34:3            | 0.50 | 0.00 |
| 216 | PC-38:6            | 0.49 | 0.00 |
| 217 | TAG-17:0/18:1/18:1 | 0.49 | 0.22 |
| 218 | TAG-17:0/18:1/18:1 | 0.49 | 0.22 |
| 219 | PC-36:6            | 0.48 | 0.00 |
| 220 | LPS-20:3           | 0.47 | 0.02 |
| 221 | PE-16:0/22:5       | 0.46 | 0.13 |
| 222 | PC-38:3            | 0.46 | 0.00 |
| 223 | PC-36:5            | 0.46 | 0.00 |
| 224 | TAG-14:1/18:0/18:2 | 0.45 | 0.12 |
| 225 | LPA-20:5           | 0.45 | 0.08 |
| 226 | LPC-18:2           | 0.44 | 0.06 |
| 227 | TAG-15:0/16:0/18:1 | 0.44 | 0.01 |
| 228 | TAG-14:1/16:1/18:0 | 0.44 | 0.12 |
| 229 | LPA-16:1           | 0.43 | 0.03 |
| 230 | TAG-14:0/16:0/18:2 | 0.43 | 0.01 |
| 231 | PC-38:7            | 0.43 | 0.00 |
| 232 | PC-38:5            | 0.42 | 0.00 |

|     |                    |      |      |
|-----|--------------------|------|------|
| 233 | PG-16:1/20:3       | 0.42 | 0.14 |
| 234 | DAG-18:1/20:3      | 0.42 | 0.01 |
| 235 | PC-40:7            | 0.42 | 0.00 |
| 236 | TAG-16:1/17:0/18:1 | 0.42 | 0.06 |
| 237 | PG-18:2/18:2       | 0.42 | 0.10 |
| 238 | PE-16:1/16:1       | 0.42 | 0.01 |
| 239 | TAG-16:0/18:2/18:2 | 0.42 | 0.10 |
| 240 | TAG-16:0/16:0/18:2 | 0.41 | 0.12 |
| 241 | PC-38:4            | 0.40 | 0.00 |
| 242 | PC-40:4            | 0.39 | 0.00 |
| 243 | CE-16:1            | 0.39 | 0.02 |
| 244 | TAG-14:1/16:0/18:1 | 0.37 | 0.11 |
| 245 | PC-36:4            | 0.36 | 0.00 |
| 246 | TAG-14:0/17:0/18:1 | 0.36 | 0.09 |
| 247 | TAG-16:1/16:1/18:1 | 0.32 | 0.01 |
| 248 | TAG-16:0/17:0/18:2 | 0.31 | 0.02 |
| 249 | PA-16:1/18:1       | 0.31 | 0.01 |
| 250 | PC-34:4            | 0.31 | 0.00 |
| 251 | PG-14:0/18:1       | 0.29 | 0.11 |
| 252 | PG-18:1/18:3       | 0.28 | 0.14 |
| 253 | TAG-16:1/18:1/18:2 | 0.27 | 0.07 |
| 254 | TAG-16:1/18:1/18:2 | 0.27 | 0.07 |
| 255 | LPC-20:4           | 0.27 | 0.01 |
| 256 | TAG-16:0/18:1/18:1 | 0.27 | 0.00 |
| 257 | TAG-16:0/18:1/18:2 | 0.26 | 0.00 |
| 258 | TAG-18:1/18:1/22:6 | 0.24 | 0.01 |
| 259 | TAG-16:0/16:1/18:1 | 0.24 | 0.01 |
| 260 | TAG-18:0/18:2/18:2 | 0.24 | 0.01 |
| 261 | TAG-18:1/18:1/18:2 | 0.23 | 0.03 |
| 262 | TAG-14:0/16:1/18:1 | 0.23 | 0.02 |
| 263 | TAG-18:1/18:2/18:2 | 0.19 | 0.05 |
| 264 | TAG-16:1/18:1/18:1 | 0.19 | 0.01 |
| 265 | TAG-18:1/18:1/20:4 | 0.18 | 0.07 |
| 266 | TAG-18:1/18:1/18:1 | 0.18 | 0.01 |
| 267 | TAG-15:0/18:1/18:1 | 0.16 | 0.04 |
| 268 | TAG-16:1/16:1/16:1 | 0.13 | 0.05 |
| 269 | TAG-14:1/18:1/18:1 | 0.13 | 0.00 |
| 270 | TAG-18:2/18:2/18:2 | 0.11 | 0.02 |
| 271 | PE-16:0/20:5       | 0.10 | 0.05 |
| 272 | LPA-22:6           | 0.00 | 0.19 |
| 273 | CE-22:1            | 0.00 | 0.07 |

---

Mice were sacrificed at 18-week-old. Total lipids in the aortic media were extracted by Bligh & Dyer's Method and were analyzed with LC-MS/MS.

CE; choletseryl ester, DAG; CER; ceramide, diacylglycerol, LPA; lysophosphatidic acid; LPC; lysophosphatidylcholine, LPE; lysophosphatidyl ethanolamine, LPI; lysophosphatidylinsitol, LPS; lysophosphatidylserinePA; phosphatidic acid, PC; phosphatidylcholine, PE; phosphatidylethanolamine, PG; phosphatidylglycerol

Supplemental Table V. qPCR primer list

| Gene          | Primer Bank ID | Forward                  | Reverse                  |
|---------------|----------------|--------------------------|--------------------------|
| <i>Acat1</i>  | 26344029a1     | GAAACCGGCTGTCAAATCTGG    | TGTGACCATTTCTGTATGTGTCC  |
| <i>Acat2</i>  | 22122547a1     | ACAAGACAGACCTCTTCCCTC    | ATGGTTCGGAAATGTTGCACC    |
| <i>Agpat1</i> | 26352009a1     | TAAGATGGCCTTCTACAACGGC   | CCATACAGGTATTTGACGTGGAG  |
| <i>Agpat2</i> | 23956162a1     | CAGCCAGGTTCTACGCCAAG     | TGATGCTCATGTTATCCACGGT   |
| <i>Agpat3</i> | 27229278a1     | CTGCTTGCCCTACCTGAAGACC   | GATACGGCGGTATAGGTGCTT    |
| <i>Agpat4</i> | 27229064a1     | CCAGTTTCTATGTCACCTGGTC   | GCAGAGTCTGGCATTGATCTTG   |
| <i>Agpat5</i> | 27229077a1     | CACACGTACTCTATGCGCTAC    | AAGAAGAGCACCATGTTCTGG    |
| <i>Alp</i>    | 6671533a1      | CCAACCTTTTTGTGCCAGAGA    | GGCTACATTGGTGTGAGCTTTT   |
| <i>Atf3</i>   | 31542154a1     | GAGGATTTTGCTAACCTGACACC  | TTGACGGTAACTGACTCCAGC    |
| <i>Atf4</i>   | 6753128a1      | ATGGCGCTCTTCACGAAATC     | ACTGGTCTGAAGGGTTCATCAA   |
| <i>Awat1</i>  | 124487272c3    | AGAGTGTGCCTAACACCACC     | CCGAACGTGAAGGTAGGGAC     |
| <i>Awat2</i>  | 29244232a1     | TTGACTGGAAGACCCCTGAG     | TCACCATCTTGAGTGGGAAGTA   |
| <i>Chop</i>   | 31982415a1     | CTGGAAGCCTGGTATGAGGAT    | CAGGGTCAAGAGTAGTGAAGGT   |
| <i>Dgat1</i>  | 6753632a1      | TCCGTCCAGGGTGGTAGTG      | TGAACAAAGAATCTTGACAGACGA |
| <i>Dgat2</i>  | 16975490a1     | GCGCTACTTCCGAGACTACTT    | GGGCCTTATGCCAGGAAACT     |
| <i>Gadd34</i> | 6678978a1      | GAGGGACGCCCACTTTC        | TTACCAGAGACAGGGGTAGGT    |
| <i>Gpat1</i>  | 6680057a1      | ACAGTTGGCACAATAGACGTTT   | CCTTCCATTTCAAGTGTGCAGA   |
| <i>Gpat2</i>  | 26334109a1     | CACTGCTCCGAGGTTTTGATG    | AGGTTGGCAGCAATTCCATAC    |
| <i>Gpat3</i>  | 27370046a1     | GGCCTTCGGATTATCCCTGG     | CTTGGGGGCTCCTTTCTGAA     |
| <i>Gpat4</i>  | 30520301a1     | AGCTTGATTGTCAACCTCCTG    | CCGTTGGTGTAGGGCTTGT      |
| <i>GPAT4</i>  | 224451051c2    | GGTTAGGAGTGCTGATTCGGT    | CCAGAAGGCTAATCCCTGTGAA   |
| <i>Lclat1</i> | 295789099c1    | TTTTATGCTCGGCCCATTTT     | CACAAGACGGCTGCTAATCCA    |
| <i>Lipin1</i> | 27923911a1     | CTCCGCTCCCGAGAGAAAG      | TCATGTGCAAATCCACGGACT    |
| <i>Lipin2</i> | 31543129a1     | GAAGTGGCGGCTCTCTATTTT    | AGAGGGTTACATCAGGCAAGT    |
| <i>LIPIN2</i> | 22027649c1     | TCTACAAGGGCATTAAACCAGGC  | AACGTGAAAAGGTGAACACTGA   |
| <i>Lipin3</i> | 12584972a1     | CAAACCTCGTGGTGAATCAAC    | CCACAGTGCTCTCAGGTAAGT    |
| <i>Lpcat1</i> | 31542186a1     | GGCTCCTGTTTCGCTGCTTT     | TTACACAGCTACACGGTGAAG    |
| <i>Lpcat2</i> | 27370522a1     | CCCTTCGTCCAGCAGACTAC     | GCAGCAAATTTATCCAACCAGT   |
| <i>Lpcat3</i> | 21699058a1     | GACGGGGACATGGGAGAGA      | GTAAAACAGAGCCAACGGGTAG   |
| <i>Lpcat4</i> | 227496911c3    | CTCATCCGATACCCCAACAGT    | GGGAGGAACTCTACATCCACG    |
| <i>Mboat1</i> | 23956314a1     | AGCCTCTCTTACCGTACCACC    | GGCTGGCTTTACCAGGATGTA    |
| <i>Mboat2</i> | 12849991a1     | TCAGACACGTAGTTGCTACCC    | TGCAGTAGGAAATCCCCTTTG    |
| <i>Mboat7</i> | 31542014a1     | TACCGCACCTACCTGGATTG     | AGAAGACCGGGATCATGTAGAA   |
| <i>Mogat1</i> | 18426805a1     | TGGTGCCAGTTTGGTTCCAG     | TGCTCTGAGGTCGGGTTCA      |
| <i>Mogat2</i> | 28974982a1     | TGGGAGCGCAGGTTACAGA      | CAGGTGGCATAACAGGACAGA    |
| <i>Ocn</i>    | N/A            | GCAATAAGGTAGTGAACAGACTCC | GTTTGTAGGCGGTCTTCAAGC    |
| <i>Opn</i>    | 6678113a1      | AGCAAGAACTCTTCCAAGCAA    | GTGAGATTCGTCAGATTCATCCG  |
| <i>PiT1</i>   | 7657579a1      | TTTGACAACTTCTCTGTGGG     | GGACTTTCAGACGGACTAGACTT  |
| <i>SCD</i>    | 53759150c1     | TCTAGCTCCTATACCACCACCA   | TCGTCTCCAACCTTATCTCCTCC  |
| <i>Scd1</i>   | 31543675a1     | TTCTTGCGATACACTCTGGTGC   | CGGGATTGAATGTTCTTGTCTG   |
| <i>Scd2</i>   | 6677863a1      | GCATTTGGGAGCCTTGTACG     | AGCCGTGCCTTGTATGTTCTG    |
| <i>Scd3</i>   | 13277368a1     | GTTGCCACTTTACTGAGATACGC  | GAAGCCCTCGCCATACTT       |
| <i>Scd4</i>   | 34147292a1     | GCCCACTTGCCACAAGAGAT     | GTAGCTGGGGTCATACAGATCA   |
| <i>SCD5</i>   | 148596960c1    | TGCGACGCCAAGGAAGAAAT     | CCTCCAGACGATGTTCTGCC     |
| <i>Sm22</i>   | 6755714a1      | CAACAAGGGTCCATCTACGG     | ATCTGGGCGGCCTACATCA      |
| <i>Smmhc</i>  | 1945078a1      | GAGCAAACCTCAGGAGAGGAAAC  | GTCCCGAGCGTCCATTTCTTC    |



|               |            |                       |                        |
|---------------|------------|-----------------------|------------------------|
| <i>Sptlc1</i> | 29244577a1 | ACGAGGCTCCAGCATACCAT  | TCAGAACGCTCCTGCAACTTG  |
| <i>Sptlc2</i> | 6755656a1  | AACGGGGAAGTGAGGAACG   | CAGCATGGGTGTTTCTTCAAAG |
| <i>sXBP-1</i> | N/A        | GAGTCCGCAGCAGGTG      | GTGTCAGAGTCCATGGGA     |
| TetR          | N/A        | TGCTTAATGAGGTCGGAATCG | ATCTCAATGGCTAAGGCGTC   |

---

The primers for Ocn, sXBP-1 and TetR were designed in the laboratory.

Supplemental Table VI. 3200-Qtrpa spectrometer settings for lipidomic analysis

| Lipid Name |        | Q1 m/z     | Q3 m/z | DP | CE | EP | CXP | CEP |
|------------|--------|------------|--------|----|----|----|-----|-----|
|            | 14:0   | 404.389225 | 369.3  | 20 | 20 | 3  | 5   | 70  |
| CE         | 14:1   | 402.373325 | 369.3  | 20 | 20 | 3  | 5   | 70  |
| CE         | 15:0   | 628.6032   | 369.3  | 20 | 20 | 3  | 5   | 70  |
| CE         | 15:1   | 626.5873   | 369.3  | 20 | 20 | 3  | 5   | 70  |
| CE         | 16:0   | 642.6189   | 369.3  | 20 | 20 | 3  | 5   | 70  |
| CE         | 16:1   | 640.603    | 369.3  | 20 | 20 | 3  | 5   | 70  |
| CE         | 17:0   | 656.6345   | 369.3  | 20 | 20 | 3  | 5   | 70  |
| CE         | 17:1   | 654.6186   | 369.3  | 20 | 20 | 3  | 5   | 70  |
| CE         | 18:0   | 670.6502   | 369.3  | 20 | 20 | 3  | 5   | 70  |
| CE         | 18:1   | 668.6345   | 369.3  | 20 | 20 | 3  | 5   | 70  |
| CE         | 18:1   | 669.6345   | 370.3  | 20 | 20 | 3  | 5   | 70  |
| CE         | 18:2   | 666.6189   | 369.3  | 20 | 20 | 3  | 5   | 70  |
| CE         | 18:2   | 668.6      | 371.3  | 20 | 20 | 3  | 5   | 70  |
| CE         | 18:3   | 664.6032   | 369.3  | 20 | 20 | 3  | 5   | 70  |
| CE         | 18:3   | 665.6032   | 370.3  | 20 | 20 | 3  | 5   | 70  |
| CE         | 20:0   | 698.6815   | 369.3  | 20 | 20 | 3  | 5   | 70  |
| CE         | 20:1   | 696.6658   | 369.3  | 20 | 20 | 3  | 5   | 70  |
| CE         | 20:2   | 694.6502   | 369.3  | 20 | 20 | 3  | 5   | 70  |
| CE         | 20:3   | 692.6345   | 369.3  | 20 | 20 | 3  | 5   | 70  |
| CE         | 20:4   | 690.6189   | 369.3  | 20 | 20 | 3  | 5   | 70  |
| CE         | 20:4   | 690.6189   | 369.3  | 20 | 20 | 3  | 5   | 70  |
| CE         | 20:4   | 692.6189   | 371.3  | 20 | 20 | 3  | 5   | 70  |
| CE         | 20:5   | 688.6032   | 369.3  | 20 | 20 | 3  | 5   | 70  |
| CE         | 20:5   | 670.6032   | 371.3  | 20 | 20 | 3  | 5   | 70  |
| CE         | 22:0   | 726.7128   | 369.3  | 20 | 20 | 3  | 5   | 70  |
| CE         | 22:1   | 724.6969   | 369.3  | 20 | 20 | 3  | 5   | 70  |
| CE         | 22:2   | 722.6815   | 369.3  | 20 | 20 | 3  | 5   | 70  |
| CE         | 22:4   | 718.6502   | 369.3  | 20 | 20 | 3  | 5   | 70  |
| CE         | 22:5   | 716.6502   | 369.3  | 20 | 20 | 3  | 5   | 70  |
| CE         | 22:6   | 714.6183   | 369.3  | 20 | 20 | 3  | 5   | 70  |
| LPC        | 13:0   | 454.3      | 184.1  | 50 | 35 | 5  | 3   | 20  |
| LPC        | 13:0   | 455.3      | 185.1  | 50 | 35 | 5  | 3   | 20  |
| LPC        | 16:0e  | 482.3      | 184.1  | 50 | 35 | 5  | 3   | 20  |
| LPC        | 16:1   | 494.3      | 184.1  | 50 | 35 | 5  | 3   | 20  |
| LPC        | 16:0   | 496.3      | 184.1  | 50 | 35 | 5  | 3   | 20  |
| LPC        | 16:0   | 497.3      | 185.1  | 50 | 35 | 5  | 3   | 20  |
| LPC        | 18:2   | 520.3      | 184.1  | 50 | 35 | 5  | 3   | 20  |
| LPC        | 18:3   | 518.3      | 184.1  | 50 | 35 | 5  | 3   | 20  |
| LPC        | 18:1   | 522.4      | 184.1  | 50 | 35 | 5  | 3   | 20  |
| LPC        | 18:0   | 524.4      | 184.1  | 50 | 35 | 5  | 3   | 20  |
| LPC        | 18:0e  | 510.3      | 184.1  | 50 | 35 | 5  | 3   | 20  |
| LPC        | 20:0   | 552.4      | 184.1  | 50 | 35 | 5  | 3   | 20  |
| LPC        | o-20:0 | 538.4      | 104.1  | 50 | 35 | 5  | 3   | 20  |
| LPC        | 22:0   | 580.4      | 184.1  | 50 | 35 | 5  | 3   | 20  |
| LPC        | o-22:0 | 566.5      | 104.1  | 50 | 35 | 5  | 3   | 20  |

|     |        |       |       |    |    |   |   |    |
|-----|--------|-------|-------|----|----|---|---|----|
| LPC | 22:1   | 578.4 | 184.1 | 50 | 35 | 5 | 3 | 20 |
| LPC | 20:3   | 546.4 | 184.1 | 50 | 35 | 5 | 3 | 20 |
| LPC | 20:4   | 544.3 | 184.1 | 50 | 35 | 5 | 3 | 20 |
| LPC | 20:5   | 542.3 | 184.1 | 50 | 35 | 5 | 3 | 20 |
| LPC | 22:6   | 568.3 | 184.1 | 50 | 35 | 5 | 3 | 20 |
| LPC | 24:0   | 608.5 | 184.1 | 50 | 35 | 5 | 3 | 20 |
| LPC | o-24:0 | 594.5 | 104.1 | 50 | 35 | 5 | 3 | 20 |
| LPC | o-24:1 | 592.5 | 104.1 | 50 | 35 | 5 | 3 | 20 |
| LPC | o-24:2 | 590.5 | 104.1 | 50 | 35 | 5 | 3 | 20 |
| LPS | 13:0   | 456.2 | 271.2 | 25 | 25 | 5 | 4 | 16 |
| LPS | 16:1   | 496.3 | 311.3 | 25 | 25 | 5 | 4 | 16 |
| LPS | 16:0   | 498.3 | 313.3 | 25 | 25 | 5 | 4 | 16 |
| LPS | 18:2   | 522.3 | 337.3 | 25 | 25 | 5 | 4 | 16 |
| LPS | 18:1   | 524.3 | 339.3 | 25 | 25 | 5 | 4 | 16 |
| LPS | 18:0   | 546.3 | 341.3 | 25 | 25 | 5 | 4 | 16 |
| LPS | 20:3   | 528.3 | 343.3 | 25 | 25 | 5 | 4 | 16 |
| LPS | 20:4   | 526.3 | 341.3 | 25 | 25 | 5 | 4 | 16 |
| LPS | 20:5   | 524.3 | 339.3 | 25 | 25 | 5 | 4 | 16 |
| LPS | 22:6   | 570.3 | 341.3 | 25 | 25 | 5 | 4 | 16 |
| LPG | 13:0   | 443.3 | 254.3 | 20 | 20 | 8 | 4 | 15 |
| LPG | 16:1   | 483.3 | 294.3 | 20 | 20 | 8 | 4 | 15 |
| LPG | 16:0   | 485.3 | 296.3 | 20 | 20 | 8 | 4 | 15 |
| LPG | 18:2   | 509.3 | 320.3 | 20 | 20 | 8 | 4 | 15 |
| LPG | 18:1   | 511.3 | 322.3 | 20 | 20 | 8 | 4 | 15 |
| LPG | 18:0   | 513.3 | 324.3 | 20 | 20 | 8 | 4 | 15 |
| LPG | 20:3   | 535.3 | 346.3 | 20 | 20 | 8 | 4 | 15 |
| LPG | 20:4   | 533.3 | 344.3 | 20 | 20 | 8 | 4 | 15 |
| LPG | 20:5   | 531.3 | 342.3 | 20 | 20 | 8 | 4 | 15 |
| LPG | 22:6   | 557.3 | 368.3 | 20 | 20 | 8 | 4 | 15 |
| LPI | 13:0   | 548   | 241   | 18 | 30 | 3 | 3 | 20 |
| LPI | 16:1   | 586   | 241   | 18 | 30 | 3 | 3 | 20 |
| LPI | 16:0   | 588   | 241   | 18 | 30 | 3 | 3 | 20 |
| LPI | 18:2   | 614   | 241   | 18 | 30 | 3 | 3 | 20 |
| LPI | 18:1   | 616   | 241   | 18 | 30 | 3 | 3 | 20 |
| LPI | 18:0   | 618   | 241   | 18 | 30 | 3 | 3 | 20 |
| LPI | 20:3   | 640   | 241   | 18 | 30 | 3 | 3 | 20 |
| LPI | 20:4   | 638   | 241   | 18 | 30 | 3 | 3 | 20 |
| LPI | 20:5   | 636   | 241   | 18 | 30 | 3 | 3 | 20 |
| LPI | 22:6   | 662   | 241   | 18 | 30 | 3 | 3 | 20 |
| LPI | 13:0   | 548   | 271   | 10 | 30 | 3 | 3 | 20 |
| LPI | 16:1   | 586   | 309   | 10 | 30 | 3 | 3 | 20 |
| LPI | 16:0   | 588   | 311   | 10 | 30 | 3 | 3 | 20 |
| LPI | 18:2   | 614   | 337   | 10 | 30 | 3 | 3 | 20 |
| LPI | 18:1   | 616   | 339   | 10 | 30 | 3 | 3 | 20 |
| LPI | 18:0   | 618   | 341   | 10 | 30 | 3 | 3 | 20 |
| LPI | 20:3   | 640   | 363   | 10 | 30 | 3 | 3 | 20 |
| LPI | 20:4   | 638   | 361   | 10 | 30 | 3 | 3 | 20 |

|         |       |       |       |    |    |   |   |    |
|---------|-------|-------|-------|----|----|---|---|----|
| LPI     | 20:5  | 636   | 359   | 10 | 30 | 3 | 3 | 20 |
| LPI     | 22:6  | 662   | 385   | 10 | 30 | 3 | 3 | 20 |
| LPA     | 16:1  | 426.2 | 155   | 20 | 25 | 3 | 2 | 10 |
| LPA     | 16:0  | 428.2 | 155   | 20 | 25 | 3 | 2 | 10 |
| LPA     | 17:0  | 442.3 | 155   | 20 | 25 | 3 | 2 | 10 |
| LPA     | 18:2  | 452.3 | 155   | 20 | 25 | 3 | 2 | 10 |
| LPA     | 18:1  | 454.3 | 155   | 20 | 25 | 3 | 2 | 10 |
| LPA     | 18:0  | 456.3 | 155   | 20 | 25 | 3 | 2 | 10 |
| LPA     | 20:3  | 468.3 | 155   | 20 | 25 | 3 | 2 | 10 |
| LPA     | 20:4  | 476.3 | 155   | 20 | 25 | 3 | 2 | 10 |
| LPA     | 20:5  | 454.3 | 155   | 20 | 25 | 3 | 2 | 10 |
| LPA     | 22:6  | 483.3 | 155   | 20 | 25 | 3 | 2 | 10 |
| LPE     | 13:0  | 412.2 | 271.2 | 25 | 20 | 4 | 3 | 15 |
| LPE     | 16:0e | 440.3 | 299.3 | 25 | 20 | 4 | 3 | 15 |
| LPE     | 16:1  | 452.3 | 311.3 | 25 | 20 | 4 | 3 | 15 |
| LPE     | 16:0  | 454.3 | 313.3 | 25 | 20 | 4 | 3 | 15 |
| LPE     | 18:2  | 478.3 | 337.3 | 25 | 20 | 4 | 3 | 15 |
| LPE     | 18:3  | 476.3 | 335.3 | 25 | 20 | 4 | 3 | 15 |
| LPE     | 18:1  | 480.3 | 339.3 | 25 | 20 | 4 | 3 | 15 |
| LPE     | 18:0  | 482.3 | 341.3 | 25 | 20 | 4 | 3 | 15 |
| LPE     | 18:0e | 468.3 | 327.3 | 25 | 20 | 4 | 3 | 15 |
| LPE     | 20:0  | 510.3 | 369.3 | 25 | 20 | 4 | 3 | 15 |
| LPE     | 20:3  | 504.3 | 363.3 | 25 | 20 | 4 | 3 | 15 |
| LPE     | 20:4  | 502.3 | 361.3 | 25 | 20 | 4 | 3 | 15 |
| LPE     | 20:5  | 500.3 | 359.3 | 25 | 20 | 4 | 3 | 15 |
| LPE     | 22:6  | 530.3 | 389.3 | 25 | 20 | 4 | 3 | 15 |
| CER     | 12:0  | 482.6 | 264.4 | 40 | 35 | 5 | 3 | 25 |
| CER     | 16:0  | 538.7 | 264.4 | 40 | 35 | 5 | 3 | 25 |
| CER     | 18:0  | 566.7 | 264.4 | 40 | 35 | 5 | 3 | 25 |
| CER     | 20:0  | 594.7 | 264.4 | 40 | 35 | 5 | 3 | 25 |
| CER     | 24:1  | 648.9 | 264.4 | 40 | 35 | 5 | 3 | 25 |
| CER     | 24:0  | 650.9 | 264.4 | 40 | 35 | 5 | 3 | 25 |
| DHCer   | 16:0  | 540.7 | 266.4 | 40 | 35 | 5 | 3 | 25 |
| DHCer   | 18:0  | 568.7 | 266.4 | 40 | 35 | 5 | 3 | 25 |
| DHCer   | 24:1  | 650.9 | 266.4 | 40 | 35 | 5 | 3 | 25 |
| DHCer   | 24:0  | 652.9 | 266.4 | 40 | 35 | 5 | 3 | 25 |
| GlcCre  | 12:0  | 644.6 | 264.4 | 35 | 45 | 5 | 3 | 25 |
| GlcCre  | 16:0  | 700.7 | 264.4 | 35 | 45 | 5 | 3 | 25 |
| GlcCre  | 18:0  | 728.7 | 264.4 | 35 | 45 | 5 | 3 | 25 |
| GlcCre  | 20:0  | 756   | 264.4 | 35 | 45 | 5 | 3 | 25 |
| GlcCre  | 22:0  | 784   | 264.4 | 35 | 45 | 5 | 3 | 25 |
| GlcCre  | 24:1  | 810.9 | 264.4 | 35 | 45 | 5 | 3 | 25 |
| GlcCre  | 24:0  | 812   | 264.4 | 35 | 45 | 5 | 3 | 25 |
| Cer1P   | 12:0  | 562.6 | 264.4 | 40 | 45 | 5 | 3 | 25 |
| Cer1P   | 16:0  | 618.7 | 264.4 | 40 | 45 | 5 | 3 | 25 |
| Cer1P   | 24:0  | 730.9 | 264.4 | 40 | 45 | 5 | 3 | 25 |
| DHCer1P | 12:0  | 564.6 | 266.4 | 40 | 45 | 5 | 3 | 25 |

|         |      |       |       |    |    |   |   |    |
|---------|------|-------|-------|----|----|---|---|----|
| DHCer1P | 24:0 | 732.9 | 266.4 | 40 | 45 | 5 | 3 | 25 |
| SM      | 12:0 | 647.7 | 184.1 | 55 | 40 | 5 | 3 | 30 |
| SM      | 16:0 | 703.4 | 184.1 | 55 | 40 | 5 | 3 | 30 |
| SM      | 18:0 | 731.4 | 184.1 | 55 | 40 | 5 | 3 | 30 |
| SM      | 18:1 | 729.4 | 184.1 | 55 | 40 | 5 | 3 | 30 |
| SM      | 18:2 | 727.4 | 184.1 | 55 | 40 | 5 | 3 | 30 |
| SM      | 20:1 | 757.4 | 184.1 | 55 | 40 | 5 | 3 | 30 |
| SM      | 20:0 | 759.4 | 184.1 | 55 | 40 | 5 | 3 | 30 |
| SM      | 22:1 | 785.4 | 184.1 | 55 | 40 | 5 | 3 | 30 |
| SM      | 22:0 | 788   | 184.1 | 55 | 40 | 5 | 3 | 30 |
| SM      | 24:1 | 813.4 | 184.1 | 55 | 40 | 5 | 3 | 30 |
| SM      | 24:0 | 815   | 184.1 | 55 | 40 | 5 | 3 | 30 |
| DHSM    | 18:0 | 733.8 | 184.1 | 55 | 40 | 5 | 3 | 30 |
| DHSM    | 24:0 | 817.9 | 184.1 | 55 | 40 | 5 | 3 | 30 |
| PC      | 24:0 | 622.5 | 184.1 | 60 | 40 | 7 | 3 | 30 |
| PC      | 26:0 | 650.5 | 184.1 | 60 | 40 | 7 | 3 | 30 |
| PC      | 28:0 | 678.5 | 184.1 | 60 | 40 | 7 | 3 | 30 |
| PC      | 28:1 | 675.5 | 184.1 | 60 | 40 | 7 | 3 | 30 |
| PC      | 28:2 | 674.5 | 184.1 | 60 | 40 | 7 | 3 | 30 |
| PC      | 30:0 | 706.5 | 184.1 | 60 | 40 | 7 | 3 | 30 |
| PC      | 30:1 | 704.5 | 184.1 | 60 | 40 | 7 | 3 | 30 |
| PC      | 30:2 | 702.5 | 184.1 | 60 | 40 | 7 | 3 | 30 |
| PC      | 32:0 | 734.5 | 184.1 | 60 | 40 | 7 | 3 | 30 |
| PC      | 32:1 | 732.5 | 184.1 | 60 | 40 | 7 | 3 | 30 |
| PC      | 32:2 | 730.5 | 184.1 | 60 | 40 | 7 | 3 | 30 |
| PC      | 32:3 | 728.5 | 184.1 | 60 | 40 | 7 | 3 | 30 |
| PC      | 33:1 | 746.5 | 184.1 | 60 | 40 | 7 | 3 | 30 |
| PC      | 34:0 | 762.5 | 184.1 | 60 | 40 | 7 | 3 | 30 |
| PC      | 34:1 | 760.5 | 184.1 | 60 | 40 | 7 | 3 | 30 |
| PC      | 34:2 | 758.5 | 184.1 | 60 | 40 | 7 | 3 | 30 |
| PC      | 34:3 | 756.5 | 184.1 | 60 | 40 | 7 | 3 | 30 |
| PC      | 34:4 | 754.5 | 184.1 | 60 | 40 | 7 | 3 | 30 |
| PC      | 34:5 | 752.5 | 184.1 | 60 | 40 | 7 | 3 | 30 |
| PC      | 36:0 | 790.5 | 184.1 | 60 | 40 | 7 | 3 | 30 |
| PC      | 36:1 | 788.5 | 184.1 | 60 | 40 | 7 | 3 | 30 |
| PC      | 36:2 | 786.5 | 184.1 | 60 | 40 | 7 | 3 | 30 |
| PC      | 36:3 | 784.5 | 184.1 | 60 | 40 | 7 | 3 | 30 |
| PC      | 36:4 | 782.5 | 184.1 | 60 | 40 | 7 | 3 | 30 |
| PC      | 36:5 | 780.5 | 184.1 | 60 | 40 | 7 | 3 | 30 |
| PC      | 36:6 | 778.5 | 184.1 | 60 | 40 | 7 | 3 | 30 |
| PC      | 36:7 | 776.5 | 184.1 | 60 | 40 | 7 | 3 | 30 |
| PC      | 36:8 | 774.5 | 184.1 | 60 | 40 | 7 | 3 | 30 |
| PC      | 38:2 | 814.5 | 184.1 | 60 | 40 | 7 | 3 | 30 |
| PC      | 38:3 | 812.5 | 184.1 | 60 | 40 | 7 | 3 | 30 |
| PC      | 38:4 | 810.5 | 184.1 | 60 | 40 | 7 | 3 | 30 |
| PC      | 38:5 | 808.5 | 184.1 | 60 | 40 | 7 | 3 | 30 |
| PC      | 38:6 | 806.5 | 184.1 | 60 | 40 | 7 | 3 | 30 |

|    |           |       |       |    |    |   |   |    |
|----|-----------|-------|-------|----|----|---|---|----|
| PC | 38:7      | 804.5 | 184.1 | 60 | 40 | 7 | 3 | 30 |
| PC | 40:4      | 838.5 | 184.1 | 60 | 40 | 7 | 3 | 30 |
| PC | 40:5      | 836.5 | 184.1 | 60 | 40 | 7 | 3 | 30 |
| PC | 40:6      | 838.5 | 184.1 | 60 | 40 | 7 | 3 | 30 |
| PC | 40:7      | 836.5 | 184.1 | 60 | 40 | 7 | 3 | 30 |
| PC | o-30:0    | 692.5 | 184.1 | 60 | 40 | 7 | 3 | 30 |
| PC | o-32:0    | 720.5 | 184.1 | 60 | 40 | 7 | 3 | 30 |
| PC | o-32:1    | 718.5 | 184.1 | 60 | 40 | 7 | 3 | 30 |
| PC | o-32:2    | 716.5 | 184.1 | 60 | 40 | 7 | 3 | 30 |
| PC | o-34:0    | 748.5 | 184.1 | 60 | 40 | 7 | 3 | 30 |
| PC | o-34:1    | 746.5 | 184.1 | 60 | 40 | 7 | 3 | 30 |
| PC | o-34:2    | 744.5 | 184.1 | 60 | 40 | 7 | 3 | 30 |
| PC | o-34:3    | 742.5 | 184.1 | 60 | 40 | 7 | 3 | 30 |
| PC | o-34:4    | 740.5 | 184.1 | 60 | 40 | 7 | 3 | 30 |
| PC | o-36:0    | 776.5 | 184.1 | 60 | 40 | 7 | 3 | 30 |
| PC | o-36:1    | 774.5 | 184.1 | 60 | 40 | 7 | 3 | 30 |
| PC | o-36:2    | 772.5 | 184.1 | 60 | 40 | 7 | 3 | 30 |
| PC | o-36:3    | 770.5 | 184.1 | 60 | 40 | 7 | 3 | 30 |
| PC | o-36:4    | 768.5 | 184.1 | 60 | 40 | 7 | 3 | 30 |
| PC | o-36:5    | 766.5 | 184.1 | 60 | 40 | 7 | 3 | 30 |
| PC | o-38:4    | 795.3 | 184.1 | 60 | 40 | 7 | 3 | 30 |
| PC | o-38:5    | 793.5 | 184.1 | 60 | 40 | 7 | 3 | 30 |
| PC | o-38:6    | 791.5 | 184.1 | 60 | 40 | 7 | 3 | 30 |
| PC | o-40:6    | 820.5 | 184.1 | 60 | 40 | 7 | 3 | 30 |
| PC | o-40:7    | 818.5 | 184.1 | 60 | 40 | 7 | 3 | 30 |
| PC | 30p:0     | 690.5 | 184.1 | 60 | 40 | 7 | 3 | 30 |
| PC | 32p:0     | 718.5 | 184.1 | 60 | 40 | 7 | 3 | 30 |
| PC | 32p:1     | 716.5 | 184.1 | 60 | 40 | 7 | 3 | 30 |
| PC | 34p:0     | 746.5 | 184.1 | 60 | 40 | 7 | 3 | 30 |
| PC | 34p:1     | 744.5 | 184.1 | 60 | 40 | 7 | 3 | 30 |
| PC | 34p:2     | 742.5 | 184.1 | 60 | 40 | 7 | 3 | 30 |
| PC | 34p:3     | 740.5 | 184.1 | 60 | 40 | 7 | 3 | 30 |
| PC | 36p:0     | 774.5 | 184.1 | 60 | 40 | 7 | 3 | 30 |
| PC | 36p:1     | 772.5 | 184.1 | 60 | 40 | 7 | 3 | 30 |
| PC | 36p:2     | 770.5 | 184.1 | 60 | 40 | 7 | 3 | 30 |
| PC | 36p:3     | 768.5 | 184.1 | 60 | 40 | 7 | 3 | 30 |
| PC | 36p:4     | 766.5 | 184.1 | 60 | 40 | 7 | 3 | 30 |
| PC | 36p:5     | 764.5 | 184.1 | 60 | 40 | 7 | 3 | 30 |
| PC | 38p:4     | 794.5 | 184.1 | 60 | 40 | 7 | 3 | 30 |
| PC | 38p:5     | 792.5 | 184.1 | 60 | 40 | 7 | 3 | 30 |
| PC | 38p:6     | 790.5 | 184.1 | 60 | 40 | 7 | 3 | 30 |
| PC | 40p:5     | 820.5 | 184.1 | 60 | 40 | 7 | 3 | 30 |
| PC | 40p:6     | 818.5 | 184.1 | 60 | 40 | 7 | 3 | 30 |
| PE | 17:0/17:0 | 720.6 | 579.6 | 50 | 18 | 5 | 7 | 20 |
| PE | 32:2      | 688.5 | 547.5 | 50 | 18 | 5 | 7 | 20 |
| PE | 32:1      | 690.5 | 549.5 | 50 | 18 | 5 | 7 | 20 |
| PE | 32:0      | 692.5 | 551.5 | 50 | 18 | 5 | 7 | 20 |

|    |                   |       |       |    |    |   |   |    |
|----|-------------------|-------|-------|----|----|---|---|----|
| PE | 34:0              | 720.5 | 579.5 | 50 | 18 | 5 | 7 | 20 |
| PE | 34:1              | 718.5 | 577.5 | 50 | 18 | 5 | 7 | 20 |
| PE | 34:2              | 716.5 | 575.5 | 50 | 18 | 5 | 7 | 20 |
| PE | 34:3              | 714.5 | 573.5 | 50 | 18 | 5 | 7 | 20 |
| PE | 35:1              | 732.5 | 591.5 | 50 | 18 | 5 | 7 | 20 |
| PE | 35:2              | 730.5 | 589.5 | 50 | 18 | 5 | 7 | 20 |
| PE | 36:5              | 738.5 | 597.5 | 50 | 18 | 5 | 7 | 20 |
| PE | 36:4              | 740.5 | 599.5 | 50 | 18 | 5 | 7 | 20 |
| PE | 36:3              | 742.5 | 601.5 | 50 | 18 | 5 | 7 | 20 |
| PE | 36:2              | 744.5 | 603.5 | 50 | 18 | 5 | 7 | 20 |
| PE | 36:1              | 746.5 | 605.5 | 50 | 18 | 5 | 7 | 20 |
| PE | 38:7              | 762.5 | 621.5 | 50 | 18 | 5 | 7 | 20 |
| PE | 38:6              | 764.5 | 623.5 | 50 | 18 | 5 | 7 | 20 |
| PE | 38:5              | 766.5 | 625.5 | 50 | 18 | 5 | 7 | 20 |
| PE | 38:4              | 768.5 | 627.5 | 50 | 18 | 5 | 7 | 20 |
| PE | 38:3              | 770.5 | 629.5 | 50 | 18 | 5 | 7 | 20 |
| PE | 40:7              | 790.5 | 649.5 | 50 | 18 | 5 | 7 | 20 |
| PE | 40:6              | 792.5 | 651.5 | 50 | 18 | 5 | 7 | 20 |
| PE | 40:5              | 794.5 | 653.5 | 50 | 18 | 5 | 7 | 20 |
| PE | 40:4              | 796.5 | 655.5 | 50 | 18 | 5 | 7 | 20 |
| PE | 42p:3             | 810.5 | 669.5 | 50 | 18 | 5 | 7 | 20 |
| PE | 42p:2             | 812.5 | 671.5 | 50 | 18 | 5 | 7 | 20 |
| PE | 42:9              | 814.5 | 673.5 | 50 | 18 | 5 | 7 | 20 |
| PE | 42:8              | 816.5 | 675.5 | 50 | 18 | 5 | 7 | 20 |
| PE | 42:7              | 818.5 | 677.5 | 50 | 18 | 5 | 7 | 20 |
| PE | 42:6              | 820.5 | 679.5 | 50 | 18 | 5 | 7 | 20 |
| PE | 34p:2 (16:0/18:2) | 700.5 | 559.5 | 50 | 18 | 5 | 7 | 20 |
| PE | 34p:1 (16:0/18:1) | 702.5 | 561.5 | 50 | 18 | 5 | 7 | 20 |
| PE | 36p:4 (16:0/20:4) | 724.5 | 583.5 | 50 | 18 | 5 | 7 | 20 |
| PE | 36p:3 (16:0/20:3) | 726.5 | 585.5 | 50 | 18 | 5 | 7 | 20 |
| PE | 36p:2 (18:0/18:2) | 728.5 | 587.5 | 50 | 18 | 5 | 7 | 20 |
| PE | 36p:1 (18:0/18:1) | 730.5 | 589.5 | 50 | 18 | 5 | 7 | 20 |
| PE | 38p:6 (16:0/22:6) | 748.5 | 607.5 | 50 | 18 | 5 | 7 | 20 |
| PE | 38p:5 (16:0/22:5) | 750.5 | 609.5 | 50 | 18 | 5 | 7 | 20 |
| PE | 38p:4 (18:0/20:4) | 752.5 | 611.5 | 50 | 18 | 5 | 7 | 20 |
| PE | 40p:6 (18:0/22:6) | 776.5 | 635.5 | 50 | 18 | 5 | 7 | 20 |
| PE | 40p:5 (18:0/22:5) | 778.5 | 637.5 | 50 | 18 | 5 | 7 | 20 |
| PE | 40p:4 (20:0/20:4) | 780.5 | 639.5 | 50 | 18 | 5 | 7 | 20 |
| PE | 34o:1             | 704.6 | 563.6 | 50 | 18 | 5 | 7 | 20 |
| PE | 34o:2             | 702.5 | 561.5 | 50 | 18 | 5 | 7 | 20 |
| PE | 36o:1             | 732.5 | 591.5 | 50 | 18 | 5 | 7 | 20 |
| PE | 36o:2             | 730.5 | 589.5 | 50 | 18 | 5 | 7 | 20 |
| PE | 36o:3             | 728.6 | 587.6 | 50 | 18 | 5 | 7 | 20 |
| PE | 36o:4             | 726.5 | 585.5 | 50 | 18 | 5 | 7 | 20 |
| PE | 36o:5             | 724.5 | 583.5 | 50 | 18 | 5 | 7 | 20 |
| PE | 36o:6             | 722.5 | 581.5 | 50 | 18 | 5 | 7 | 20 |
| PE | 38o:4             | 754.6 | 613.6 | 50 | 18 | 5 | 7 | 20 |

|    |       |       |       |    |    |   |   |    |
|----|-------|-------|-------|----|----|---|---|----|
| PE | 38o:5 | 752.6 | 611.6 | 50 | 18 | 5 | 7 | 20 |
| PE | 40o:5 | 780.6 | 639.6 | 50 | 18 | 5 | 7 | 20 |
| PE | 40o:6 | 778.5 | 637.5 | 50 | 18 | 5 | 7 | 20 |
| PE | 40o:7 | 776.6 | 635.6 | 50 | 18 | 5 | 7 | 20 |
| PS | 32:0  | 736.5 | 551.5 | 60 | 18 | 7 | 8 | 40 |
| PS | 32:1  | 734.5 | 549.5 | 60 | 18 | 7 | 8 | 40 |
| PS | 34:0  | 764.5 | 579.5 | 60 | 18 | 7 | 8 | 40 |
| PS | 34:1  | 762.5 | 577.5 | 60 | 18 | 7 | 8 | 40 |
| PS | 36:2  | 788.5 | 603.5 | 60 | 18 | 7 | 8 | 40 |
| PS | 36:0  | 792.5 | 607.5 | 60 | 18 | 7 | 8 | 40 |
| PS | 36:1  | 790.5 | 605.5 | 60 | 18 | 7 | 8 | 40 |
| PS | 38:5  | 810.5 | 625.5 | 60 | 18 | 7 | 8 | 40 |
| PS | 38:4  | 812.5 | 627.5 | 60 | 18 | 7 | 8 | 40 |
| PS | 38:3  | 814.5 | 629.5 | 60 | 18 | 7 | 8 | 40 |
| PS | 40:7  | 834.5 | 649.5 | 60 | 18 | 7 | 8 | 40 |
| PS | 40:6  | 836.5 | 651.5 | 60 | 18 | 7 | 8 | 40 |
| PS | 40:5  | 838.5 | 653.5 | 60 | 18 | 7 | 8 | 40 |
| PS | 40:8  | 832.5 | 647.5 | 60 | 18 | 7 | 8 | 40 |
| PS | 40:4  | 840.5 | 655.5 | 60 | 18 | 7 | 8 | 40 |
| PI | 32:0  | 828.5 | 184.1 | 60 | 40 | 7 | 3 | 30 |
| PI | 32:1  | 826.5 | 184.1 | 60 | 40 | 7 | 3 | 30 |
| PI | 34:0  | 856.5 | 184.1 | 60 | 40 | 7 | 3 | 30 |
| PI | 34:3  | 850.5 | 184.1 | 60 | 40 | 7 | 3 | 30 |
| PI | 34:2  | 852.5 | 184.1 | 60 | 40 | 7 | 3 | 30 |
| PI | 34:1  | 854.5 | 184.1 | 60 | 40 | 7 | 3 | 30 |
| PI | 36:4  | 876.5 | 184.1 | 60 | 40 | 7 | 3 | 30 |
| PI | 36:3  | 878.5 | 184.1 | 60 | 40 | 7 | 3 | 30 |
| PI | 36:2  | 880.5 | 184.1 | 60 | 40 | 7 | 3 | 30 |
| PI | 36:1  | 882.5 | 184.1 | 60 | 40 | 7 | 3 | 30 |
| PI | 36:0  | 884.5 | 184.1 | 60 | 40 | 7 | 3 | 30 |
| PI | 38:6  | 900.5 | 184.1 | 60 | 40 | 7 | 3 | 30 |
| PI | 38:5  | 902.5 | 184.1 | 60 | 40 | 7 | 3 | 30 |
| PI | 38:4  | 904.5 | 184.1 | 60 | 40 | 7 | 3 | 30 |
| PI | 38:3  | 906.5 | 184.1 | 60 | 40 | 7 | 3 | 30 |
| PI | 38:2  | 908.5 | 184.1 | 60 | 40 | 7 | 3 | 30 |
| PI | 40:6  | 928.5 | 184.1 | 60 | 40 | 7 | 3 | 30 |
| PI | 40:5  | 930.5 | 184.1 | 60 | 40 | 7 | 3 | 30 |
| PI | 40:4  | 932.5 | 184.1 | 60 | 40 | 7 | 3 | 30 |
| PG | 32:0  | 740.5 | 551.5 | 25 | 18 | 5 | 8 | 25 |
| PG | 32:1  | 738.5 | 549.5 | 25 | 18 | 5 | 8 | 25 |
| PG | 34:0  | 768.6 | 579.6 | 25 | 18 | 5 | 8 | 25 |
| PG | 34:2  | 764.5 | 575.5 | 25 | 18 | 5 | 8 | 25 |
| PG | 34:1  | 766.5 | 577.5 | 25 | 18 | 5 | 8 | 25 |
| PG | 36:4  | 788.5 | 599.5 | 25 | 18 | 5 | 8 | 25 |
| PG | 36:3  | 790.5 | 601.5 | 25 | 18 | 5 | 8 | 25 |
| PG | 36:2  | 792.5 | 603.5 | 25 | 18 | 5 | 8 | 25 |
| PG | 36:1  | 794.5 | 605.5 | 25 | 18 | 5 | 8 | 25 |



|     |      |       |       |    |    |    |   |    |
|-----|------|-------|-------|----|----|----|---|----|
| PA  | 32:3 | 660.5 | 155   | 35 | 45 | 5  | 3 | 35 |
| PA  | 32:2 | 662.5 | 155   | 35 | 45 | 5  | 3 | 35 |
| PA  | 32:1 | 664.5 | 155   | 35 | 45 | 5  | 3 | 35 |
| PA  | 32:0 | 666.5 | 155   | 35 | 45 | 5  | 3 | 35 |
| PA  | 34:2 | 690.5 | 155   | 35 | 45 | 5  | 3 | 35 |
| PA  | 34:1 | 692.5 | 155   | 35 | 45 | 5  | 3 | 35 |
| PA  | 34:0 | 694.5 | 155   | 35 | 45 | 5  | 3 | 35 |
| PA  | 36:2 | 718.5 | 155   | 35 | 45 | 5  | 3 | 35 |
| PA  | 36:1 | 720.5 | 155   | 35 | 45 | 5  | 3 | 35 |
| PA  | 36:0 | 722.5 | 155   | 35 | 45 | 5  | 3 | 35 |
| PA  | 38:4 | 742.5 | 155   | 35 | 45 | 5  | 3 | 35 |
| FFA | 12:0 | 218.2 | 218.2 | 25 | 5  | 25 | 4 | 7  |
| FFA | 13:0 | 232.2 | 232.2 | 25 | 5  | 25 | 4 | 7  |
| FFA | 14:0 | 246.2 | 246.2 | 25 | 5  | 25 | 4 | 7  |
| FFA | 15:0 | 260.2 | 260.2 | 25 | 5  | 25 | 4 | 7  |
| FFA | 16:1 | 272.2 | 272.2 | 25 | 5  | 25 | 4 | 7  |
| FFA | 16:0 | 274.2 | 274.2 | 25 | 5  | 25 | 4 | 7  |
| FFA | 17:1 | 286.3 | 286.3 | 25 | 5  | 25 | 4 | 7  |
| FFA | 17:0 | 288.3 | 288.3 | 25 | 5  | 25 | 4 | 7  |
| FFA | 18:3 | 296.3 | 296.3 | 25 | 5  | 25 | 4 | 7  |
| FFA | 18:2 | 298.3 | 298.3 | 25 | 5  | 25 | 4 | 7  |
| FFA | 18:1 | 300.3 | 300.3 | 25 | 5  | 25 | 4 | 7  |
| FFA | 18:0 | 302.3 | 302.3 | 25 | 5  | 25 | 4 | 7  |
| FFA | 19:0 | 316.3 | 316.3 | 25 | 5  | 25 | 4 | 7  |
| FFA | 20:5 | 320.3 | 320.3 | 25 | 5  | 25 | 4 | 7  |
| FFA | 20:4 | 322.3 | 322.3 | 25 | 5  | 25 | 4 | 7  |
| FFA | 20:3 | 324.3 | 324.3 | 25 | 5  | 25 | 4 | 7  |
| FFA | 20:2 | 326.3 | 326.3 | 25 | 5  | 25 | 4 | 7  |
| FFA | 20:1 | 328.3 | 328.3 | 25 | 5  | 25 | 4 | 7  |
| FFA | 20:0 | 330.3 | 330.3 | 25 | 5  | 25 | 4 | 7  |
| FFA | 22:6 | 346.3 | 346.3 | 25 | 5  | 25 | 4 | 7  |
| FFA | 22:5 | 348.3 | 348.3 | 25 | 5  | 25 | 4 | 7  |
| FFA | 22:4 | 350.3 | 350.3 | 25 | 5  | 25 | 4 | 7  |
| FFA | 22:2 | 354.4 | 354.4 | 25 | 5  | 25 | 4 | 7  |
| FFA | 22:1 | 356.4 | 356.4 | 25 | 5  | 25 | 4 | 7  |
| FFA | 22:0 | 358.4 | 358.4 | 25 | 5  | 25 | 4 | 7  |
| FFA | 24:1 | 384.4 | 384.4 | 25 | 5  | 25 | 4 | 7  |
| FFA | 24:0 | 386.4 | 386.4 | 25 | 5  | 25 | 4 | 7  |
| MAG | 14:0 | 303.3 | 58.1  | 30 | 50 | 8  | 5 | 12 |
| MAG | 14:1 | 301.3 | 75.1  | 30 | 50 | 8  | 5 | 12 |
| MAG | 15:0 | 317.3 | 75.1  | 30 | 50 | 8  | 5 | 12 |
| MAG | 16:1 | 329.3 | 75.1  | 30 | 50 | 8  | 5 | 12 |
| MAG | 16:0 | 331.3 | 75.1  | 30 | 50 | 8  | 5 | 12 |
| MAG | 17:1 | 343.3 | 75.1  | 30 | 50 | 8  | 5 | 12 |
| MAG | 17:0 | 345.3 | 75.1  | 30 | 50 | 8  | 5 | 12 |
| MAG | 18:3 | 353.3 | 75.1  | 30 | 50 | 8  | 5 | 12 |
| MAG | 18:2 | 355.3 | 75.1  | 30 | 50 | 8  | 5 | 12 |

|     |      |       |       |    |    |    |   |    |
|-----|------|-------|-------|----|----|----|---|----|
| MAG | 18:1 | 357.3 | 75.1  | 30 | 50 | 8  | 5 | 12 |
| MAG | 18:0 | 359.3 | 75.1  | 30 | 50 | 8  | 5 | 12 |
| MAG | 19:0 | 373.4 | 75.1  | 30 | 50 | 8  | 5 | 12 |
| MAG | 20:5 | 377.3 | 75.1  | 30 | 50 | 8  | 5 | 12 |
| MAG | 20:4 | 379.3 | 75.1  | 30 | 50 | 8  | 5 | 12 |
| MAG | 20:3 | 381.3 | 75.1  | 30 | 50 | 8  | 5 | 12 |
| MAG | 20:2 | 383.3 | 75.1  | 30 | 50 | 8  | 5 | 12 |
| MAG | 20:1 | 385.4 | 75.1  | 30 | 50 | 8  | 5 | 12 |
| MAG | 20:0 | 387.4 | 75.1  | 30 | 50 | 8  | 5 | 12 |
| MAG | 22:6 | 403.3 | 75.1  | 30 | 50 | 8  | 5 | 12 |
| MAG | 22:5 | 405.3 | 75.1  | 30 | 50 | 8  | 5 | 12 |
| MAG | 22:4 | 403.3 | 75.1  | 30 | 50 | 8  | 5 | 12 |
| MAG | 22:2 | 411.4 | 75.1  | 30 | 50 | 8  | 5 | 12 |
| MAG | 22:1 | 413.4 | 75.1  | 30 | 50 | 8  | 5 | 12 |
| MAG | 22:0 | 415.4 | 75.1  | 30 | 50 | 8  | 5 | 12 |
| DAG | 30:0 | 558.5 | 313.3 | 20 | 32 | 3  | 5 | 20 |
| DAG | 32:1 | 584.5 | 285.3 | 20 | 32 | 3  | 5 | 20 |
| DAG | 32:2 | 582.5 | 285.3 | 20 | 32 | 3  | 5 | 20 |
| DAG | 30:0 | 558.5 | 299.3 | 20 | 32 | 3  | 5 | 20 |
| DAG | 32:0 | 586.5 | 313.3 | 20 | 32 | 3  | 5 | 20 |
| DAG | 34:0 | 614.6 | 341.3 | 20 | 32 | 3  | 5 | 20 |
| DAG | 34:1 | 612.6 | 339.3 | 20 | 32 | 3  | 5 | 20 |
| DAG | 34:2 | 610.6 | 313.3 | 20 | 32 | 3  | 5 | 20 |
| DAG | 36:3 | 636.6 | 313.3 | 20 | 32 | 3  | 5 | 20 |
| DAG | 36:4 | 634.5 | 313.3 | 20 | 32 | 3  | 5 | 20 |
| DAG | 38:6 | 660.6 | 313.3 | 20 | 32 | 3  | 5 | 20 |
| DAG | 38:6 | 658.5 | 313.3 | 20 | 32 | 3  | 5 | 20 |
| DAG | 34:1 | 612.6 | 311.3 | 20 | 32 | 3  | 5 | 20 |
| DAG | 34:2 | 610.5 | 339.3 | 20 | 32 | 3  | 5 | 20 |
| DAG | 34:0 | 614.6 | 327.3 | 20 | 32 | 3  | 5 | 20 |
| DAG | 36:0 | 642.6 | 341.3 | 20 | 32 | 3  | 5 | 20 |
| DAG | 36:1 | 640.6 | 339.3 | 20 | 32 | 3  | 5 | 20 |
| DAG | 36:2 | 638.6 | 341.3 | 20 | 32 | 3  | 5 | 20 |
| DAG | 38:4 | 662.6 | 341.3 | 20 | 32 | 3  | 5 | 20 |
| DAG | 40:6 | 686.6 | 341.3 | 20 | 32 | 3  | 5 | 20 |
| DAG | 36:2 | 638.6 | 339.3 | 20 | 32 | 3  | 5 | 20 |
| DAG | 36:3 | 636.6 | 339.3 | 20 | 32 | 3  | 5 | 20 |
| DAG | 36:4 | 634.6 | 339.3 | 20 | 32 | 3  | 5 | 20 |
| DAG | 38:4 | 662.6 | 339.3 | 20 | 32 | 3  | 5 | 20 |
| DAG | 38:5 | 660.6 | 339.3 | 20 | 32 | 3  | 5 | 20 |
| DAG | 40:7 | 684.6 | 339.3 | 20 | 32 | 3  | 5 | 20 |
| DAG | 36:4 | 634.5 | 337.3 | 20 | 32 | 3  | 5 | 20 |
| TAG | 48:1 | 822.8 | 523.5 | 60 | 32 | 10 | 6 | 25 |
| TAG | 48:2 | 820.8 | 547.5 | 60 | 32 | 10 | 6 | 25 |
| TAG | 48:2 | 820.8 | 521.5 | 60 | 32 | 10 | 6 | 25 |
| TAG | 48:3 | 818.8 | 521.5 | 60 | 32 | 10 | 6 | 25 |
| TAG | 49:1 | 836.8 | 537.5 | 60 | 32 | 10 | 6 | 25 |

|     |         |       |       |    |    |    |   |    |
|-----|---------|-------|-------|----|----|----|---|----|
| TAG | 50:1    | 850.8 | 605.6 | 60 | 32 | 10 | 6 | 25 |
| TAG | 50:4    | 844.8 | 599.6 | 60 | 32 | 10 | 6 | 25 |
| TAG | 48:2    | 820.8 | 577.6 | 60 | 32 | 10 | 6 | 25 |
| TAG | 48:2    | 820.8 | 549.5 | 60 | 32 | 10 | 6 | 25 |
| TAG | 50:3    | 846.8 | 603.6 | 60 | 32 | 10 | 6 | 25 |
| TAG | 50:3    | 846.8 | 547.5 | 60 | 32 | 10 | 6 | 25 |
| TAG | 45:0 IS | 782.7 | 523.4 | 60 | 32 | 10 | 6 | 25 |
| TAG | 49:1    | 836.8 | 577.5 | 60 | 32 | 10 | 6 | 25 |
| TAG | 51:2    | 862.8 | 603.5 | 60 | 32 | 10 | 6 | 25 |
| TAG | 48:0    | 824.8 | 551.5 | 60 | 32 | 10 | 6 | 25 |
| TAG | 50:0    | 852.8 | 551.5 | 60 | 32 | 10 | 6 | 25 |
| TAG | 50:1    | 850.8 | 551.5 | 60 | 32 | 10 | 6 | 25 |
| TAG | 50:2    | 848.8 | 551.5 | 60 | 32 | 10 | 6 | 25 |
| TAG | 49:1    | 836.8 | 563.5 | 60 | 32 | 10 | 6 | 25 |
| TAG | 50:2    | 848.8 | 549.5 | 60 | 32 | 10 | 6 | 25 |
| TAG | 51:0    | 866.8 | 593.6 | 60 | 32 | 10 | 6 | 25 |
| TAG | 51:1    | 864.8 | 565.5 | 60 | 32 | 10 | 6 | 25 |
| TAG | 51:2    | 862.8 | 589.6 | 60 | 32 | 10 | 6 | 25 |
| TAG | 52:1    | 878.8 | 577.5 | 60 | 32 | 10 | 6 | 25 |
| TAG | 52:2    | 876.8 | 603.6 | 60 | 32 | 10 | 6 | 25 |
| TAG | 52:3    | 874.8 | 577.6 | 60 | 32 | 10 | 6 | 25 |
| TAG | 52:4    | 872.8 | 599.6 | 60 | 32 | 10 | 6 | 25 |
| TAG | 48:3    | 818.8 | 547.5 | 60 | 32 | 10 | 6 | 25 |
| TAG | 50:2    | 848.8 | 547.5 | 60 | 32 | 10 | 6 | 25 |
| TAG | 50:3    | 847.8 | 576.5 | 60 | 32 | 10 | 6 | 25 |
| TAG | 51:2    | 862.8 | 563.5 | 60 | 32 | 10 | 6 | 25 |
| TAG | 52:3    | 874.8 | 603.5 | 60 | 32 | 10 | 6 | 25 |
| TAG | 52:4    | 872.8 | 573.6 | 60 | 32 | 10 | 6 | 25 |
| TAG | 53:2    | 890.8 | 603.6 | 60 | 32 | 10 | 6 | 25 |
| TAG | 51:0 IS | 866.8 | 579.6 | 60 | 32 | 10 | 6 | 25 |
| TAG | 54:0    | 908.9 | 607.6 | 60 | 32 | 10 | 6 | 25 |
| TAG | 54:1    | 906.9 | 607.6 | 60 | 32 | 10 | 6 | 25 |
| TAG | 54:2    | 904.9 | 603.6 | 60 | 32 | 10 | 6 | 25 |
| TAG | 54:4    | 900.8 | 599.5 | 60 | 32 | 10 | 6 | 25 |
| TAG | 54:3    | 902.9 | 603.6 | 60 | 32 | 10 | 6 | 25 |
| TAG | 54:4    | 900.9 | 603.7 | 60 | 32 | 10 | 6 | 25 |
| TAG | 56:6    | 924.9 | 603.6 | 60 | 32 | 10 | 6 | 25 |
| TAG | 58:8    | 948.9 | 603.7 | 60 | 32 | 10 | 6 | 25 |
| TAG | 54:5    | 898.9 | 599.6 | 60 | 32 | 10 | 6 | 25 |
| TAG | 54:6    | 896.9 | 599.6 | 60 | 32 | 10 | 6 | 25 |
| TAG | 56:8    | 920.9 | 599.6 | 60 | 32 | 10 | 6 | 25 |
| MHC | 16:0    | 700.6 | 264.3 | 40 | 35 | 5  | 3 | 25 |
| MHC | 18:0    | 728.6 | 264.3 | 40 | 35 | 5  | 3 | 25 |
| MHC | 20:0    | 756.6 | 264.3 | 40 | 35 | 5  | 3 | 25 |
| MHC | 22:0    | 784.7 | 264.3 | 40 | 35 | 5  | 3 | 25 |
| MHC | 24:0    | 812.7 | 264.3 | 40 | 35 | 5  | 3 | 25 |
| MHC | 24:1    | 810.7 | 264.3 | 40 | 35 | 5  | 3 | 25 |

|     |          |        |        |        |        |       |       |        |
|-----|----------|--------|--------|--------|--------|-------|-------|--------|
| DHC | 16:0     | 862.6  | 264.3  | 40     | 35     | 5     | 3     | 25     |
| DHC | 18:0     | 890.7  | 264.3  | 40     | 35     | 5     | 3     | 25     |
| DHC | 20:0     | 918.7  | 264.3  | 40     | 35     | 5     | 3     | 25     |
| DHC | 22:0     | 946.7  | 264.3  | 40     | 35     | 5     | 3     | 25     |
| DHC | 24:0     | 947.8  | 264.3  | 40     | 35     | 5     | 3     | 25     |
| DHC | 24:1     | 972.7  | 264.3  | 40     | 35     | 5     | 3     | 25     |
| THC | 17:0     | 1038.7 | 264.3  | 40     | 35     | 5     | 3     | 25     |
| THC | 16:0     | 1024.7 | 264.3  | 40     | 35     | 5     | 3     | 25     |
| THC | 18:0     | 1052.7 | 264.3  | 40     | 35     | 5     | 3     | 25     |
| THC | 20:0     | 1080.7 | 264.3  | 40     | 35     | 5     | 3     | 25     |
| THC | 22:0     | 1108.8 | 264.3  | 40     | 35     | 5     | 3     | 25     |
| THC | 24:0     | 1136.8 | 264.3  | 40     | 35     | 5     | 3     | 25     |
| THC | 24:1     | 1134.8 | 264.3  | 40     | 35     | 5     | 3     | 25     |
| GM3 | 16:0     | 1153.7 | 264.3  | 40     | 35     | 5     | 3     | 25     |
| GM3 | 18:0     | 1181.8 | 264.3  | 40     | 35     | 5     | 3     | 25     |
| GM3 | 20:0     | 1209.8 | 264.3  | 40     | 35     | 5     | 3     | 25     |
| GM3 | 22:0     | 1237.8 | 264.3  | 40     | 35     | 5     | 3     | 25     |
| GM3 | 24:0     | 1265.9 | 264.3  | 40     | 35     | 5     | 3     | 25     |
| GM3 | 24:1     | 1263.8 | 264.3  | 40     | 35     | 5     | 3     | 25     |
| LPS | LPS-13:0 | 454.20 | 153.00 | -30.00 | -35.00 | -6.00 | -5.00 | -18.00 |
| LPS | LPS-16:1 | 494.30 | 153.00 | -30.00 | -35.00 | -6.00 | -5.00 | -18.00 |
| LPS | LPS-16:0 | 496.30 | 153.00 | -30.00 | -35.00 | -6.00 | -5.00 | -18.00 |
| LPS | LPS-18:2 | 520.30 | 153.00 | -30.00 | -35.00 | -6.00 | -5.00 | -18.00 |
| LPS | LPS-18:1 | 522.30 | 153.00 | -30.00 | -35.00 | -6.00 | -5.00 | -18.00 |
| LPS | LPS-18:0 | 524.30 | 153.00 | -30.00 | -35.00 | -6.00 | -5.00 | -18.00 |
| LPS | LPS-20:3 | 546.30 | 153.00 | -30.00 | -35.00 | -6.00 | -5.00 | -18.00 |
| LPS | LPS-20:4 | 544.30 | 153.00 | -30.00 | -35.00 | -6.00 | -5.00 | -18.00 |
| LPS | LPS-20:5 | 542.30 | 153.00 | -30.00 | -35.00 | -6.00 | -5.00 | -18.00 |
| LPS | LPS-22:6 | 568.30 | 153.00 | -30.00 | -35.00 | -6.00 | -5.00 | -18.00 |
| LPI | LPI-13:0 | 529.20 | 213.20 | -55.00 | -43.00 | -6.00 | -5.00 | -18.00 |
| LPI | LPI-16:1 | 567.20 | 253.20 | -55.00 | -43.00 | -6.00 | -5.00 | -18.00 |
| LPI | LPI-16:0 | 569.20 | 255.20 | -55.00 | -43.00 | -6.00 | -5.00 | -18.00 |
| LPI | LPI-18:2 | 595.20 | 279.20 | -55.00 | -43.00 | -6.00 | -5.00 | -18.00 |
| LPI | LPI-18:1 | 597.20 | 281.40 | -55.00 | -43.00 | -6.00 | -5.00 | -18.00 |
| LPI | LPI-18:0 | 599.20 | 283.30 | -55.00 | -43.00 | -6.00 | -5.00 | -18.00 |
| LPI | LPI-20:3 | 621.20 | 305.20 | -55.00 | -43.00 | -6.00 | -5.00 | -18.00 |
| LPI | LPI-20:4 | 619.20 | 303.20 | -55.00 | -43.00 | -6.00 | -5.00 | -18.00 |
| LPI | LPI-20:5 | 617.20 | 301.20 | -55.00 | -43.00 | -6.00 | -5.00 | -18.00 |
| LPI | LPI-22:6 | 643.20 | 327.20 | -55.00 | -43.00 | -6.00 | -5.00 | -18.00 |
| LPA | LPA-16:1 | 407.20 | 153.00 | -40.00 | -30.00 | -6.00 | -5.00 | -18.00 |
| LPA | LPA-16:0 | 409.20 | 153.00 | -40.00 | -30.00 | -6.00 | -5.00 | -18.00 |
| LPA | LPA-17:0 | 423.30 | 153.00 | -40.00 | -30.00 | -6.00 | -5.00 | -18.00 |
| LPA | LPA-18:2 | 433.30 | 153.00 | -40.00 | -30.00 | -6.00 | -5.00 | -18.00 |
| LPA | LPA-18:1 | 435.30 | 153.00 | -40.00 | -30.00 | -6.00 | -5.00 | -18.00 |
| LPA | LPA-18:0 | 437.30 | 153.00 | -40.00 | -30.00 | -6.00 | -5.00 | -18.00 |
| LPA | LPA-20:3 | 459.30 | 153.00 | -40.00 | -30.00 | -6.00 | -5.00 | -18.00 |
| LPA | LPA-20:4 | 457.30 | 153.00 | -40.00 | -30.00 | -6.00 | -5.00 | -18.00 |

|     |           |        |        |        |        |       |       |        |
|-----|-----------|--------|--------|--------|--------|-------|-------|--------|
| LPA | LPA-20:5  | 455.30 | 153.00 | -40.00 | -30.00 | -6.00 | -5.00 | -18.00 |
| LPA | LPA-22:6  | 464.30 | 153.00 | -40.00 | -30.00 | -6.00 | -5.00 | -18.00 |
| LPE | LPE-13:0  | 410.20 | 213.20 | -35.00 | -30.00 | -6.00 | -5.00 | -18.00 |
| LPE | LPE-16:0e | 440.30 | 299.30 | -35.00 | -30.00 | -6.00 | -5.00 | -18.00 |
| LPE | LPE-16:1  | 452.30 | 253.20 | -35.00 | -30.00 | -6.00 | -5.00 | -18.00 |
| LPE | LPE-16:0  | 454.30 | 255.20 | -35.00 | -30.00 | -6.00 | -5.00 | -18.00 |
| LPE | LPE-18:2  | 478.30 | 279.20 | -35.00 | -30.00 | -6.00 | -5.00 | -18.00 |
| LPE | LPE-18:3  | 476.30 | 277.20 | -35.00 | -30.00 | -6.00 | -5.00 | -18.00 |
| LPE | LPE-18:1  | 480.30 | 281.40 | -35.00 | -30.00 | -6.00 | -5.00 | -18.00 |
| LPE | LPE-18:0  | 482.30 | 283.30 | -35.00 | -30.00 | -6.00 | -5.00 | -18.00 |
| LPE | LPE-18:0e | 468.30 | 327.30 | -35.00 | -30.00 | -6.00 | -5.00 | -18.00 |
| LPE | LPE-20:0  | 510.30 | 311.30 | -35.00 | -30.00 | -6.00 | -5.00 | -18.00 |
| LPE | LPE-20:3  | 504.30 | 305.20 | -35.00 | -30.00 | -6.00 | -5.00 | -18.00 |
| LPE | LPE-20:4  | 502.30 | 303.20 | -35.00 | -30.00 | -6.00 | -5.00 | -18.00 |
| LPE | LPE-20:5  | 500.30 | 301.20 | -35.00 | -30.00 | -6.00 | -5.00 | -18.00 |
| LPE | LPE-22:6  | 530.30 | 327.20 | -35.00 | -30.00 | -6.00 | -5.00 | -18.00 |
| LPG | LPG-13:0  | 441.30 | 213.20 | -40.00 | -35.00 | -6.00 | -5.00 | -18.00 |
| LPG | LPG-16:1  | 481.30 | 253.20 | -40.00 | -35.00 | -6.00 | -5.00 | -18.00 |
| LPG | LPG-16:0  | 483.30 | 255.20 | -40.00 | -35.00 | -6.00 | -5.00 | -18.00 |
| LPG | LPG-18:2  | 507.30 | 279.20 | -40.00 | -35.00 | -6.00 | -5.00 | -18.00 |
| LPG | LPG-18:1  | 509.30 | 281.40 | -40.00 | -35.00 | -6.00 | -5.00 | -18.00 |
| LPG | LPG-18:0  | 511.30 | 283.30 | -40.00 | -35.00 | -6.00 | -5.00 | -18.00 |
| LPG | LPG-20:3  | 533.30 | 305.20 | -40.00 | -35.00 | -6.00 | -5.00 | -18.00 |
| LPG | LPG-20:4  | 531.30 | 303.20 | -40.00 | -35.00 | -6.00 | -5.00 | -18.00 |
| LPG | LPG-20:5  | 529.30 | 301.20 | -40.00 | -35.00 | -6.00 | -5.00 | -18.00 |
| LPG | LPG-22:6  | 555.30 | 327.20 | -40.00 | -35.00 | -6.00 | -5.00 | -18.00 |
| PE  | 17:0/17:0 | 718.60 | 269.20 | -60.00 | -45.00 | -6.00 | -5.00 | -18.00 |
| PE  | 32:2      | 686.50 | 253.20 | -60.00 | -45.00 | -6.00 | -5.00 | -18.00 |
| PE  | 32:2      | 686.50 | 279.20 | -60.00 | -45.00 | -6.00 | -5.00 | -18.00 |
| PE  | 32:1      | 688.50 | 253.20 | -60.00 | -45.00 | -6.00 | -5.00 | -18.00 |
| PE  | 32:1      | 688.50 | 281.40 | -60.00 | -45.00 | -6.00 | -5.00 | -18.00 |
| PE  | 32:0      | 690.50 | 255.20 | -60.00 | -45.00 | -6.00 | -5.00 | -18.00 |
| PE  | 32:0      | 690.50 | 283.30 | -60.00 | -45.00 | -6.00 | -5.00 | -18.00 |
| PE  | 34:0      | 718.50 | 283.30 | -60.00 | -45.00 | -6.00 | -5.00 | -18.00 |
| PE  | 34:1      | 716.50 | 255.20 | -60.00 | -45.00 | -6.00 | -5.00 | -18.00 |
| PE  | 34:1      | 716.50 | 253.20 | -60.00 | -45.00 | -6.00 | -5.00 | -18.00 |
| PE  | 34:2      | 714.50 | 279.20 | -60.00 | -45.00 | -6.00 | -5.00 | -18.00 |
| PE  | 34:2      | 714.50 | 281.40 | -60.00 | -45.00 | -6.00 | -5.00 | -18.00 |
| PE  | 34:3      | 712.50 | 277.20 | -60.00 | -45.00 | -6.00 | -5.00 | -18.00 |
| PE  | 34:3      | 712.50 | 253.20 | -60.00 | -45.00 | -6.00 | -5.00 | -18.00 |
| PE  | 36:5      | 736.50 | 301.20 | -60.00 | -45.00 | -6.00 | -5.00 | -18.00 |
| PE  | 36:5      | 736.50 | 253.20 | -60.00 | -45.00 | -6.00 | -5.00 | -18.00 |
| PE  | 36:5      | 736.50 | 277.20 | -60.00 | -45.00 | -6.00 | -5.00 | -18.00 |
| PE  | 36:4      | 738.50 | 303.20 | -60.00 | -45.00 | -6.00 | -5.00 | -18.00 |
| PE  | 36:4      | 738.50 | 253.20 | -60.00 | -45.00 | -6.00 | -5.00 | -18.00 |
| PE  | 36:4      | 738.50 | 277.20 | -60.00 | -45.00 | -6.00 | -5.00 | -18.00 |
| PE  | 36:4      | 738.50 | 279.20 | -60.00 | -45.00 | -6.00 | -5.00 | -18.00 |

|    |      |        |        |        |        |       |       |        |
|----|------|--------|--------|--------|--------|-------|-------|--------|
| PE | 36:3 | 740.50 | 305.20 | -60.00 | -45.00 | -6.00 | -5.00 | -18.00 |
| PE | 36:3 | 740.50 | 307.30 | -60.00 | -45.00 | -6.00 | -5.00 | -18.00 |
| PE | 36:3 | 740.50 | 277.20 | -60.00 | -45.00 | -6.00 | -5.00 | -18.00 |
| PE | 36:3 | 740.50 | 281.40 | -60.00 | -45.00 | -6.00 | -5.00 | -18.00 |
| PE | 36:2 | 742.50 | 307.30 | -60.00 | -45.00 | -6.00 | -5.00 | -18.00 |
| PE | 36:2 | 742.50 | 253.20 | -60.00 | -45.00 | -6.00 | -5.00 | -18.00 |
| PE | 36:2 | 742.50 | 279.20 | -60.00 | -45.00 | -6.00 | -5.00 | -18.00 |
| PE | 36:2 | 742.50 | 281.40 | -60.00 | -45.00 | -6.00 | -5.00 | -18.00 |
| PE | 36:1 | 744.50 | 309.30 | -60.00 | -45.00 | -6.00 | -5.00 | -18.00 |
| PE | 36:1 | 744.50 | 253.20 | -60.00 | -45.00 | -6.00 | -5.00 | -18.00 |
| PE | 36:1 | 744.50 | 281.40 | -60.00 | -45.00 | -6.00 | -5.00 | -18.00 |
| PE | 38:7 | 760.50 | 327.20 | -60.00 | -45.00 | -6.00 | -5.00 | -18.00 |
| PE | 38:7 | 760.50 | 301.20 | -60.00 | -45.00 | -6.00 | -5.00 | -18.00 |
| PE | 38:7 | 760.50 | 277.20 | -60.00 | -45.00 | -6.00 | -5.00 | -18.00 |
| PE | 38:6 | 762.50 | 327.20 | -60.00 | -45.00 | -6.00 | -5.00 | -18.00 |
| PE | 38:6 | 762.50 | 281.40 | -60.00 | -45.00 | -6.00 | -5.00 | -18.00 |
| PE | 38:6 | 762.50 | 303.20 | -60.00 | -45.00 | -6.00 | -5.00 | -18.00 |
| PE | 38:6 | 762.50 | 277.20 | -60.00 | -45.00 | -6.00 | -5.00 | -18.00 |
| PE | 38:5 | 764.50 | 329.20 | -60.00 | -45.00 | -6.00 | -5.00 | -18.00 |
| PE | 38:5 | 764.50 | 331.30 | -60.00 | -45.00 | -6.00 | -5.00 | -18.00 |
| PE | 38:5 | 764.50 | 301.20 | -60.00 | -45.00 | -6.00 | -5.00 | -18.00 |
| PE | 38:5 | 764.50 | 281.40 | -60.00 | -45.00 | -6.00 | -5.00 | -18.00 |
| PE | 38:5 | 764.50 | 305.20 | -60.00 | -45.00 | -6.00 | -5.00 | -18.00 |
| PE | 38:5 | 764.50 | 277.20 | -60.00 | -45.00 | -6.00 | -5.00 | -18.00 |
| PE | 38:4 | 766.50 | 331.30 | -60.00 | -45.00 | -6.00 | -5.00 | -18.00 |
| PE | 38:4 | 766.50 | 303.20 | -60.00 | -45.00 | -6.00 | -5.00 | -18.00 |
| PE | 38:4 | 766.50 | 281.40 | -60.00 | -45.00 | -6.00 | -5.00 | -18.00 |
| PE | 38:4 | 766.50 | 307.30 | -60.00 | -45.00 | -6.00 | -5.00 | -18.00 |
| PE | 38:4 | 766.50 | 277.20 | -60.00 | -45.00 | -6.00 | -5.00 | -18.00 |
| PE | 38:3 | 768.50 | 335.30 | -60.00 | -45.00 | -6.00 | -5.00 | -18.00 |
| PE | 38:3 | 768.50 | 305.20 | -60.00 | -45.00 | -6.00 | -5.00 | -18.00 |
| PE | 38:3 | 768.50 | 281.40 | -60.00 | -45.00 | -6.00 | -5.00 | -18.00 |
| PE | 38:3 | 768.50 | 309.30 | -60.00 | -45.00 | -6.00 | -5.00 | -18.00 |
| PE | 38:3 | 768.50 | 277.20 | -60.00 | -45.00 | -6.00 | -5.00 | -18.00 |
| PE | 40:7 | 788.50 | 327.20 | -60.00 | -45.00 | -6.00 | -5.00 | -18.00 |
| PE | 40:7 | 788.50 | 331.30 | -60.00 | -45.00 | -6.00 | -5.00 | -18.00 |
| PE | 40:7 | 788.50 | 305.20 | -60.00 | -45.00 | -6.00 | -5.00 | -18.00 |
| PE | 40:6 | 790.50 | 327.20 | -60.00 | -45.00 | -6.00 | -5.00 | -18.00 |
| PE | 40:6 | 790.50 | 281.40 | -60.00 | -45.00 | -6.00 | -5.00 | -18.00 |
| PE | 40:6 | 790.50 | 331.30 | -60.00 | -45.00 | -6.00 | -5.00 | -18.00 |
| PE | 40:5 | 792.50 | 329.20 | -60.00 | -45.00 | -6.00 | -5.00 | -18.00 |
| PE | 40:5 | 792.50 | 281.40 | -60.00 | -45.00 | -6.00 | -5.00 | -18.00 |
| PE | 40:5 | 792.50 | 301.20 | -60.00 | -45.00 | -6.00 | -5.00 | -18.00 |
| PE | 40:5 | 792.50 | 303.20 | -60.00 | -45.00 | -6.00 | -5.00 | -18.00 |
| PE | 40:4 | 794.50 | 331.30 | -60.00 | -45.00 | -6.00 | -5.00 | -18.00 |
| PE | 40:4 | 794.50 | 303.20 | -60.00 | -45.00 | -6.00 | -5.00 | -18.00 |
| PE | 42:9 | 812.50 | 327.20 | -60.00 | -45.00 | -6.00 | -5.00 | -18.00 |

|    |                      |        |        |        |        |       |       |        |
|----|----------------------|--------|--------|--------|--------|-------|-------|--------|
| PE | 42:8                 | 814.50 | 331.30 | -60.00 | -45.00 | -6.00 | -5.00 | -18.00 |
| PE | 42:8                 | 814.50 | 327.20 | -60.00 | -45.00 | -6.00 | -5.00 | -18.00 |
| PE | 42:6                 | 818.50 | 327.20 | -60.00 | -45.00 | -6.00 | -5.00 | -18.00 |
| PE | PE-34p:2 (16:0/18:2) | 698.50 | 279.20 | -60.00 | -45.00 | -6.00 | -5.00 | -18.00 |
| PE | PE-34p:1 (16:0/18:1) | 700.50 | 281.40 | -60.00 | -45.00 | -6.00 | -5.00 | -18.00 |
| PE | PE-34p:1 (16:0/18:0) | 702.50 | 283.30 | -60.00 | -45.00 | -6.00 | -5.00 | -18.00 |
| PE | PE-36p:4 (16:0/20:4) | 722.50 | 303.20 | -60.00 | -45.00 | -6.00 | -5.00 | -18.00 |
| PE | PE-36p:3 (16:0/20:3) | 724.50 | 305.20 | -60.00 | -45.00 | -6.00 | -5.00 | -18.00 |
| PE | PE-36p:2 (18:0/18:2) | 726.50 | 279.20 | -60.00 | -45.00 | -6.00 | -5.00 | -18.00 |
| PE | PE-36p:1 (18:0/18:1) | 728.50 | 281.40 | -60.00 | -45.00 | -6.00 | -5.00 | -18.00 |
| PE | PE-36p:1 (18:0/18:0) | 730.50 | 283.30 | -60.00 | -45.00 | -6.00 | -5.00 | -18.00 |
| PE | PE-38p:6 (16:0/22:6) | 746.50 | 327.20 | -60.00 | -45.00 | -6.00 | -5.00 | -18.00 |
| PE | PE-38p:5 (16:0/22:5) | 748.50 | 329.20 | -60.00 | -45.00 | -6.00 | -5.00 | -18.00 |
| PE | PE-38p:4 (18:0/20:4) | 750.50 | 331.30 | -60.00 | -45.00 | -6.00 | -5.00 | -18.00 |
| PE | PE-40p:6 (18:0/22:6) | 774.50 | 327.20 | -60.00 | -45.00 | -6.00 | -5.00 | -18.00 |
| PE | PE-40p:5 (18:0/22:5) | 776.50 | 329.20 | -60.00 | -45.00 | -6.00 | -5.00 | -18.00 |
| PE | PE-40p:4 (20:0/20:4) | 778.50 | 303.20 | -60.00 | -45.00 | -6.00 | -5.00 | -18.00 |
| PS | PS-16:0/16:0         | 736.50 | 255.20 | -60.00 | -58.00 | -6.00 | -5.00 | -18.00 |
| PS | PS-14:0/18:0         | 736.50 | 283.30 | -60.00 | -58.00 | -6.00 | -5.00 | -18.00 |
| PS | PS-16:0/16:1         | 734.50 | 253.20 | -60.00 | -58.00 | -6.00 | -5.00 | -18.00 |
| PS | PS-14:0/18:1         | 734.50 | 281.40 | -60.00 | -58.00 | -6.00 | -5.00 | -18.00 |
| PS | PS-16:0/18:0         | 764.50 | 283.30 | -60.00 | -58.00 | -6.00 | -5.00 | -18.00 |
| PS | PS-17:0/17:0         | 764.50 | 269.20 | -60.00 | -58.00 | -6.00 | -5.00 | -18.00 |
| PS | PS-16:0/18:1         | 762.50 | 281.40 | -60.00 | -58.00 | -6.00 | -5.00 | -18.00 |
| PS | PS-16:0/18:1         | 762.50 | 255.20 | -60.00 | -58.00 | -6.00 | -5.00 | -18.00 |
| PS | PS-16:1/18:0         | 762.50 | 253.20 | -60.00 | -58.00 | -6.00 | -5.00 | -18.00 |
| PS | PS-16:1/18:0         | 762.50 | 283.40 | -60.00 | -58.00 | -6.00 | -5.00 | -18.00 |
| PS | PS-16:0/18:2         | 788.50 | 279.20 | -60.00 | -58.00 | -6.00 | -5.00 | -18.00 |
| PS | PS-16:0/18:2         | 788.50 | 255.20 | -60.00 | -58.00 | -6.00 | -5.00 | -18.00 |
| PS | PS-16:1/18:1         | 788.50 | 253.20 | -60.00 | -58.00 | -6.00 | -5.00 | -18.00 |
| PS | PS-16:0/18:0         | 792.50 | 283.30 | -60.00 | -58.00 | -6.00 | -5.00 | -18.00 |
| PS | PS-17:0/17:0         | 792.50 | 269.20 | -60.00 | -58.00 | -6.00 | -5.00 | -18.00 |
| PS | PS-16:0/18:1         | 790.50 | 281.40 | -60.00 | -58.00 | -6.00 | -5.00 | -18.00 |
| PS | PS-16:0/18:1         | 790.50 | 255.20 | -60.00 | -58.00 | -6.00 | -5.00 | -18.00 |
| PS | PS-16:1/18:0         | 790.50 | 253.20 | -60.00 | -58.00 | -6.00 | -5.00 | -18.00 |
| PS | PS-16:0/22:6         | 808.50 | 327.20 | -60.00 | -58.00 | -6.00 | -5.00 | -18.00 |
| PS | PS-16:0/22:5         | 810.50 | 329.20 | -60.00 | -58.00 | -6.00 | -5.00 | -18.00 |
| PS | PS-16:1/22:4         | 810.50 | 331.30 | -60.00 | -58.00 | -6.00 | -5.00 | -18.00 |
| PS | PS-18:1/20:4         | 810.50 | 303.20 | -60.00 | -58.00 | -6.00 | -5.00 | -18.00 |
| PS | PS-18:2/20:3         | 810.50 | 279.20 | -60.00 | -58.00 | -6.00 | -5.00 | -18.00 |
| PS | PS-16:0/22:4         | 812.50 | 255.20 | -60.00 | -58.00 | -6.00 | -5.00 | -18.00 |
| PS | PS-18:0/20:4         | 812.50 | 303.20 | -60.00 | -58.00 | -6.00 | -5.00 | -18.00 |
| PS | PS-18:0/20:4         | 812.50 | 283.40 | -60.00 | -58.00 | -6.00 | -5.00 | -18.00 |
| PS | PS-18:1/20:3         | 812.50 | 281.40 | -60.00 | -58.00 | -6.00 | -5.00 | -18.00 |
| PS | PS-18:0/20:3         | 814.50 | 305.20 | -60.00 | -58.00 | -6.00 | -5.00 | -18.00 |
| PS | PS-18:1/22:6         | 834.50 | 281.40 | -60.00 | -58.00 | -6.00 | -5.00 | -18.00 |
| PS | PS-18:0/22:6         | 836.50 | 327.20 | -60.00 | -58.00 | -6.00 | -5.00 | -18.00 |

|    |              |        |        |        |        |       |       |        |
|----|--------------|--------|--------|--------|--------|-------|-------|--------|
| PS | PS-18:1/22:5 | 836.50 | 329.20 | -60.00 | -58.00 | -6.00 | -5.00 | -18.00 |
| PS | PS-18:2/22:4 | 836.50 | 331.30 | -60.00 | -58.00 | -6.00 | -5.00 | -18.00 |
| PS | PS-18:0/22:5 | 838.50 | 329.20 | -60.00 | -58.00 | -6.00 | -5.00 | -18.00 |
| PS | PS-18:1/22;4 | 838.50 | 281.40 | -60.00 | -58.00 | -6.00 | -5.00 | -18.00 |
| PS | PS-20:0/20:5 | 838.50 | 301.20 | -60.00 | -58.00 | -6.00 | -5.00 | -18.00 |
| PS | PS-20;1/20:4 | 838.50 | 309.30 | -60.00 | -58.00 | -6.00 | -5.00 | -18.00 |
| PS | PS-18:2/22:6 | 832.50 | 327.20 | -60.00 | -58.00 | -6.00 | -5.00 | -18.00 |
| PS | PS-18:3/22:5 | 832.50 | 277.20 | -60.00 | -58.00 | -6.00 | -5.00 | -18.00 |
| PS | PS-20:4/20:4 | 832.50 | 303.20 | -60.00 | -58.00 | -6.00 | -5.00 | -18.00 |
| PS | PS-18:0/22:4 | 840.50 | 331.30 | -60.00 | -58.00 | -6.00 | -5.00 | -18.00 |
| PS | PS-20:0/20:4 | 840.50 | 303.20 | -60.00 | -58.00 | -6.00 | -5.00 | -18.00 |
| PS | PS-20:1/20:3 | 840.50 | 309.30 | -60.00 | -58.00 | -6.00 | -5.00 | -18.00 |
| PI | PI-16:0/16:0 | 809.50 | 255.20 | -55.00 | -43.00 | -6.00 | -5.00 | -18.00 |
| PI | PI-18:0/18:0 | 865.60 | 283.30 | -55.00 | -43.00 | -6.00 | -5.00 | -18.00 |
| PI | PI-16:0/20:4 | 857.50 | 303.20 | -55.00 | -43.00 | -6.00 | -5.00 | -18.00 |
| PI | PI-20:0/18:2 | 908.50 | 311.30 | -55.00 | -43.00 | -6.00 | -5.00 | -18.00 |
| PI | PI-18:0/20:3 | 887.60 | 305.20 | -55.00 | -43.00 | -6.00 | -5.00 | -18.00 |
| PI | PI-18:0/20:4 | 885.50 | 303.20 | -55.00 | -43.00 | -6.00 | -5.00 | -18.00 |
| PI | PI-16:0/22:6 | 900.50 | 327.20 | -55.00 | -43.00 | -6.00 | -5.00 | -18.00 |
| PI | PI-20:4/20:4 | 905.50 | 331.30 | -55.00 | -43.00 | -6.00 | -5.00 | -18.00 |
| PI | PI-18:0/22:6 | 909.50 | 303.20 | -55.00 | -43.00 | -6.00 | -5.00 | -18.00 |
| PI | PI-18:0/22:5 | 911.60 | 329.20 | -55.00 | -43.00 | -6.00 | -5.00 | -18.00 |
| PI | PI-18:0/22:4 | 913.60 | 283.30 | -55.00 | -43.00 | -6.00 | -5.00 | -18.00 |
| PG | PG-14:0/18:0 | 721.50 | 283.30 | -70.00 | -50.00 | -6.00 | -5.00 | -18.00 |
| PG | PG-16:0/16:0 | 721.50 | 255.20 | -70.00 | -50.00 | -6.00 | -5.00 | -18.00 |
| PG | PG-14:0/18:1 | 719.50 | 281.40 | -70.00 | -50.00 | -6.00 | -5.00 | -18.00 |
| PG | PG-16:0/16:1 | 719.50 | 253.20 | -70.00 | -50.00 | -6.00 | -5.00 | -18.00 |
| PG | PG-16:0/18:0 | 749.50 | 255.20 | -70.00 | -50.00 | -6.00 | -5.00 | -18.00 |
| PG | PG-17:0/17:0 | 749.50 | 269.20 | -70.00 | -50.00 | -6.00 | -5.00 | -18.00 |
| PG | PG-16:0/18:2 | 745.50 | 279.20 | -70.00 | -50.00 | -6.00 | -5.00 | -18.00 |
| PG | PG-16:1/18:1 | 745.50 | 281.40 | -70.00 | -50.00 | -6.00 | -5.00 | -18.00 |
| PG | PG-16:0/18:1 | 747.50 | 255.20 | -70.00 | -50.00 | -6.00 | -5.00 | -18.00 |
| PG | PG-16:1/18:0 | 747.50 | 283.30 | -70.00 | -50.00 | -6.00 | -5.00 | -18.00 |
| PG | PG-16:0/20:4 | 769.50 | 303.20 | -70.00 | -50.00 | -6.00 | -5.00 | -18.00 |
| PG | PG-16:1/20:3 | 769.50 | 253.20 | -70.00 | -50.00 | -6.00 | -5.00 | -18.00 |
| PG | PG-18:1/18:3 | 769.50 | 277.20 | -70.00 | -50.00 | -6.00 | -5.00 | -18.00 |
| PG | PG-18:2/18:2 | 769.50 | 279.20 | -70.00 | -50.00 | -6.00 | -5.00 | -18.00 |
| PG | PG-16:0/20:3 | 771.50 | 305.20 | -70.00 | -50.00 | -6.00 | -5.00 | -18.00 |
| PG | PG-18:0/18:3 | 771.50 | 283.30 | -70.00 | -50.00 | -6.00 | -5.00 | -18.00 |
| PG | PG-18:1/18:2 | 771.50 | 279.20 | -70.00 | -50.00 | -6.00 | -5.00 | -18.00 |
| PG | PG-16:1/20:1 | 773.50 | 309.20 | -70.00 | -50.00 | -6.00 | -5.00 | -18.00 |
| PG | PG-18:0/18:2 | 773.50 | 279.20 | -70.00 | -50.00 | -6.00 | -5.00 | -18.00 |
| PG | PG-18:1/18:1 | 773.50 | 281.40 | -70.00 | -50.00 | -6.00 | -5.00 | -18.00 |
| PG | PG-16:0/20:1 | 775.50 | 309.20 | -70.00 | -50.00 | -6.00 | -5.00 | -18.00 |
| PG | PG-16:1/20:0 | 775.50 | 253.20 | -70.00 | -50.00 | -6.00 | -5.00 | -18.00 |
| PA | PA-14:0/18:3 | 641.1  | 277.20 | -60.00 | -48.00 | -6.00 | -5.00 | -18.00 |
| PA | PA-14:0/18:2 | 643.1  | 279.20 | -60.00 | -48.00 | -6.00 | -5.00 | -18.00 |



|     |              |        |        |        |        |       |       |        |
|-----|--------------|--------|--------|--------|--------|-------|-------|--------|
| PA  | PA-14:0/18:1 | 645.1  | 281.40 | -60.00 | -48.00 | -6.00 | -5.00 | -18.00 |
| PA  | PA-16:0/16:1 | 645.1  | 253.20 | -60.00 | -48.00 | -6.00 | -5.00 | -18.00 |
| PA  | PA-14:0/18:0 | 647.1  | 227.20 | -60.00 | -48.00 | -6.00 | -5.00 | -18.00 |
| PA  | PA-16:0/16:0 | 647.1  | 255.20 | -60.00 | -48.00 | -6.00 | -5.00 | -18.00 |
| PA  | PA-16:0/18:2 | 671.1  | 279.20 | -60.00 | -48.00 | -6.00 | -5.00 | -18.00 |
| PA  | PA-16:1/18:1 | 671.1  | 253.20 | -60.00 | -48.00 | -6.00 | -5.00 | -18.00 |
| PA  | PA-16:1/18:0 | 673.1  | 253.20 | -60.00 | -48.00 | -6.00 | -5.00 | -18.00 |
| PA  | PA-16:0/18:1 | 673.1  | 281.40 | -60.00 | -48.00 | -6.00 | -5.00 | -18.00 |
| PA  | PA-14:0/20:0 | 675.1  | 311.30 | -60.00 | -48.00 | -6.00 | -5.00 | -18.00 |
| PA  | PA-16:0/18:0 | 675.1  | 255.20 | -60.00 | -48.00 | -6.00 | -5.00 | -18.00 |
| PA  | PA-17:0/17:0 | 675.1  | 269.20 | -60.00 | -48.00 | -6.00 | -5.00 | -18.00 |
| PA  | PA-16:0/20:2 | 699.1  | 307.30 | -60.00 | -48.00 | -6.00 | -5.00 | -18.00 |
| PA  | PA-16:1/20:1 | 699.1  | 253.20 | -60.00 | -48.00 | -6.00 | -5.00 | -18.00 |
| PA  | PA-18:0/18:2 | 699.1  | 279.20 | -60.00 | -48.00 | -6.00 | -5.00 | -18.00 |
| PA  | PA-18:1/18:1 | 699.1  | 281.40 | -60.00 | -48.00 | -6.00 | -5.00 | -18.00 |
| PA  | PA-16:0/20:1 | 701.1  | 309.30 | -60.00 | -48.00 | -6.00 | -5.00 | -18.00 |
| PA  | PA-16:1/20:0 | 701.1  | 253.20 | -60.00 | -48.00 | -6.00 | -5.00 | -18.00 |
| PA  | PA-18:0/18:1 | 701.1  | 281.40 | -60.00 | -48.00 | -6.00 | -5.00 | -18.00 |
| PA  | PA-16:0/20:0 | 703.1  | 311.30 | -60.00 | -48.00 | -6.00 | -5.00 | -18.00 |
| PA  | PA-18:0/18:0 | 703.1  | 283.30 | -60.00 | -48.00 | -6.00 | -5.00 | -18.00 |
| PA  | PA-18:0/20:4 | 723.1  | 303.20 | -60.00 | -48.00 | -6.00 | -5.00 | -18.00 |
| PA  | PA-18:1/20:3 | 723.1  | 283.30 | -60.00 | -48.00 | -6.00 | -5.00 | -18.00 |
| PA  | PA-32:3      | 641.0  | 153.00 | -60.00 | -48.00 | -6.00 | -5.00 | -18.00 |
| PA  | PA-32:2      | 643.0  | 153.00 | -60.00 | -48.00 | -6.00 | -5.00 | -18.00 |
| PA  | PA-32:1      | 645.0  | 153.00 | -60.00 | -48.00 | -6.00 | -5.00 | -18.00 |
| PA  | PA-32:0      | 647.0  | 153.00 | -60.00 | -48.00 | -6.00 | -5.00 | -18.00 |
| PA  | PA-34:2      | 671.1  | 153.00 | -60.00 | -48.00 | -6.00 | -5.00 | -18.00 |
| PA  | PA-34:1      | 673.1  | 153.00 | -60.00 | -48.00 | -6.00 | -5.00 | -18.00 |
| PA  | PA-34:0      | 675.1  | 153.00 | -60.00 | -48.00 | -6.00 | -5.00 | -18.00 |
| PA  | PA-36:2      | 699.1  | 153.00 | -60.00 | -48.00 | -6.00 | -5.00 | -18.00 |
| PA  | PA-36:1      | 701.1  | 153.00 | -60.00 | -48.00 | -6.00 | -5.00 | -18.00 |
| PA  | PA-36:0      | 703.1  | 153.00 | -60.00 | -48.00 | -6.00 | -5.00 | -18.00 |
| PA  | PA-38:4      | 723.1  | 153.00 | -60.00 | -48.00 | -6.00 | -5.00 | -18.00 |
| FFA | 12:0         | 199.10 | 181.10 | -40.00 | -25.00 | -6.00 | -5.00 | -18.00 |
| FFA | 14:0         | 227.10 | 183.10 | -35.00 | -20.00 | -6.00 | -5.00 | -18.00 |
| FFA | 14:1         | 225.10 | 207.10 | -50.00 | -20.00 | -6.00 | -5.00 | -18.00 |
| FFA | 15:0         | 241.10 | 197.10 | -25.00 | -20.00 | -6.00 | -5.00 | -18.00 |
| FFA | 16:0         | 255.10 | 237.10 | -45.00 | -22.00 | -6.00 | -5.00 | -18.00 |
| FFA | 16:1         | 253.10 | 209.20 | -35.00 | -20.00 | -6.00 | -5.00 | -18.00 |
| FFA | 17:0         | 269.20 | 251.20 | -50.00 | -28.00 | -6.00 | -5.00 | -18.00 |
| FFA | 18:3         | 277.20 | 233.20 | -50.00 | -20.00 | -6.00 | -5.00 | -18.00 |
| FFA | 18:3         | 277.20 | 259.10 | -45.00 | -20.00 | -6.00 | -5.00 | -18.00 |
| FFA | 18:2         | 279.20 | 261.20 | -55.00 | -20.00 | -6.00 | -5.00 | -18.00 |
| FFA | 18:1         | 281.20 | 263.20 | -40.00 | -25.00 | -6.00 | -5.00 | -18.00 |
| FFA | 18:0         | 283.30 | 265.10 | -53.00 | -28.00 | -6.00 | -5.00 | -18.00 |
| FFA | 20:5         | 301.20 | 257.20 | -45.00 | -18.00 | -6.00 | -5.00 | -18.00 |
| FFA | 20:4         | 303.20 | 285.20 | -45.00 | -20.00 | -6.00 | -5.00 | -18.00 |

|     |      |        |        |        |        |       |       |        |
|-----|------|--------|--------|--------|--------|-------|-------|--------|
| FFA | 20:3 | 305.20 | 241.20 | -65.00 | -25.00 | -6.00 | -5.00 | -18.00 |
| FFA | 20:3 | 305.20 | 287.20 | -55.00 | -30.00 | -6.00 | -5.00 | -18.00 |
| FFA | 20:2 | 307.10 | 241.30 | -65.00 | -25.00 | -6.00 | -5.00 | -18.00 |
| FFA | 20:2 | 309.20 | 241.10 | -42.00 | -25.00 | -6.00 | -5.00 | -18.00 |
| FFA | 20:0 | 311.30 | 182.00 | -65.00 | -45.00 | -6.00 | -5.00 | -18.00 |
| FFA | 22:6 | 327.20 | 283.20 | -47.00 | -17.00 | -6.00 | -5.00 | -18.00 |
| FFA | 22:5 | 329.20 | 285.20 | -50.00 | -17.00 | -6.00 | -5.00 | -18.00 |
| FFA | 22:4 | 331.20 | 287.20 | -55.00 | -18.00 | -6.00 | -5.00 | -18.00 |
| FFA | 22:2 | 335.20 | 269.20 | -65.00 | -30.00 | -6.00 | -5.00 | -18.00 |
| FFA | 22:1 | 337.20 | 268.70 | -45.00 | -25.00 | -6.00 | -5.00 | -18.00 |
| FFA | 22:0 | 339.20 | 182.90 | -60.00 | -30.00 | -6.00 | -5.00 | -18.00 |
| FFA | 24;0 | 365.30 | 255.10 | -45.00 | -35.00 | -6.00 | -5.00 | -18.00 |
| FFA | 24:1 | 367.30 | 349.40 | -50.00 | -35.00 | -6.00 | -5.00 | -18.00 |

---

DP;Declustering potential

CE; Collision energy

EP; Entrance potential

CXP; Collision cell exit potential

CEP; Collision cell entrance potential

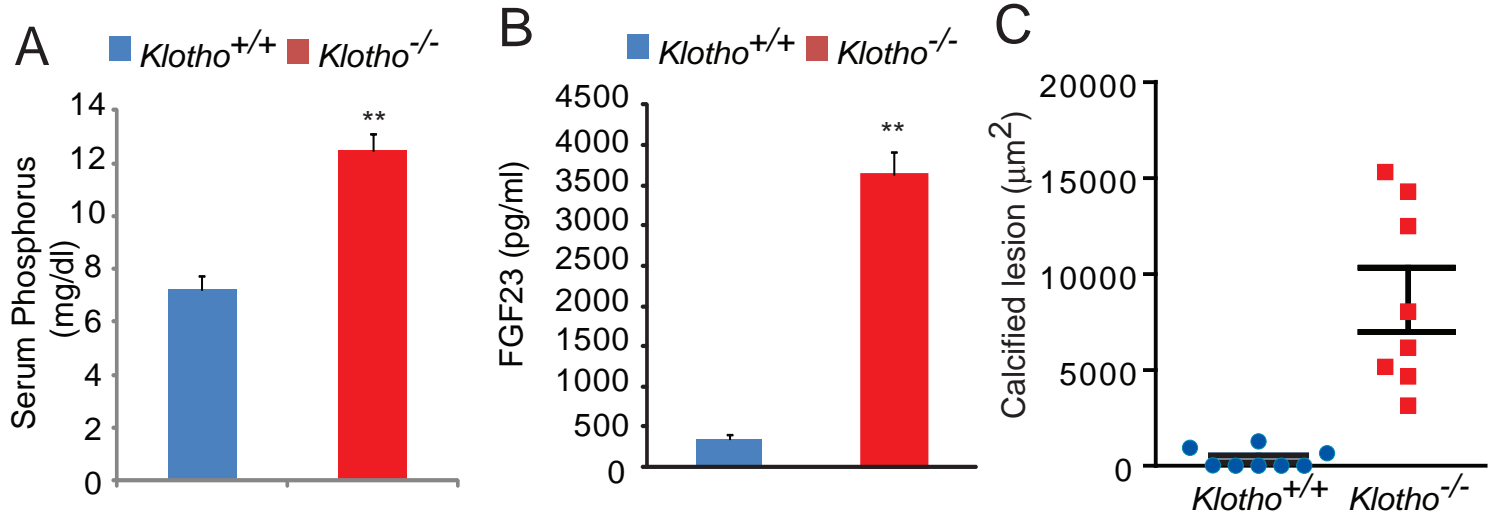

Supplemental Figure 1

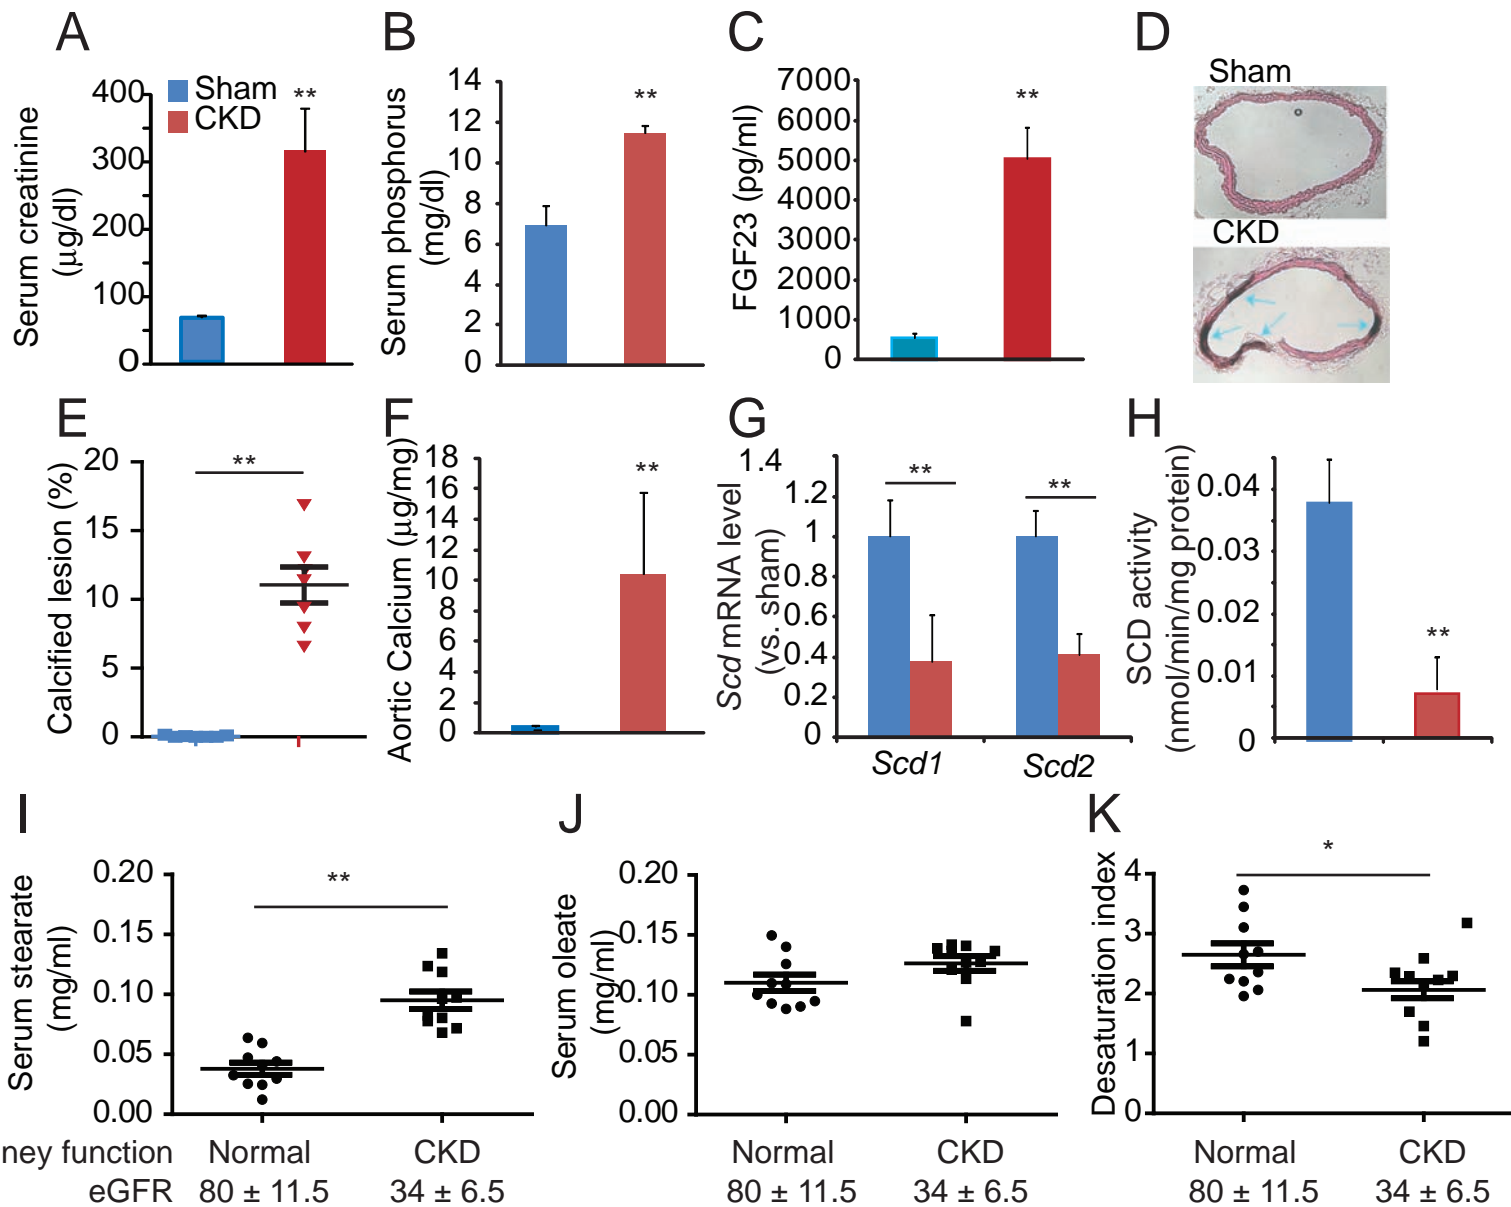

# Supplemental Figure 3

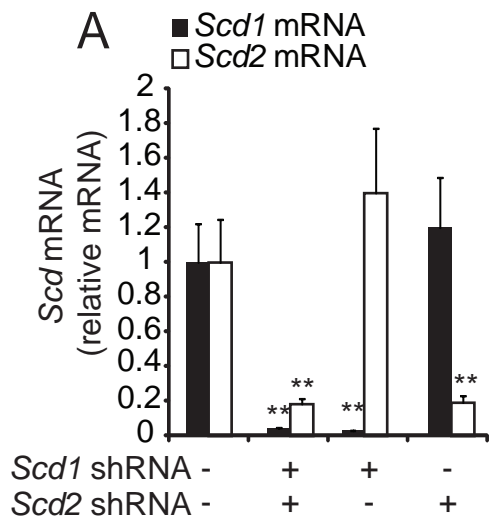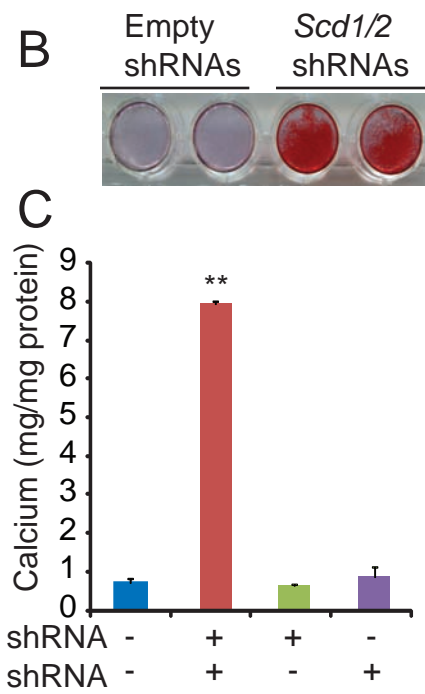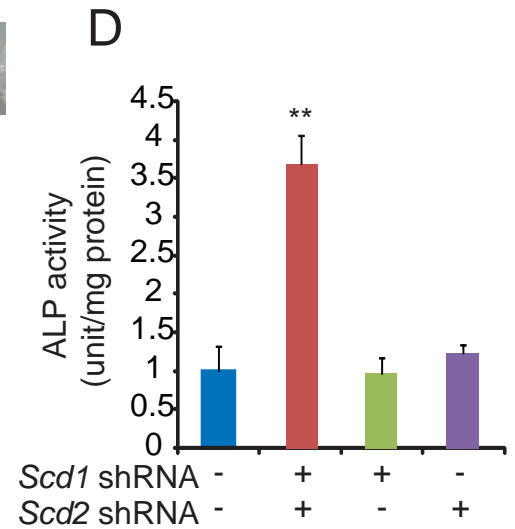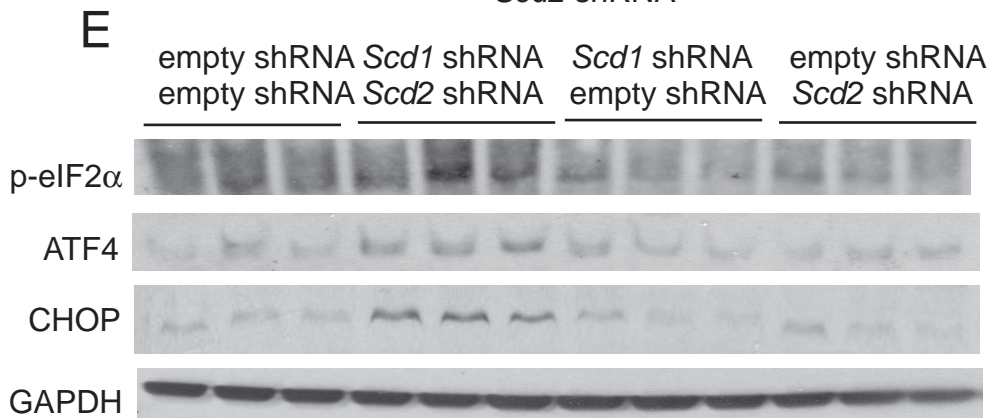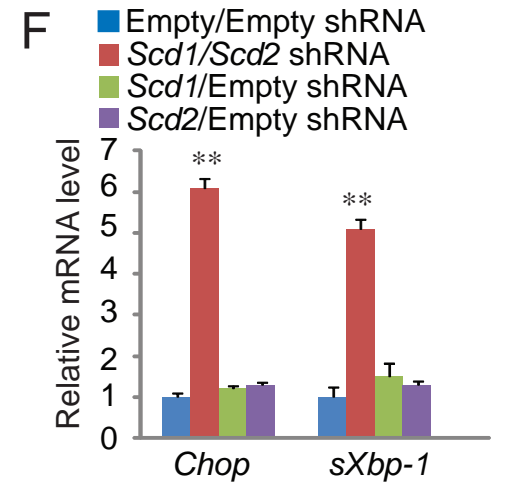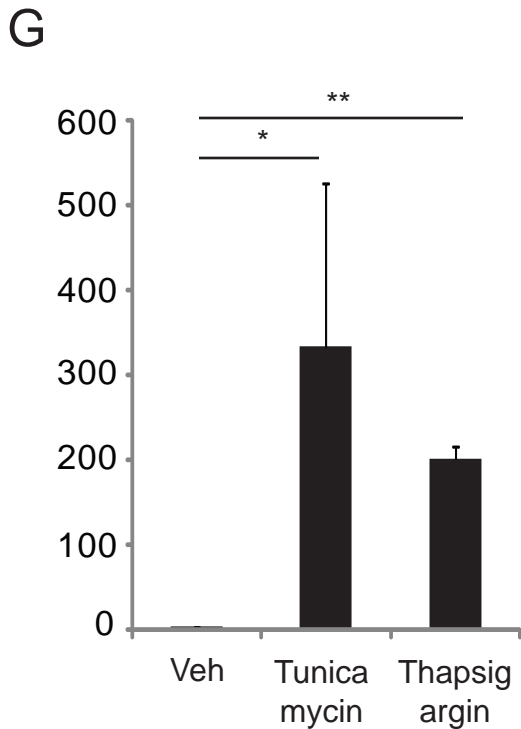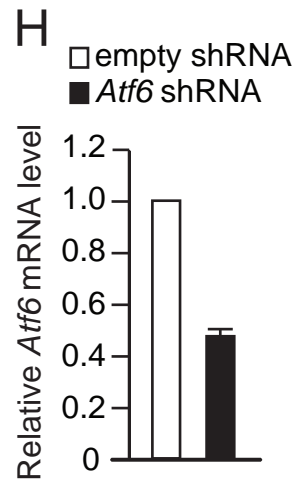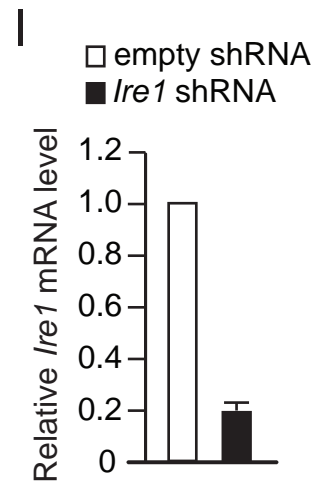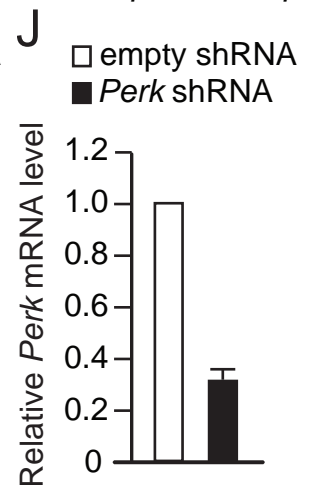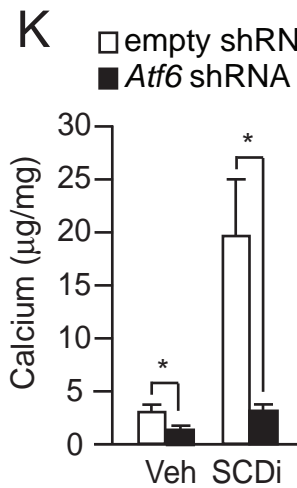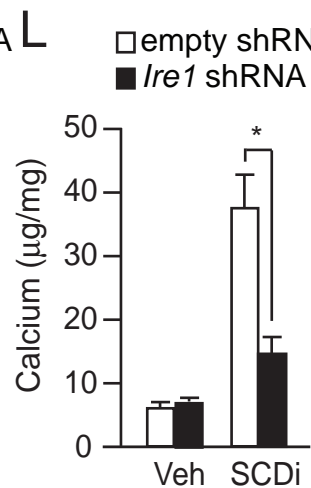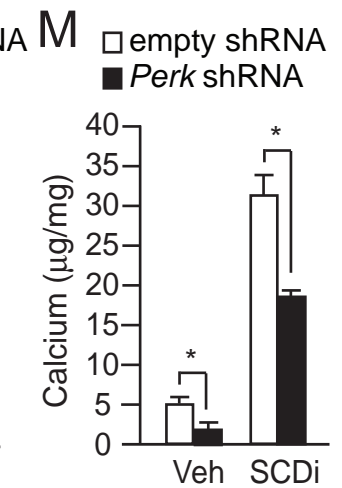

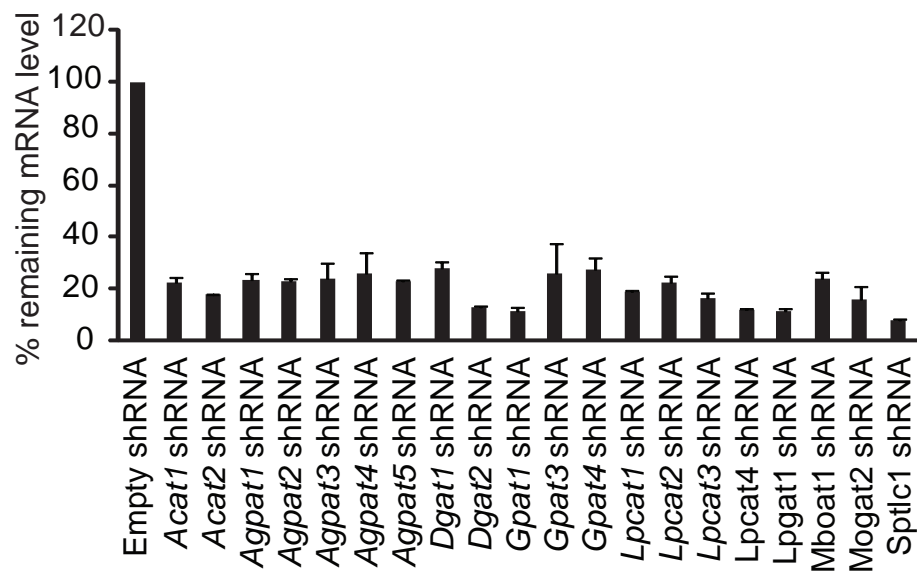

Supplemental Figure 4

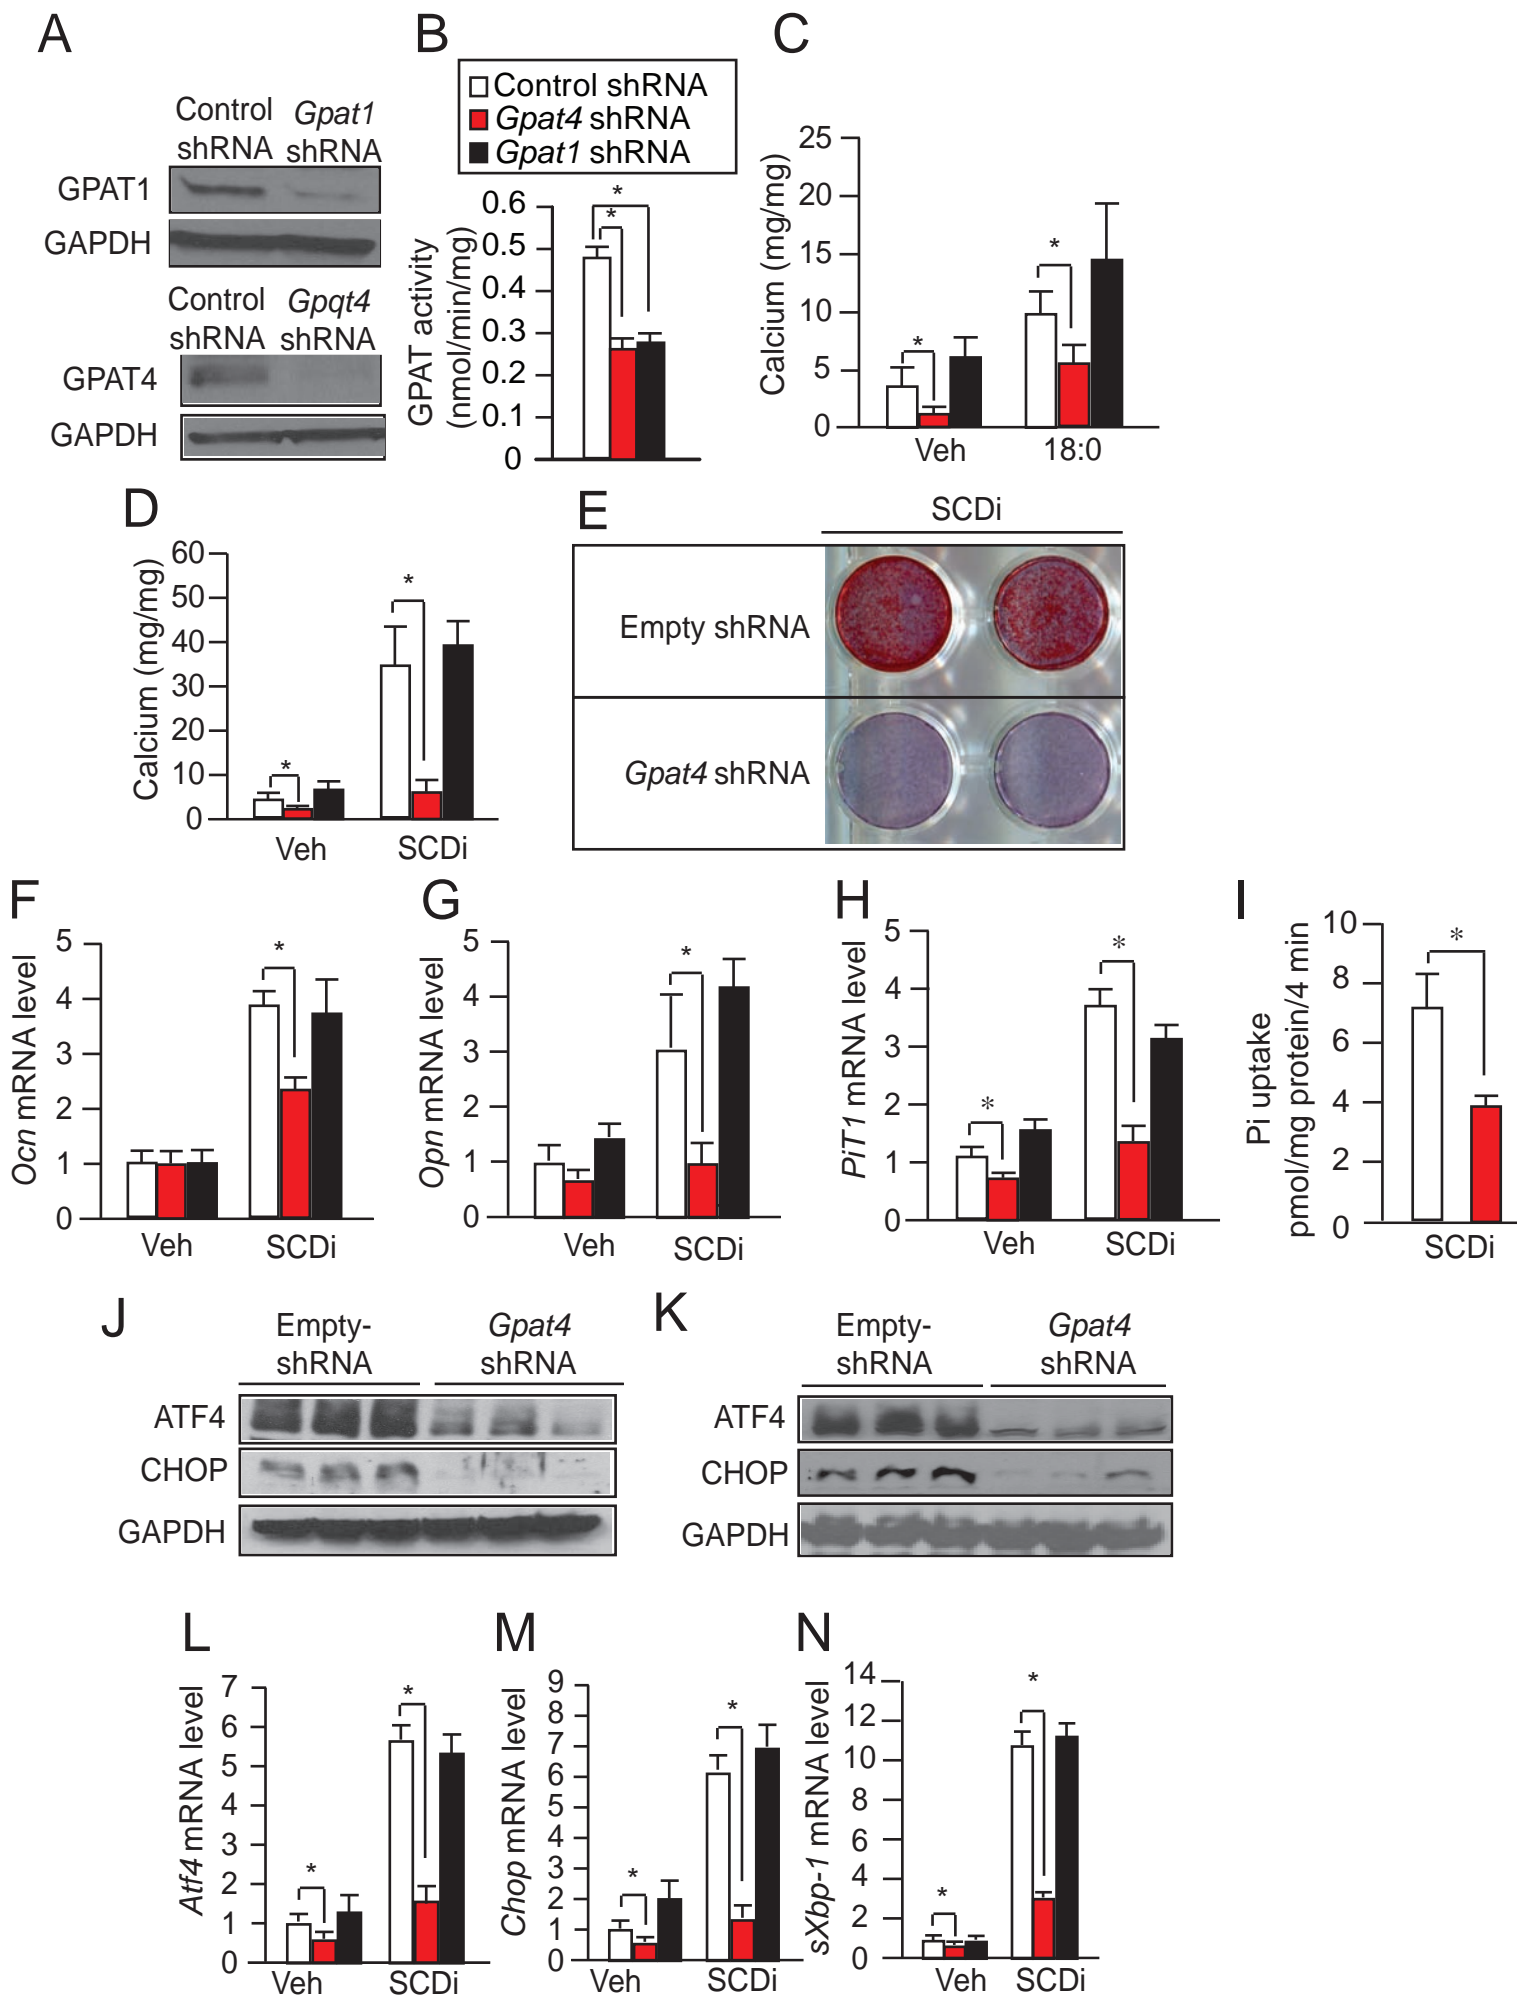

Supplemental Figure 5

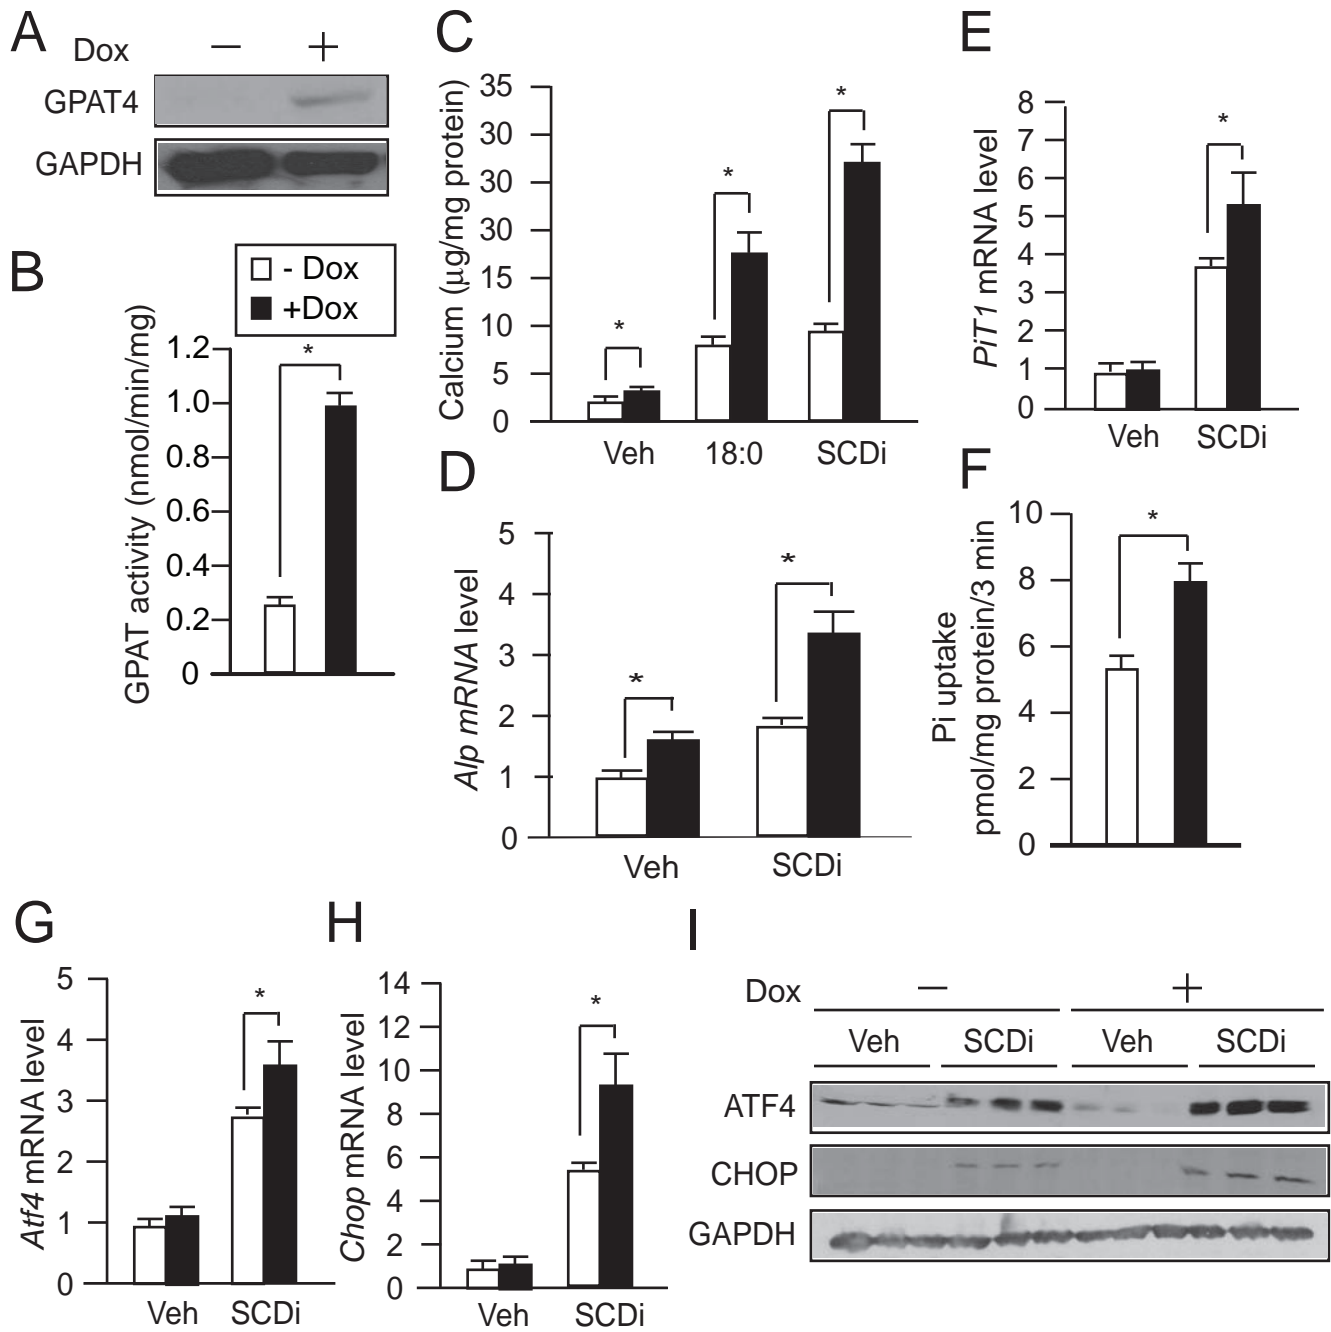

Supplemental Figure 6



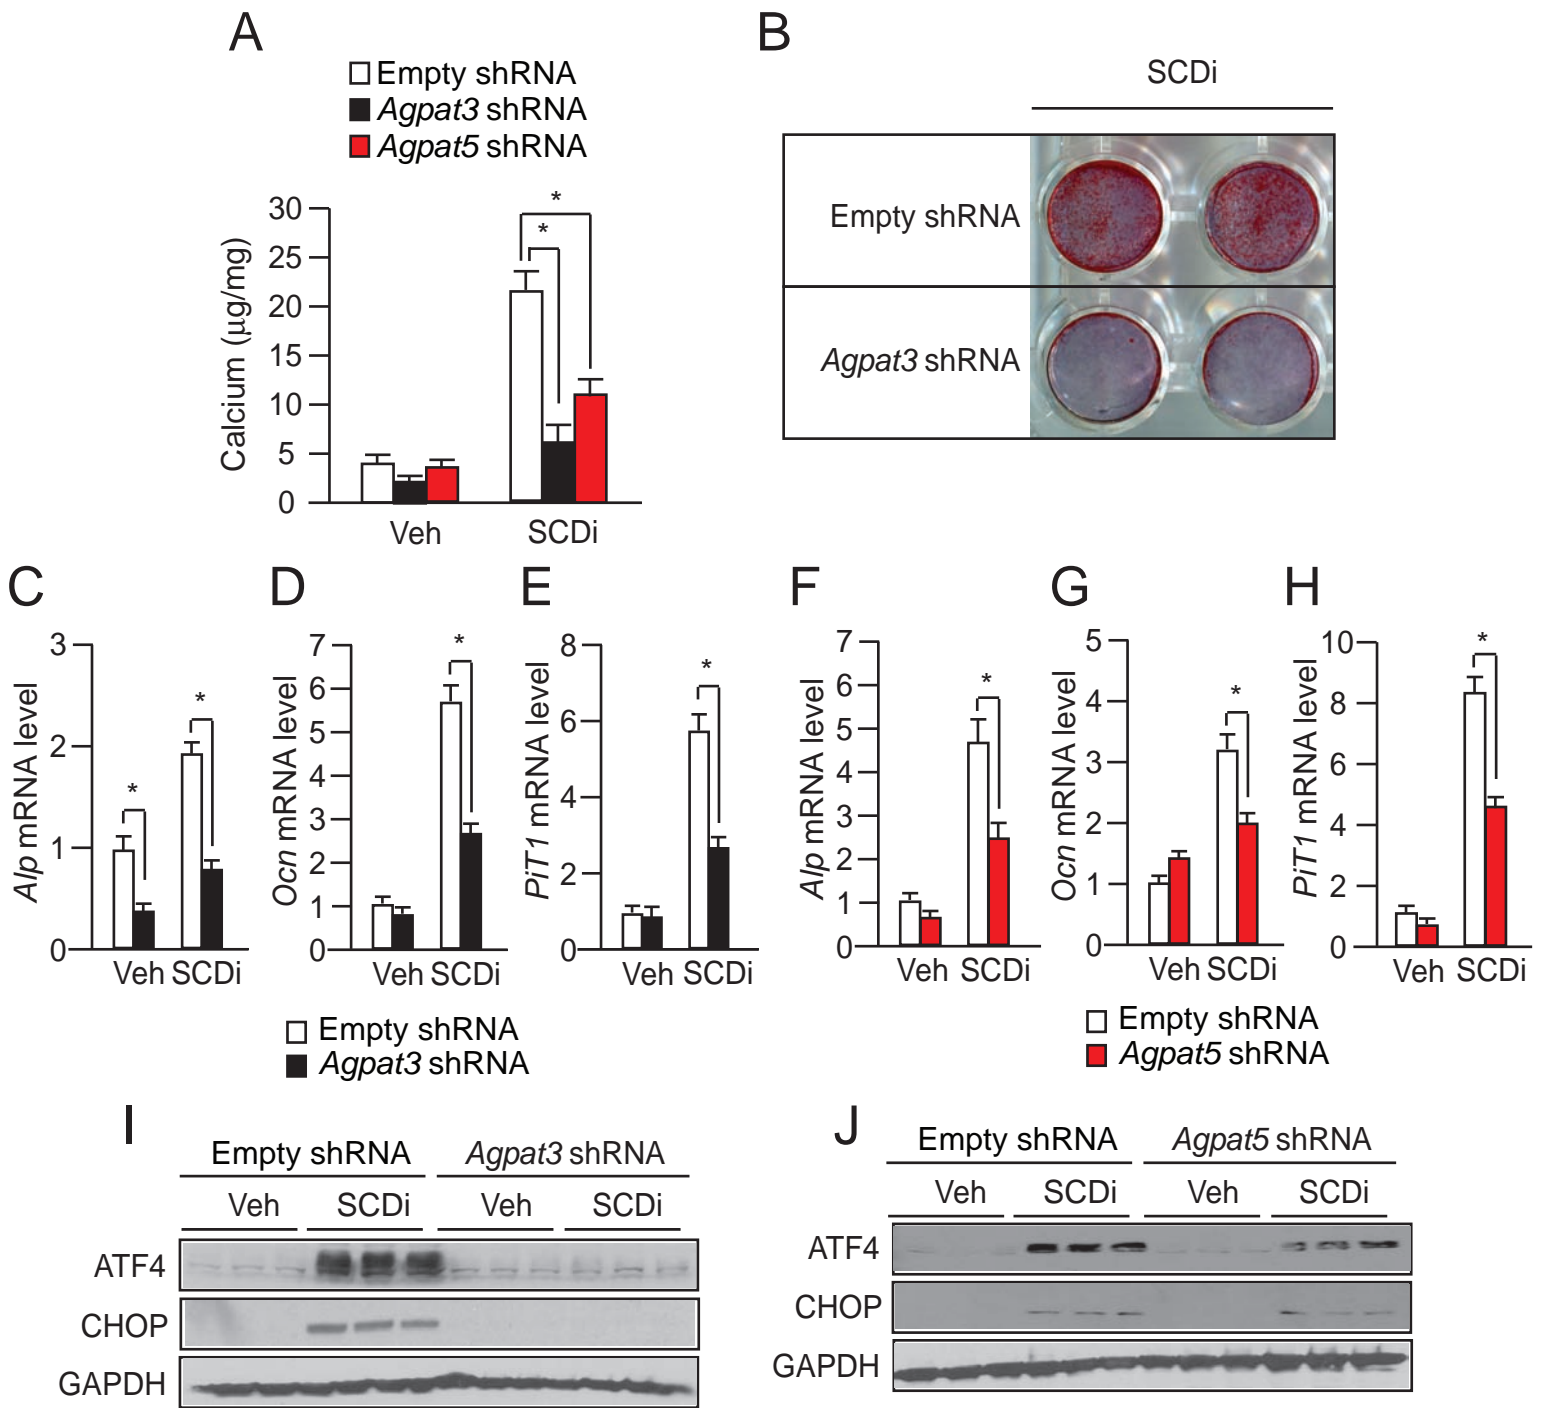

Supplemental Figure 7

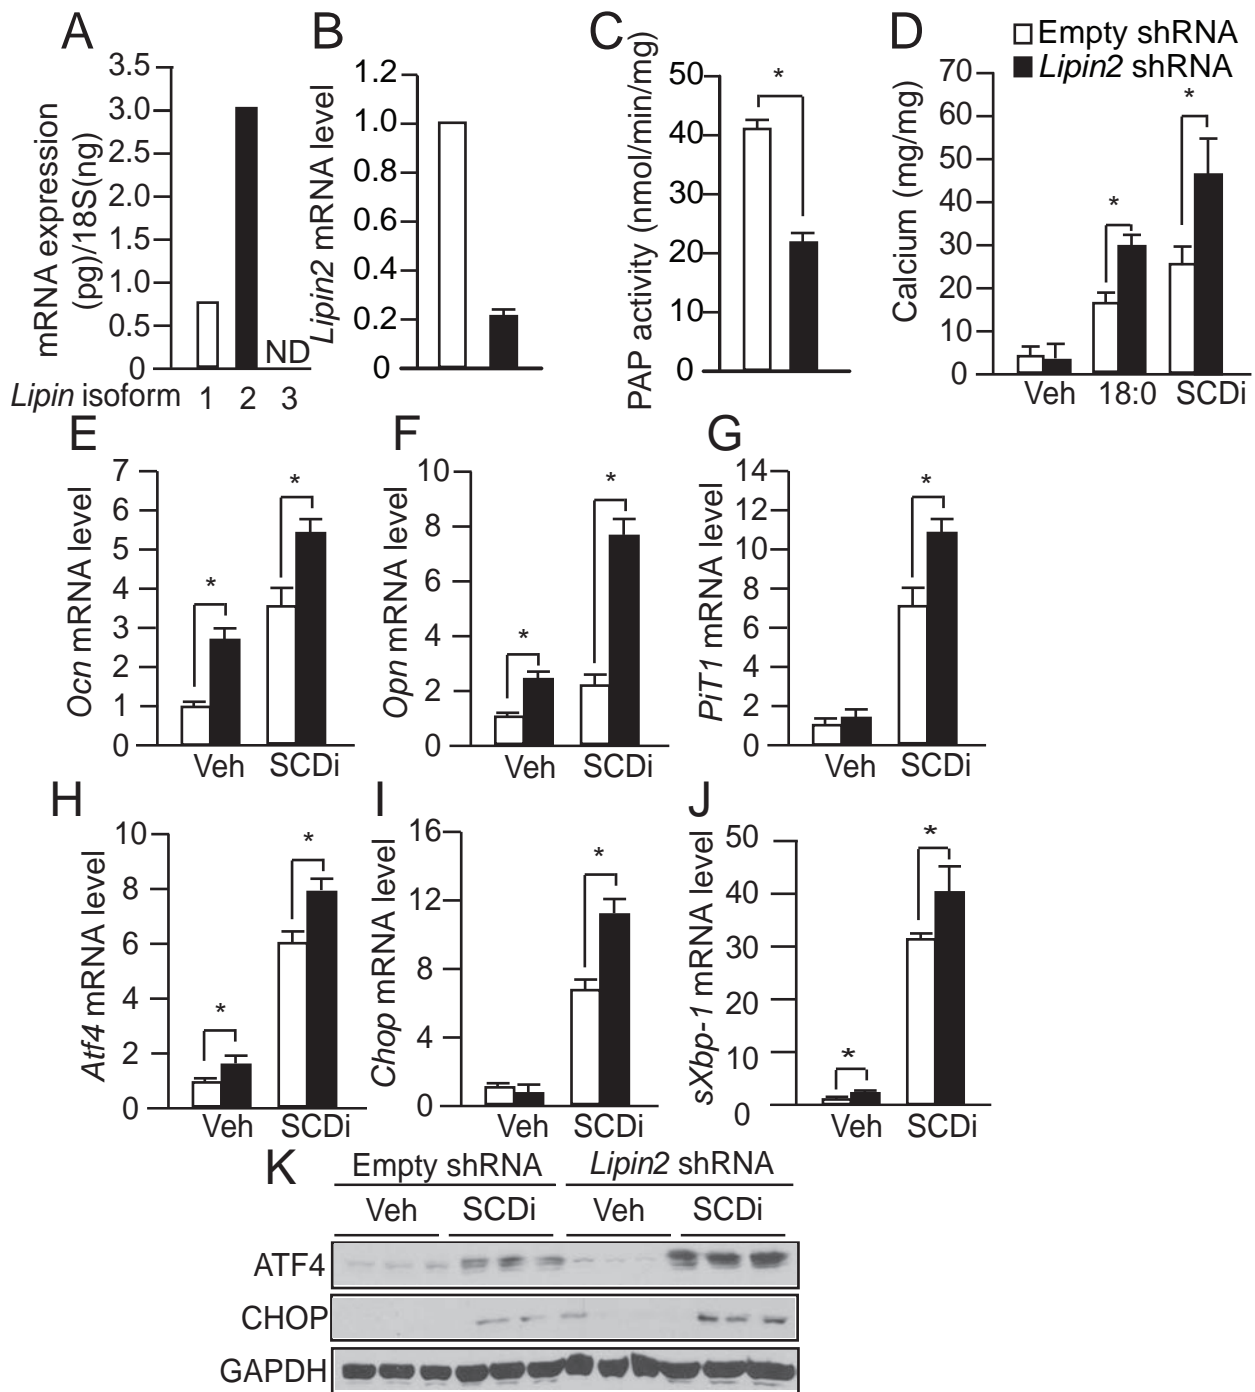

Supplemental Figure 8

A

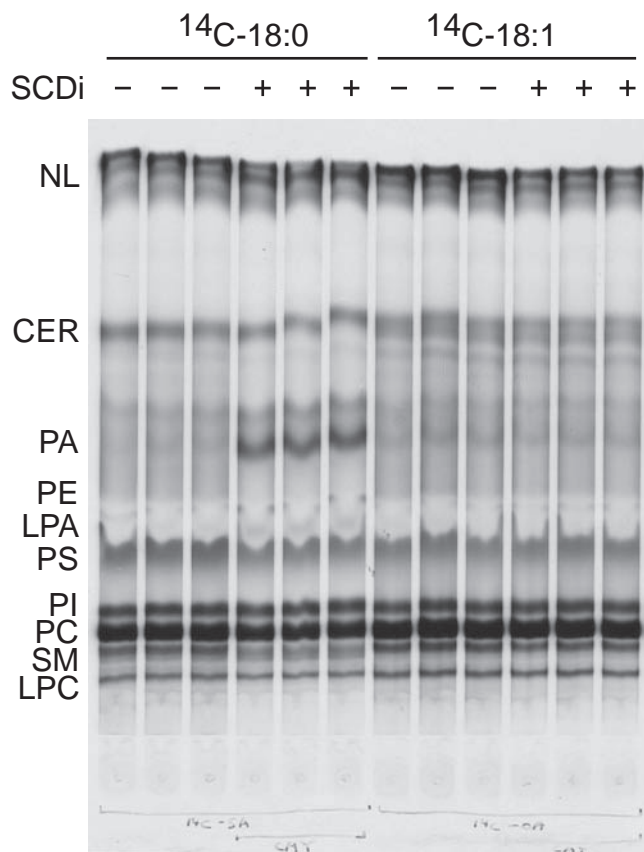

B

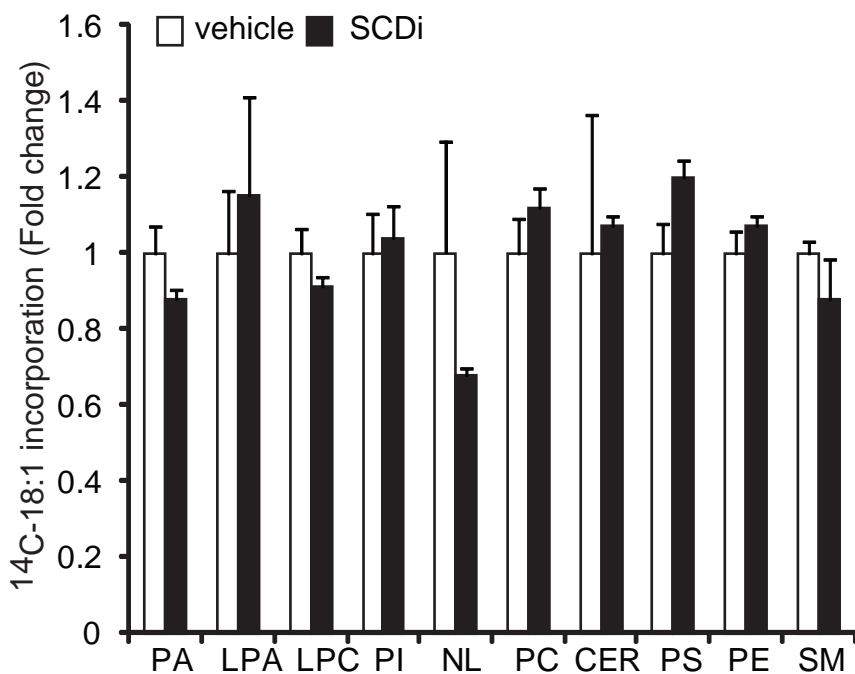

C

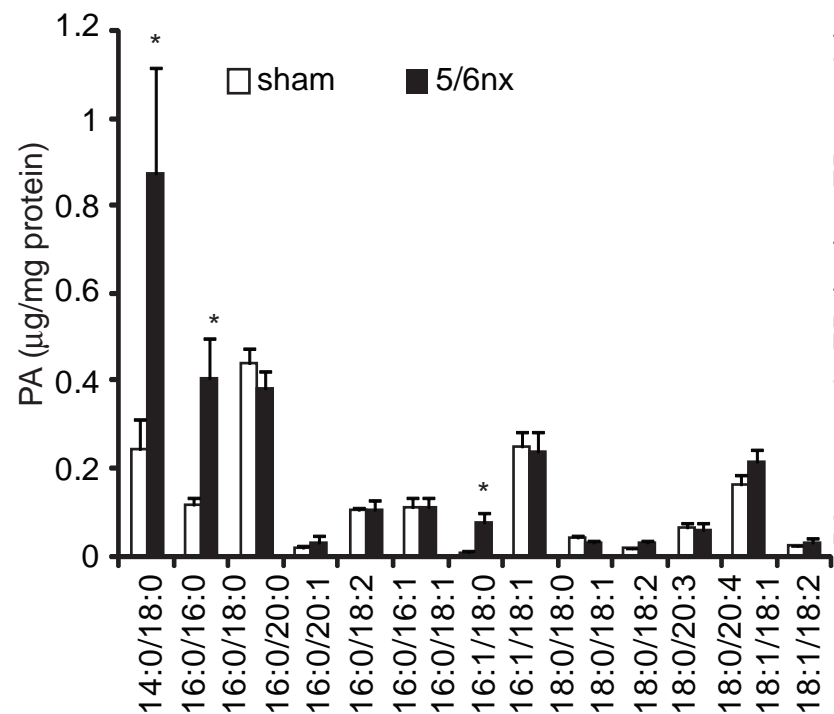

D

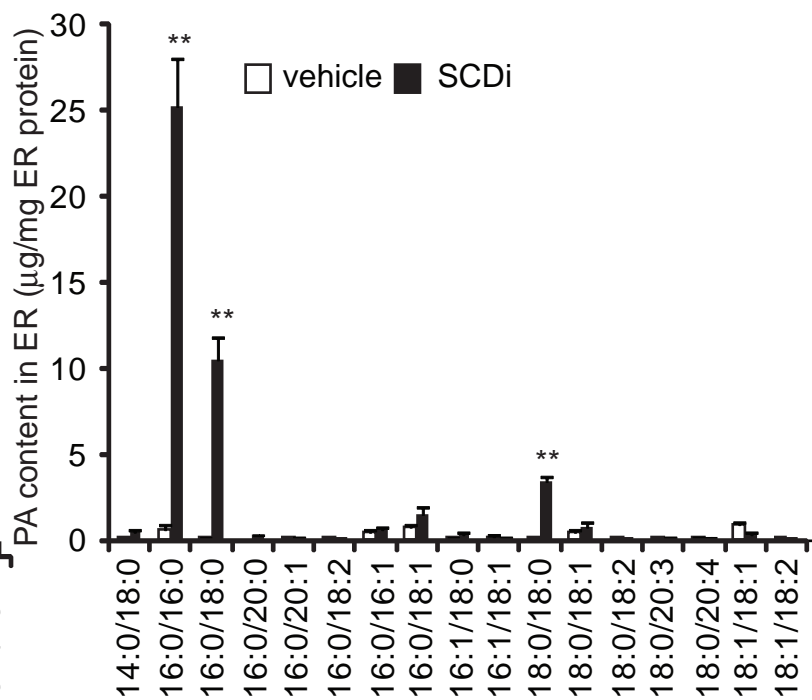

Supplemental Figure 9

**A**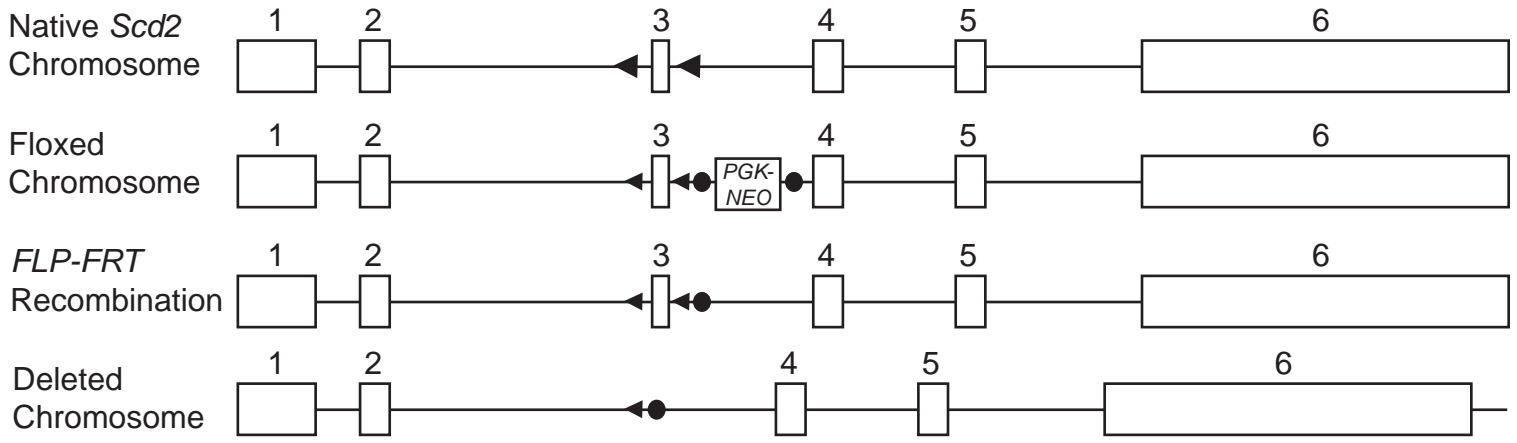**B**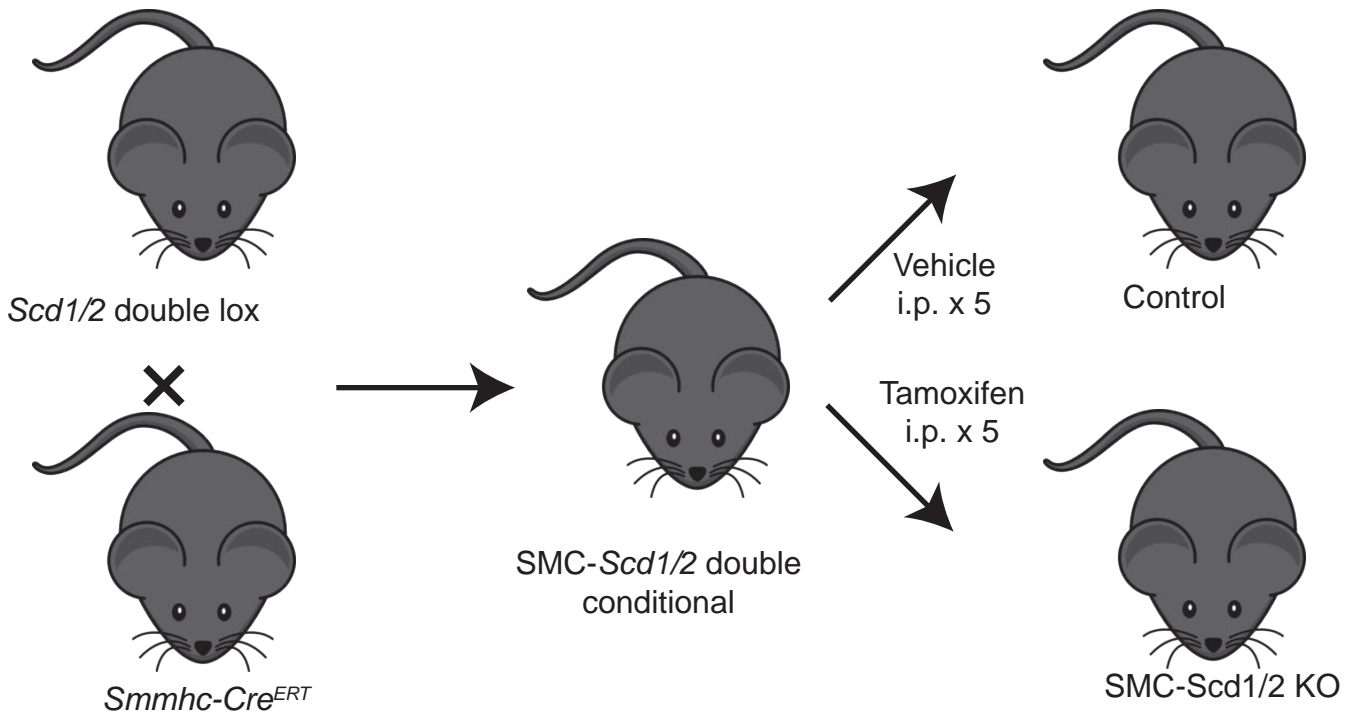

Supplemental Figure 10

**Supplemental Figure 1. Serum phosphorous, serum FGF23 and vascular calcification in *Klotho*<sup>-/-</sup> mice.** A) Phosphorous and B) FGF23 in *SMMHC-GFP; Klotho*<sup>-/-</sup> mice and *SMMHC-GFP; Klotho*<sup>+/+</sup> mice (N=8). C) Quantification of calcified lesions in the aortic sinuses of *SMMHC-GFP; Klotho*<sup>-/-</sup> mice and *SMMHC-GFP; Klotho*<sup>+/+</sup> mice. The lesions of aortic sinuses were cryosectioned and stained with von Kossa.

**Supplemental Figure 2. CKD reduces SCD activity in DBA/2J mice and human patients.** 8-week-old DBA/2J male mice fed a chow diet (N=6) were 5/6 nephrectomized or sham-operated and fed a Western diet (TD110198, Harlan Teklad) for 10 weeks. A) Serum creatinine, B) serum phosphorus and C) FGF23 levels in sham-operated (blue) and 5/6 nephrectomized (red) DBA/2J mice. D) Representative picture of aortas with von Kossa staining. E) Quantification of calcified lesions in the aortas of sham-operated and 5/6 nephrectomized DBA/2J mice. The aortas were cryosectioned and stained with von Kossa. F) Aortic calcium content in sham-operated and 5/6 nephrectomized DBA/2J mice. Aortic calcium level was analyzed using an ash assay coupled with a colorimetric assay. G) Levels of *Scd1* and *Scd2* mRNA in the aortic medial layers of sham-operated and 5/6 nephrectomized DBA/2J mice. H) Aortic SCD activity in sham-operated and 5/6 nephrectomized DBA/2J mice. I) Serum stearate, J) serum oleate and K) desaturation index (18:1/18:0) in age-matched human patients (N=10 per group) with normal kidney function and stage 3 and 4 CKD was measured by gas chromatography using heptadecanoic acid as an internal standard. Other parameters were previously reported (9). \* $p < 0.05$  and \*\* $p < 0.01$  (2-tailed Student's t-test).

**Supplemental Figure 3. *Scd1* and *Scd2* dual knockdown but not *Scd1* and *Scd2* single knockdown induces mineralization, osteogenic differentiation and ER stress of VSMCs.** MOVAS-1 cells were treated with adenovirus containing *Scd1* shRNA and lentivirus containing *Scd2* shRNA. For the dual knockdown, *Scd2* stable knockdown MOVAS-1 cells were treated with adenovirus containing *Scd1* shRNA at a multiplicity of infection (MOI) of 40. A) *Scd1* and *Scd2* mRNA levels in *Scd1* and *Scd2* dual knockdown cells. Control cells and *Scd2* stable knockdown cells were treated with adenovirus containing SCD1 shRNA or empty shRNA for 24 hours. *Scd1* and *Scd2* mRNA levels were analyzed with real-time qPCR. B) Calcium deposit. Cells treated with empty shRNAs and *Scd1/2* shRNA were stained with Alizarin red. C) Calcium content in *Scd1* and *Scd2* dual knockdown cells. Control cells and SCD2 stable knockdown cells were treated with adenovirus containing *Scd1* shRNA or empty shRNA for 7 days in the

presence of 2.0 mM inorganic phosphate. Calcium was extracted with 0.1N HCl and analyzed with a colorimetric assay. D) ALP activity in *Scd1* and *Scd2* dual knockdown cells. *Scd2* stable knockdown cells were treated with adenovirus containing *Scd1* shRNA or empty shRNA for 4 days. E) Immunoblot analysis of ER stress markers. Control cells and *Scd2* stable knockdown cells were treated with adenovirus containing *Scd1* shRNA or empty shRNA for 24 hours. F) mRNA levels of ER stress markers. Control cells and *Scd2* stable knockdown cells were treated with adenovirus containing *Scd1* shRNA or empty shRNA for 24 hours. G) ER stress inducers tunicamycin and thapsigargin induce mineralization of VSMCs. VSMCs were treated with 0.05  $\mu$ g/ml tunicamycin and 0.05  $\mu$ M thapsigargin for 7 days. Calcium was analyzed with a colorimetric assay. H-J) *Atf6*, *Ire1* and *Perk* shRNAs efficiently reduced their target genes. K-M) *Atf6*-, *Ire1*- and *Perk*-knockdown attenuated SCD inhibition-induced mineralization of VSMCs. *Atf6*, *Ire1* and *Perk* mRNA levels were analyzed with real-time qPCR. Cells were treated with vehicle (Veh) or SCD inhibitor (SCDi) for 7 days in the 2.0 mM inorganic phosphate. \* $p < 0.05$  and \*\* $p < 0.001$  vs. MOVAS cells treated with lentivirus containing empty shRNA and adenovirus containing empty shRNA or vehicle (Veh) (2 tailed Student's t-test).

**Supplemental Figure 4. Acyltransferase-knockdown stable VSMCs.** ShRNA-mediated knockdown of acyltransferases in VSMCs. MOVAS-1 cells were infected with lentiviruses containing acyltransferase shRNAs for 48 hours and selected with 5  $\mu$ g/ml puromycin to generate each acyltransferase stable knockdown VSMC. Levels of acyltransferase mRNAs were determined by real-time qPCR. Each shRNA reduced its targeted acyltransferase by over 75%. N=3.

**Supplemental Figure 5. *Gpat4* but not *Gpat1* knockdown inhibits SFA induced-mineralization, osteogenic differentiation and ER stress in VSMCs.** A) Immunoblot analysis of GPAT1 and GPAT4 in *Gpat* knockdown cells. MOVAS-1 cells were treated with *Gpat1* and *Gpat4* shRNA. A single colony was isolated from MOVAS-1 cells infected with each lentivirus in the presence of puromycin. B) GPAT activity in *Gpat* knockdown cells. Total GPAT activity was measured in total cell lysates of *Gpat1* and *Gpat4* knockdown MOVAS-1 cells. C) Stearate-induced mineralization in *Gpat1* and *Gpat4* knockdown cells. *Gpat1* and *Gpat4* knockdown cells were treated with 200  $\mu$ M stearate (18:0) for 7 days. D and E) SCDi-induced mineralization in *Gpat1* and *Gpat4* knockdown cells. *Gpat1* and *Gpat4* knockdown cells were treated with either vehicle or 300 nM SCDi for 7 days. Cells were stained with Alizarin red. F) *Ocn*, G) *Opn* and H)

*Pit1* mRNA levels in *Gpat1* and *Gpat4* knockdown cells treated with SCDi. *Gpat1* and *Gpat4* knockdown cells were treated with 300 nM SCDi for 24 hours. I) Phosphate uptake of *Gpat4* knockdown cells treated with SCDi for 16 hours. J) Immunoblot analysis of stearate-induced ER stress markers in *Gpat4* knockdown cells. *Gpat4* knockdown cells were treated with SCDi for 24 hours. K) Immunoblot analysis of SCDi-induced ER stress markers in *Gpat4* knockdown cells. *Gpat4* knockdown cells were treated with 300 nM SCDi for 24 hours. L-N) mRNA levels of ER stress markers such as *Atf4*, *Chop* and *sXbp-1* in *Gpat1* and *Gpat4* knockdown cells treated with SCDi. *Gpat1* and *Gpat4* knockdown cells were treated with 300 nM SCDi for 24 hours. White column; empty shRNA, Red column; *Gpat4* shRNA, Black column; *Gpat1* shRNA \* $p < 0.01$  (one-way ANOVA).

**Supplemental Figure 6. Human *GPAT4* overexpression augments SFA induced-mineralization, osteogenic differentiation and ER stress in VSMCs.** A) Immunoblot analysis of GPAT4. MOVAS-1 cells overexpressing human *GPAT4* were generated using a Tet-ON system. MOVAS-1 cells were treated with lentivirus containing tetR and human *GPAT4*. A single colony was isolated from MOVAS-1 cells infected with lentivirus in the presence of hygromycin and zeocin. MOVAS-1 cells containing *GPAT4* were treated with either vehicle or 1 mg/ml doxycycline (Dox) for 24 hours. B) GPAT activity. MOVAS-1 cells containing human *Gpat4* were treated with either vehicle or 1 mg/ml Dox for 24 hours. Total GPAT activity was measured in the total cell lysates of *GPAT4* overexpressed MOVAS-1 cells. C) Stearate and SCDi-induced mineralization in *GPAT4* overexpressed cells. MOVAS-1 cells containing *GPAT4* were treated with either vehicle or 1 mg/ml Dox for 24 hours and then treated with 200  $\mu$ M 18:0 and 300nM SCDi for 7 days. D) *Alp* and E) *Pit1* mRNA levels in *Gpat4* overexpressed cells. F) Phosphate uptake in *GPAT4* overexpressed cells. MOVAS-1 cells containing *Gpat4* were treated with 1 mg/ml Dox for 24 hours and then treated with 300nM SCDi for 24 hours. G) *Atf4* and H) *Chop* mRNA levels in *GPAT4* overexpressed cells. I) Immunoblot analysis of ER stress markers. MOVAS-1 cells containing *GPAT4* were treated with 1 mg/ml Dox for 24 hours and then treated with 300nM SCDi for 24 hours. White column; without Dox treatment, Black column; with Dox treatment, \* $p < 0.01$  (one-way ANOVA).

**Supplemental Figure 7. *Agpat3* and *Agpat5* knockdowns inhibit SFA-induced mineralization, osteogenic differentiation and ER stress in VSMCs.** A) SCD inhibition induced-mineralization in *Agpat3* and *Agpat5* knockdown cells. *Agpat3* and *Agpat5* knockdown

cells were treated with 300nM SCDi for 7 days in the presence of 2.0 mM phosphate. The white bar, black bar and red bar indicate MOVAS-1 cells treated with empty shRNA, *Agpat3* shRNA and *Agpat5* shRNA, respectively. B) Alizarin red staining in *Agpat3* knockdown cells treated with SCDi. *Agpat3* knockdown VSMCs cells were treated with 300 nM SCDi for 7 days in the presence of 2.0 mM phosphate and stained with Alizarin red. C) *Alp*, D) *Ocn* and E) *PiT1* mRNA levels in *Agpat3* knockdown cells treated with SCDi. F) *Alp*, G) *Ocn* and H) *PiT1* mRNA levels in *Agpat5* knockdown cells treated with SCDi. *Agpat3* and *Agpat5* knockdown cells were treated with 300 nM SCDi for 24 hours. I) Immunoblot analysis of SCDi-induced ER stress markers in *Agpat3* knockdown cells. J) Immunoblot analysis of SCDi- induced ER stress markers in *Agpat5* knockdown cells. *Agpat3* and *Agpat5* knockdown cells were treated with SCDi for 24 hours. White column; Empty shrNA, Black column; *Agpat3* shRNA, Red column; *Agpat5* shRNA. \* $p < 0.01$  (one-way ANOVA or 2 tailed Student's t-test).

**Supplemental Figure 8. *Lipin2* knockdown augments SFA-induced mineralization, osteogenic differentiation and ER stress in VSMCs.** A) *Lipin* isoform expression. Levels of *Lipin* isoform mRNA were analyzed by real-time qPCR with an absolute standard curve method using plasmids containing a full length of each *Lipin* cDNA. ND; not detected. B) mRNA levels of *Lipin2* in *Lipin2* knockdown MOVAS-1 cells. MOVAS-1 cells were treated with *Lipin2* shRNA. A single colony was isolated from MOVAS-1 cells infected with each lentivirus in the presence of puromycin. C) PAP activity in *Lipin2* knockdown cells. Total PAP activity was measured in the total cell lysates of *Lipin2* knockdown MOVAS-1 cells. D) Stearate and SCDi induced-mineralization in *Lipin2* knockdown cells. Cells were treated with 200  $\mu$ M 18:0 and 300nM SCDi for 7 days. The white bar and black bar indicate MOVAS-1 cells treated empty shRNA and *Lipin2* shRNA, respectively. E) *Ocn*, F) *Opn* and G) *PiT1* mRNA levels in *Lipin2* knockdown cells. H-J) mRNA Levels of ER stress markers such as *Atf4*, *Chop* and *sXbp-1* in *Lipin2* knockdown cells were treated with SCDi. *Lipin2* knockdown cells were treated with 300 nM SCDi for 24 hours. K) Immunoblot analysis of ER stress markers. Cells were treated with either vehicle or 300nM SCDi for 24 hours. White column; Empty shRNA, Black column; *Lipin2* shRNA. \* $p < 0.01$  (2 tailed Student's t-test).

**Supplemental Figure 9. Stearic but not oleic acid preferentially accumulates as PA in the ER.** A) Autoradiography quantification of  $^{14}$ C-stearic acid (18:0) and oleic acid (18:1) incorporation into the lipid fraction in human VSMCs treated with SCDi. Human VSMCs were



pre-treated with SCDi for 2 hours and then incubated with  $^{14}\text{C}$ -18:0 and  $^{14}\text{C}$ -18:1 for 6 hours in the presence/absence of SCDi. Total lipids isolated from total cell lysate (3 mg protein) were separated on a boric acid-coated TLC. B) Quantification of  $^{14}\text{C}$ -oleic acid (18:1) incorporation into the lipid fraction in VSMCs treated with SCDi. C) Levels of PA species in the medial layer of aortas from DBA/2J with sham operations and DBA/2J mice with 5/6 nephrectomies (nx). 8-week-old DBA/2J male mice fed a chow diet (N=6) were 5/6 nephrectomized or sham-operated and fed a Western diet (TD110198, Harlan Teklad) for 10 weeks. Eighteen-week-old male mice were sacrificed after a 4 hour fasting. D) Absolute levels of PA species in the ER fraction of VSMCs treated with SCDi. Human VSMCs were treated with SCDi for 12 hours. ER fraction was isolated using a sucrose gradient ultracentrifugation. PA levels were analyzed by LC-MS/MS.  $**p < 0.001$  (2 tailed Student's t-test).

**Supplemental Figure 10. Generation of SMC-*Scd1/2* conditional knockout (cKO) mice.** A) Scheme of targeting construct design of the *Scd2* locus. Triangles and circles indicate the *loxP* site and the *FRT* site, respectively. *Scd2* cKO mice were backcrossed 10 times with C57Bl6 and bred with *Rosa26-FLP* transgenic mice for removing the *PGK-NEO* cassette. B) Strategy for the generation of SMC-*Scd1/2* knockout (KO) mice and control mice. Mice were sacrificed after 12 weeks of tamoxifen injections.
